# Supplementary material for: A new tool for converting food frequency questionnaire data into nutrient and food group values: FETA research methods and availability
Source: PubMed Central journal article supplement (PMC3975761; doi:10.1136/bmjopen-2013-004503), 2014-03-27
Supplement: bmjopen-2013-004503.draft_revisions.pdf [file bmjopen-2013-004503.draft_revisions.pdf]

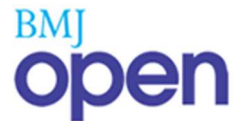

**A new tool for converting food frequency questionnaire data into nutrient and food group values: FETA research methods and availability**

|                                 |                                                                                                                                                                                                                                                                                                                                                                                                                                                                                                                                                                                                    |
|---------------------------------|----------------------------------------------------------------------------------------------------------------------------------------------------------------------------------------------------------------------------------------------------------------------------------------------------------------------------------------------------------------------------------------------------------------------------------------------------------------------------------------------------------------------------------------------------------------------------------------------------|
| Journal:                        | <i>BMJ Open</i>                                                                                                                                                                                                                                                                                                                                                                                                                                                                                                                                                                                    |
| Manuscript ID:                  | bmjopen-2013-004503                                                                                                                                                                                                                                                                                                                                                                                                                                                                                                                                                                                |
| Article Type:                   | Research                                                                                                                                                                                                                                                                                                                                                                                                                                                                                                                                                                                           |
| Date Submitted by the Author:   | 19-Nov-2013                                                                                                                                                                                                                                                                                                                                                                                                                                                                                                                                                                                        |
| Complete List of Authors:       | Mulligan, Angela; University of Cambridge, Public Health & Primary Care<br>Luben, Robert; University of Cambridge, Public Health & Primary Care<br>Bhaniani, Amit; University of Cambridge, Public Health & Primary Care<br>Parry-Smith, David; University of Cambridge, Public Health & Primary Care<br>O'Connor, Laura; University of Cambridge, Institute of Metabolic Science<br>Khawaja, Anthony; University of Cambridge, Public Health & Primary Care<br>Forouhi, Nita; University of Cambridge, Institute of Metabolic Science<br>Khaw, KayTee; University of Cambridge, Clinical Medicine |
| <b>Primary Subject Heading</b>: | Research methods                                                                                                                                                                                                                                                                                                                                                                                                                                                                                                                                                                                   |
| Secondary Subject Heading:      | Health informatics, Public health, Nutrition and metabolism, Epidemiology                                                                                                                                                                                                                                                                                                                                                                                                                                                                                                                          |
| Keywords:                       | PUBLIC HEALTH, EPIDEMIOLOGY, Nutrient intakes, food frequency questionnaire                                                                                                                                                                                                                                                                                                                                                                                                                                                                                                                        |
|                                 |                                                                                                                                                                                                                                                                                                                                                                                                                                                                                                                                                                                                    |

SCHOLARONE™  
Manuscripts

Only

1 A new tool for converting food frequency questionnaire data into nutrient and food group values:  
2 FETA research methods and availability

3  
4  
5  
6  
7 Angela A Mulligan<sup>a1 c1</sup>, Robert N Luben<sup>a1</sup>, Amit Bhaniani<sup>a1</sup>, David J Parry-Smith<sup>a1</sup>, Laura  
8 O'Connor<sup>a2</sup>, Anthony P Khawaja<sup>a1</sup>, Nita G Forouhi<sup>\*a2</sup>, Kay-Tee Khaw<sup>\*a1, a3</sup>

9  
10  
11 \* indicates equal contribution as authors

12  
13 <sup>a1</sup> European Prospective Investigation into Cancer and Nutrition, Department of Public Health and  
14 Primary Care, University of Cambridge, Strangeways Research Laboratory, Worts Causeway,  
15 Cambridge, UK

16  
17 <sup>a2</sup> MRC Epidemiology Unit, Institute of Metabolic Science, Addenbrooke's Hospital, University of  
18 Cambridge, Cambridge, UK

19  
20 <sup>a3</sup> EPIC, Department of Gerontology, Addenbrooke's Hospital, School of Clinical Medicine,  
21 University of Cambridge, Cambridge, UK

22  
23  
24  
25  
26 Source of support: MRC Population Health Sciences Research Network (PHSRN), Cancer Research  
27 UK (C864/A8257) and the Medical Research Council (G0401527, G1000143)

28  
29  
30  
31  
32 Running title: FETA: new processing tool for FFQs

33  
34  
35 **Key words:** food frequency questionnaire, nutritional output, processing tool, EPIC-Norfolk

36  
37  
38  
39  
40 **Correspondence:**

41 <sup>c1</sup> Corresponding author: Ms A. Mulligan, telephone +44 1223 748683, fax +44 1223 748676, email  
42 [angela.mulligan@phpc.cam.ac.uk](mailto:angela.mulligan@phpc.cam.ac.uk)

43  
44  
45  
46 **Abbreviations:** FFQ, food frequency questionnaire; EPIC, European Prospective Investigation into  
47 Cancer and Nutrition; FETA, FFQ EPIC Tool for Analysis; CAFÉ, Compositional Analyses from  
48 Frequency Estimates

49  
50  
51  
52  
53 Word count: 3 254

1  
2  
3  
4  
5  
6  
7  
8  
9  
10  
11  
12  
13  
14  
15  
16  
17  
18  
19  
20  
21  
22  
23  
24  
25  
26  
27  
28  
29  
30  
31  
32  
33  
34  
35  
36  
37  
38  
39  
40  
41  
42  
43  
44  
45  
46  
47  
48  
49  
50  
51  
52  
53  
54  
55  
56  
57  
58  
59  
60

## 33 ABSTRACT

### 34 Objectives

35 To describe the research methods for the development of a new tool which processes data from the  
36 European Prospective Investigation into Cancer and Nutrition Norfolk Food Frequency  
37 Questionnaire (EPIC-Norfolk FFQ). A further aim was to compare nutrient and food group values  
38 derived from the current tool (FETA; FFQ EPIC Tool for Analysis) with the previously validated  
39 but less accessible tool, CAFÉ (Compositional Analyses from Frequency Estimates). The effect of  
40 text matching on intake data was also investigated

### 41 Design

42 Cross-sectional analysis of a prospective cohort study – EPIC-Norfolk.

### 43 Setting

44 East England population (city of Norwich and its surrounding small towns and rural areas).

### 45 Participants

46 Complete FFQ data from 11 250 men and 13 602 women with a mean age of 59 years (range 40 –  
47 79 years).

### 48 Outcome measures

49 Nutrient and food group intakes derived from FETA and CAFÉ analyses of EPIC-Norfolk FFQ  
50 data.

### 51 Results

52 Nutrient outputs from FETA and CAFÉ were similar; mean (SD) energy intake from FETA was  
53 9222 kJ (2633) in men, 8113 kJ (2296) in women, compared to CAFÉ intakes of 9175 kJ (2630) in  
54 men, 8091 kJ (2298) in women. The majority of differences resulted in one or less quintile change  
55 (98.7%). Only mean daily fruit and vegetable food group intakes were higher in women than in men  
56 (278 v 212 g and 284 v 255 g respectively). Quintile changes were evident for all nutrients, with the  
57 exception of alcohol, when text matching was not executed; however, only the cereals food group  
58 was affected.

## 59 **Conclusions**

60 FETA produces similar nutrient and food group values to the previously validated CAFÉ but has  
61 the advantages of being open source, cross-platform and complete with a data-entry form directly  
62 compatible with the software. The tool will facilitate research using the EPIC-Norfolk FFQ, and  
63 can be customised for different study populations.

## 64 **Strengths and limitations of this study**

- 65 • FETA has been tested using a large study sample of food intake data.
- 66 • No independent reference method used in the comparisons of Feta and CAFÉ nutrient intake  
67 data although the CAFÉ system has been previously validated.

## 69 **INTRODUCTION**

70 Food Frequency Questionnaires (FFQs) are commonly used in epidemiological studies to assess the  
71 dietary intake of large populations. Their popularity derives from ease of administration, ability to  
72 assess dietary intake over a defined period of time, and low costs (1). The European Prospective  
73 Investigation into Cancer and Nutrition (EPIC)-Norfolk FFQ is semi-quantitative and designed to  
74 record the average intake of foods during the previous year. The principles involved in data  
75 collection and processing of the EPIC-Norfolk FFQ and the development of the structure and  
76 content of the CAFÉ program for calculating nutrient intakes have been published previously (2).  
77 The EPIC-Norfolk FFQ has been extensively validated and has been widely used (3);(4);(5).  
78 However, the programs used to process these FFQs, including CAFÉ, have not been easily  
79 accessible to end-users.  
80 Our objectives were to develop a new, open source, cross-platform processing tool (FETA - FFQ  
81 EPIC Tool for Analysis) based on and building upon the earlier system, CAFÉ (2). The aim of this  
82 report was to describe the research methods of the development of FETA, and to compare nutrient  
83 output from the FETA and CAFÉ programs. Food group intake data from FETA has also been  
84 described as has the effect of free text matching on nutrient and food group intake data.

1  
2 853  
4 86 **METHODS**5  
6 87 **EPIC-FFQ design**

7  
8 88 The questionnaire consists of two parts. Part 1 consists of a food list of 130 lines; each line has a  
9  
10 89 portion size attached to it: medium serving, standard unit or household measure. Study participants  
11  
12 90 were requested to select an appropriate frequency of consumption for each line, from the nine  
13  
14 91 frequency categories. As an example, Figure 1 illustrates the sections relating to bread, savoury  
15  
16 92 biscuits and breakfast cereals. A pdf copy of the EPIC-Norfolk FFQ may be downloaded from  
17  
18 93 <http://www.srl.cam.ac.uk/epic/epicffq/websitedocumentation.html>; information on how to complete  
19  
20 94 and code the FFQ is also available here. The questionnaire lines are either individual foods,  
21  
22 95 combinations of individual foods or food types. The FFQ food list is based on items from an FFQ  
23  
24 96 widely used within the USA (6);(7), but modified to reflect differences in American versus UK  
25  
26 97 brand names and some further food items were added.

27  
28 98 Part 2 contains further questions, a number of which ask for more detailed information that link  
29  
30 99 back to food lines in part one, as illustrated in Figure 2. Detailed information was requested for  
31  
32 100 breakfast cereals and fats as these are nutritionally important foods in the UK diet.

33  
34  
35  
36  
37 101 **Data collection**

38  
39 102 The EPIC-Norfolk FFQ was posted to 25 639 participants in the EPIC-Norfolk cohort study (8).  
40  
41 103 The participants were aged 40-79 years and the questionnaire was completed between 1993 and  
42  
43 104 1997. The study was approved by the Norfolk Local Research Ethics Committee, adhered to the  
44  
45 105 Declaration of Helsinki and all participants gave written informed consent. The FFQ was returned  
46  
47 106 at a health examination, where it was checked and completed, if required, by trained nursing staff.  
48  
49 107 In total, 25 351 (99%) participants returned the completed questionnaire.

50  
51  
52 108 **Comparison of FETA and CAFÉ programs**

53  
54 109 FETA uses a csv (comma-separated values) input file. Part 1 is coded as numeric values and Part 2  
55  
56 110 is coded as numeric values and food codes, using the flow-charts and look-up lists provided  
57  
58  
59  
60

1  
2 111 (<http://www.srl.cam.ac.uk/epic/epicffq/>). We have also created a Microsoft Access form-based  
3  
4 112 entry tool to facilitate FFQ data entry, based on the EPIC-Norfolk FFQ. The tool exports data in a  
5  
6 113 format directly compatible with FETA. The FETA software was written in C and C++ languages,  
7  
8 114 enabling faster processing times than SAS and the C/C++ software can also be used from the  
9  
10 115 command line. The step-based graphical wizard for running FETA was written in Perl. Whereas in  
11  
12 116 the CAFÉ program, an Oracle (Oracle Corporation, Redwood Shores, CA, USA) -based entry  
13  
14 117 system was created to enter Part 1 frequency data as numeric codes and Part 2 data as numeric  
15  
16 118 codes and free text. CAFÉ was written using SAS (SAS Software, Version 8 of the SAS System for  
17  
18 119 Unix, SAS Institute Inc., Cary, NC, USA) and links to tables in an Oracle relational database.

#### 21 120 **Part 1- data entry**

22  
23  
24 121 Data were manually entered into a spreadsheet as numeric codes, using '1' for 'never or less than  
25  
26 122 once a month', to '9' for '6+ times per day'. A code of '-9' was used to mark data where a  
27  
28 123 frequency was not recorded. Where two frequencies were provided for a line, these were both  
29  
30 124 coded, separated by a semi-colon, e.g. '2;3', and FETA processed the first value. In the CAFÉ  
31  
32 125 program, two entries per line were treated as missing data.

#### 33 126 **Part 2 – assigning of food codes to ticked boxes and free text**

34  
35  
36  
37 127 Part 2 contains hand-written text for milk, breakfast cereals and cooking fats (see Figure 2,  
38  
39 128 questions 3, 5, 6 and 7 respectively), which needs to be matched to the most appropriate food code  
40  
41 129 in order to obtain nutrient data; this process is known as free text matching. The data in part 2 were  
42  
43 130 coded using reference lists of food codes for varieties of milk, breakfast cereal and cooking fat.  
44  
45  
46 131 Where there is no clear match, it is suggested that a researcher consults the ingredients and nutrient  
47  
48 132 information of the commercial item and compares this information with the nutrient profile of  
49  
50 133 similar items from the reference lists. These reference lists and figures relating to food codes that  
51  
52 134 may be assigned to appropriate ticked boxes may be found at  
53  
54  
55 135 <http://www.srl.cam.ac.uk/epic/epicffq/websitedocumentation.html>

1  
2 136 Differences between FETA versus CAFÉ processing may also be found at  
3  
4 137 <http://www.srl.cam.ac.uk/epic/epicffq/websitedocumentation.html>; these differences relate to  
5  
6 138 breakfast cereals, frying and baking fats, the outcome of selecting the 'None' or 'No' box, and  
7  
8 139 default milk, cereal, and fat codes.

#### 10 **Databases**

11  
12 141 Each line in Part 1 of the FFQ is mapped to up to six food codes. Decisions regarding which food  
13  
14 142 codes to use were based on data from UK government surveys and other UK population data (7);  
15  
16 143 (7,9,10). These decisions were based on data for individuals aged 40-74 years (7). Data for portion  
17  
18 144 weights were sourced from UK population data and weighed records in 40-74 year old study  
19  
20 145 participants (7,11).

21  
22 146 The EPIC-Norfolk FFQ uses 290 foods from the UK food composition database, McCance and  
23  
24 147 Widdowson's "The Composition of Foods" (5<sup>th</sup> edition) and its associated supplements (12–21). A  
25  
26 148 number of new food items were added to the EPIC-Norfolk FFQ food list, which are used in both in  
27  
28 149 FETA and CAFÉ programs. These include low calorie/diet fizzy drinks and crunchy oat cereal, as  
29  
30 150 well as modified home-baked and fried foods (without their fat), to enable an individual's fat type,  
31  
32 151 as recorded in Part 2 of the FFQ, to be incorporated. However, the nutrient data of six of the nine  
33  
34 152 new foods used in the CAFÉ program were modified in FETA. These foods include crunchy oat  
35  
36 153 cereal, milk non-specific, low calorie/diet fizzy drinks, solid vegetable oil, Crisp 'n Dry (solid fat),  
37  
38 154 and oil and fat non-specific. Modifications to the nutrient data were made to ensure a more accurate  
39  
40 155 nutrient profile and/or to better reflect the foods consumed, in the case of non-specific items, such  
41  
42 156 as milk and oil/fat.

#### 48 **Identification of outliers**

49  
50 158 Outliers were defined, as detailed previously (2). In brief, the ratio of energy intake (EI) to basal  
51  
52 159 metabolic rate (BMR) was calculated, where BMR was calculated using sex-specific Schofield  
53  
54 160 equations, which included age and body weight (22). Individuals in the top and bottom 0.5% of EI:

1  
2 161 BMR ratio were identified and excluded, as were individuals with FFQs containing 10 or more  
3  
4 162 missing lines of data in Part 1 of the FFQ.

### 5 6 163 **Nutrient and food group outputs**

7  
8 164 FETA produces four nutrient output formats and a sample of each of these can be viewed at

9  
10 165 <http://www.srl.cam.ac.uk/epic/epicffq/websitedocumentation.html>

11  
12 166 Output 1 contains average daily nutrient and food group intakes for an individual from all FFQ

13  
14 167 foods consumed, in wide format, suitable for import into a spreadsheet or statistical package. Intake

15  
16 168 data for 46 nutrients are provided as well as data for 14 basic food groups, however only a selection

17  
18 169 of these nutrients is shown in this report. Output 2 contains the same nutrient intake data as output

19  
20 170 1, but in long format, which is mostly suitable for programmers. Output 3 contains average daily

21  
22 171 nutrient and food group intakes (and amount of food consumed) for an individual for each FFQ line;

23  
24 172 this output file will be very large and is mostly suitable for programmers. The most detailed output

25  
26 173 (output 4) contains average daily nutrient and food group intakes, in addition to the amount of food

27  
28 174 consumed for an individual, for each food code, for each FFQ line (meal\_id). An online description

29  
30 175 of each meal\_id and nutrient code, including units of measurement, can be found in the data entry

31  
32 176 template. This output will also be very large and is mostly suitable for programmers.

33  
34 177 A log file is created along with each output file, which records the processing of the data and

35  
36 178 provides useful error information (see Appendix 1 for log file of output 1). In these files, both notes

37  
38 179 (general process information) and error messages are recorded, with a date and time stamp. The log

39  
40 180 files make it possible to calculate the number of missing frequencies based on Part 1 (main grid) of

41  
42 181 the FFQ in order to exclude individuals with 10 or more missing ticks. The log files also record

43  
44 182 situations where a food code does not have any nutrient data attached to it.

### 45 46 183 **Statistical analyses**

47  
48 184 The data were analysed using STATA 10 (STATA Corp., Texas, USA). Intake data were described

49  
50 185 using mean, standard deviation (SD), median, minimum and maximum for both FETA and CAFÉ

51  
52 186 program outputs, stratified by sex. The nutrients selected for comparison are those described in the



1  
2 187 original CAFÉ paper. Where data on quintile changes are shown, cut-off points were calculated  
3  
4 188 using CAFÉ nutrient data in order to compare quintile shift between FETA and CAFÉ output data.  
5  
6 189

## 8 190 **RESULTS**

9  
10 191 There were FFQ data available from 25 351 participants with a mean age of 59 years. Data from 11  
11  
12 192 250 men and 13 602 women are presented here, as individuals in the top and bottom 0.5% of EI:  
13  
14 193 BMR ratio have been excluded, as have individuals with FFQs containing 10 or more missing lines  
15  
16  
17 194 of data in Part 1 of the FFQ.

### 18 195 **Nutrient intake data from FETA and CAFÉ programs**

19  
20 196 Table 1 shows the average daily intake data for a number of selected nutrients for 11 250 men. The  
21  
22 197 data were similar for most nutrients across the two programs. The nutrients which had the highest  
23  
24 198 percentage of quintile change ( $\geq 10\%$ ) were monounsaturated fat, saturated fat, iron, vitamin D &  
25  
26 199 vitamin E. However, only 1.3% of the men changed more than one quintile, for two of these five  
27  
28 200 nutrients. The nutrients which had the lowest percentage of quintile changes were alcohol, calcium  
29  
30  
31 201 and carotene, with less than 3% change (Table 1).

32  
33 202 Table 2 shows average daily intake data for the selected nutrients for 13 602 women, from FETA  
34  
35 203 and CAFÉ programs. There were similar quintile changes observed in women to those found in men  
36  
37 204 for the selected nutrients; four of the nineteen nutrients had a quintile change of greater than 10%:  
38  
39 205 polyunsaturated fat, saturated fat, iron and Vitamin E. However, the number of women who shifted  
40  
41 206 more than one quintile was generally lower than the number observed in men. The nutrients which  
42  
43 207 had the greatest percentage of women who changed more than one quintile were vitamins D and E,  
44  
45 208 with 0.7 and 0.9% respectively.

46  
47 209 Detailed (output 4) nutrient intake data at the individual level obtained from the two programs were  
48  
49 210 compared for approximately half of the participants (n=12 500; data not shown). All differences (>  
50  
51 211 0.1%) found were investigated and explanations for these differences are considered in the  
52  
53 212 discussion.  
54  
55  
56  
57  
58  
59  
60

1  
2  
3  
4  
5  
6  
7  
8  
9  
10  
11  
12  
13  
14  
15  
16  
17  
18  
19  
20  
21  
22  
23  
24  
25  
26  
27  
28  
29  
30  
31  
32  
33  
34  
35  
36  
37  
38  
39  
40  
41  
42  
43  
44  
45  
46  
47  
48  
49

Table 1 Average daily nutrient intakes for men (N=11 250) participating in the EPIC-Norfolk study, from the FETA and CAFÉ programs, after the exclusion of outliers, with numbers and percentages of men who moved quintile

| Nutrient                | FETA program |      |      |      |       | CAFÉ program |      |      |      |       | Quintile        |            |    |     |
|-------------------------|--------------|------|------|------|-------|--------------|------|------|------|-------|-----------------|------------|----|-----|
|                         | Median       | Mean | SD   | Mini | Maxi  | Median       | Mean | SD   | Mini | Maxi  | Quintile change | change > 1 |    |     |
|                         |              |      |      | mum  | mum   |              |      |      | mum  | mum   |                 | N          | %  | N   |
| Energy (kcal)           | 2126         | 2190 | 627  | 748  | 5085  | 2115         | 2179 | 626  | 748  | 5101  | 892             | 7.9        | 0  | 0.0 |
| Energy (kJ)             | 8947         | 9222 | 2633 | 3124 | 21394 | 8900         | 9175 | 2630 | 3124 | 21440 | 891             | 7.9        | 0  | 0.0 |
| Protein (g)             | 83.4         | 85.2 | 22.0 | 23.3 | 319.8 | 83.2         | 84.9 | 22.0 | 23.3 | 318.4 | 464             | 4.1        | 0  | 0.0 |
| Alcohol (g)             | 6.7          | 12.3 | 16.1 | 0.0  | 134.2 | 6.7          | 12.3 | 16.1 | 0.0  | 134.2 | 0               | 0.0        | 0  | 0.0 |
| Carbohydrate (g)        | 261          | 271  | 87   | 48   | 737   | 259          | 269  | 87   | 48   | 729   | 726             | 6.5        | 0  | 0.0 |
| Starch (g)              | 123          | 128  | 45   | 10   | 504   | 122          | 127  | 45   | 10   | 501   | 813             | 7.2        | 1  | 0.0 |
| Englyst fibre (g)       | 17.5         | 18.2 | 6.4  | 1.3  | 89.9  | 17.3         | 18.0 | 6.4  | 1.3  | 89.9  | 743             | 6.6        | 1  | 0.0 |
| Fat (g)                 | 78.9         | 83.2 | 31.3 | 13.4 | 260.6 | 78.7         | 83.0 | 31.3 | 13.4 | 260.6 | 1049            | 9.3        | 8  | 0.1 |
| Monounsaturated fat (g) | 27.0         | 28.8 | 11.6 | 4.8  | 101.2 | 26.8         | 28.5 | 11.5 | 4.8  | 105.1 | 1264            | 11.2       | 21 | 0.2 |
| Polyunsaturated fat (g) | 13.5         | 15.0 | 6.9  | 1.6  | 66.6  | 13.7         | 15.3 | 7.1  | 1.6  | 69.5  | 1074            | 9.5        | 24 | 0.2 |
| Saturated fat (g)       | 30.1         | 32.3 | 13.6 | 3.0  | 110.6 | 29.8         | 31.9 | 13.5 | 3.0  | 106.7 | 1288            | 11.5       | 20 | 0.2 |
| Calcium (mg)            | 1021         | 1039 | 301  | 189  | 2848  | 1018         | 1037 | 300  | 189  | 2849  | 296             | 2.6        | 1  | 0.0 |
| Iron (mg)               | 12.1         | 12.4 | 3.6  | 2.6  | 38.7  | 11.9         | 12.3 | 3.5  | 2.5  | 38.5  | 1149            | 10.2       | 7  | 0.1 |
| Potassium (mg)          | 3814         | 3881 | 911  | 1305 | 11718 | 3802         | 3869 | 909  | 1284 | 11718 | 411             | 3.7        | 0  | 0.0 |

|    |                 |      |      |      |      |       |      |      |      |      |       |      |      |     |     |
|----|-----------------|------|------|------|------|-------|------|------|------|------|-------|------|------|-----|-----|
| 1  |                 |      |      |      |      |       |      |      |      |      |       |      |      |     |     |
| 2  |                 |      |      |      |      |       |      |      |      |      |       |      |      |     |     |
| 3  |                 |      |      |      |      |       |      |      |      |      |       |      |      |     |     |
| 4  | Carotene (mcg)  | 3188 | 3321 | 1573 | 147  | 25720 | 3178 | 3309 | 1571 | 147  | 25720 | 156  | 1.4  | 0   | 0.0 |
| 5  | Folate (mcg)    | 320  | 331  | 97   | 77   | 1547  | 316  | 327  | 96   | 77   | 1547  | 836  | 7.4  | 3   | 0.0 |
| 6  |                 |      |      |      |      |       |      |      |      |      |       |      |      |     |     |
| 7  | Vitamin C (mg)  | 103  | 111  | 52   | 10   | 669   | 105  | 113  | 52   | 10   | 669   | 411  | 3.7  | 14  | 0.1 |
| 8  |                 |      |      |      |      |       |      |      |      |      |       |      |      |     |     |
| 9  | Vitamin D (mcg) | 3.16 | 3.65 | 2.08 | 0.03 | 27.08 | 3.13 | 3.62 | 2.06 | 0.03 | 27.12 | 1161 | 10.3 | 145 | 1.3 |
| 10 |                 |      |      |      |      |       |      |      |      |      |       |      |      |     |     |
| 11 | Vitamin E (mg)  | 13.2 | 14.9 | 7.2  | 2.1  | 62.3  | 12.9 | 14.4 | 6.8  | 2.1  | 62.0  | 1545 | 13.7 | 146 | 1.3 |
| 12 |                 |      |      |      |      |       |      |      |      |      |       |      |      |     |     |
| 13 |                 |      |      |      |      |       |      |      |      |      |       |      |      |     |     |
| 14 |                 |      |      |      |      |       |      |      |      |      |       |      |      |     |     |
| 15 |                 |      |      |      |      |       |      |      |      |      |       |      |      |     |     |
| 16 |                 |      |      |      |      |       |      |      |      |      |       |      |      |     |     |
| 17 |                 |      |      |      |      |       |      |      |      |      |       |      |      |     |     |
| 18 |                 |      |      |      |      |       |      |      |      |      |       |      |      |     |     |
| 19 |                 |      |      |      |      |       |      |      |      |      |       |      |      |     |     |
| 20 |                 |      |      |      |      |       |      |      |      |      |       |      |      |     |     |
| 21 |                 |      |      |      |      |       |      |      |      |      |       |      |      |     |     |
| 22 |                 |      |      |      |      |       |      |      |      |      |       |      |      |     |     |
| 23 |                 |      |      |      |      |       |      |      |      |      |       |      |      |     |     |
| 24 |                 |      |      |      |      |       |      |      |      |      |       |      |      |     |     |
| 25 |                 |      |      |      |      |       |      |      |      |      |       |      |      |     |     |
| 26 |                 |      |      |      |      |       |      |      |      |      |       |      |      |     |     |
| 27 |                 |      |      |      |      |       |      |      |      |      |       |      |      |     |     |
| 28 |                 |      |      |      |      |       |      |      |      |      |       |      |      |     |     |
| 29 |                 |      |      |      |      |       |      |      |      |      |       |      |      |     |     |
| 30 |                 |      |      |      |      |       |      |      |      |      |       |      |      |     |     |
| 31 |                 |      |      |      |      |       |      |      |      |      |       |      |      |     |     |
| 32 |                 |      |      |      |      |       |      |      |      |      |       |      |      |     |     |
| 33 |                 |      |      |      |      |       |      |      |      |      |       |      |      |     |     |
| 34 |                 |      |      |      |      |       |      |      |      |      |       |      |      |     |     |
| 35 |                 |      |      |      |      |       |      |      |      |      |       |      |      |     |     |
| 36 |                 |      |      |      |      |       |      |      |      |      |       |      |      |     |     |
| 37 |                 |      |      |      |      |       |      |      |      |      |       |      |      |     |     |
| 38 |                 |      |      |      |      |       |      |      |      |      |       |      |      |     |     |
| 39 |                 |      |      |      |      |       |      |      |      |      |       |      |      |     |     |
| 40 |                 |      |      |      |      |       |      |      |      |      |       |      |      |     |     |
| 41 |                 |      |      |      |      |       |      |      |      |      |       |      |      |     |     |
| 42 |                 |      |      |      |      |       |      |      |      |      |       |      |      |     |     |
| 43 |                 |      |      |      |      |       |      |      |      |      |       |      |      |     |     |
| 44 |                 |      |      |      |      |       |      |      |      |      |       |      |      |     |     |
| 45 |                 |      |      |      |      |       |      |      |      |      |       |      |      |     |     |
| 46 |                 |      |      |      |      |       |      |      |      |      |       |      |      |     |     |
| 47 |                 |      |      |      |      |       |      |      |      |      |       |      |      |     |     |
| 48 |                 |      |      |      |      |       |      |      |      |      |       |      |      |     |     |
| 49 |                 |      |      |      |      |       |      |      |      |      |       |      |      |     |     |

1  
2  
3  
4  
5  
6  
7  
8  
9  
10  
11  
12  
13  
14  
15  
16  
17  
18  
19  
20  
21  
22  
23  
24  
25  
26  
27  
28  
29  
30  
31  
32  
33  
34  
35  
36  
37  
38  
39  
40  
41  
42  
43  
44  
45  
46  
47  
48  
49

Table 2 Average daily nutrient intakes for women (N=13 602) participating in the EPIC-Norfolk study, from the FETA and CAFÉ programs, after the exclusion of outliers, with numbers and percentages of women who moved quintile

| Nutrient                | FETA program |      |      |      |       | CAFÉ program |      |      |      |       | Quintile        |      |            |     |
|-------------------------|--------------|------|------|------|-------|--------------|------|------|------|-------|-----------------|------|------------|-----|
|                         | Median       | Mean | SD   | Mini | Maxi  | Median       | Mean | SD   | Mini | Maxi  | Quintile change |      | change > 1 |     |
|                         |              |      |      | mum  | mum   |              |      |      | mum  | mum   | N               | %    | N          | %   |
| Energy (kcal)           | 1859         | 1925 | 546  | 538  | 4733  | 1853         | 1920 | 547  | 518  | 4643  | 1030            | 7.6  | 0          | 0.0 |
| Energy (kJ)             | 7833         | 8113 | 2296 | 2261 | 19910 | 7811         | 8091 | 2298 | 2179 | 19537 | 1018            | 7.5  | 0          | 0.0 |
| Protein (g)             | 79.8         | 81.5 | 21.1 | 23.0 | 246.0 | 79.6         | 81.3 | 21.0 | 22.7 | 246.1 | 495             | 3.6  | 1          | 0.0 |
| Alcohol (g)             | 2.0          | 5.6  | 8.4  | 0.0  | 99.5  | 2.0          | 5.6  | 8.4  | 0.0  | 99.5  | 0               | 0.0  | 0          | 0.0 |
| Carbohydrate (g)        | 237          | 247  | 77   | 59   | 766   | 235          | 245  | 77   | 58   | 766   | 974             | 7.2  | 1          | 0.0 |
| Starch (g)              | 107          | 112  | 39   | 13   | 405   | 106          | 111  | 39   | 13   | 406   | 1142            | 8.4  | 1          | 0.0 |
| Englyst fibre (g)       | 18.2         | 19.0 | 6.8  | 2.3  | 118.5 | 18.0         | 18.8 | 6.7  | 2.4  | 118.6 | 850             | 6.2  | 1          | 0.0 |
| Fat (g)                 | 67.0         | 70.8 | 27.1 | 11.7 | 221.0 | 67.2         | 71.2 | 27.3 | 11.6 | 217.2 | 1194            | 8.8  | 4          | 0.0 |
| Monounsaturated fat (g) | 22.5         | 24.1 | 9.9  | 3.8  | 100.3 | 22.5         | 24.1 | 9.9  | 3.5  | 100.6 | 1338            | 9.8  | 7          | 0.1 |
| Polyunsaturated fat (g) | 12.2         | 13.5 | 6.2  | 2.0  | 53.6  | 12.5         | 13.8 | 6.3  | 2.0  | 53.6  | 1434            | 10.5 | 23         | 0.2 |
| Saturated fat (g)       | 25.0         | 27.0 | 11.7 | 3.6  | 102.3 | 25.0         | 26.9 | 11.7 | 3.7  | 99.3  | 1443            | 10.6 | 9          | 0.1 |
| Calcium (mg)            | 971          | 992  | 290  | 128  | 3159  | 969          | 990  | 290  | 127  | 3159  | 390             | 2.9  | 4          | 0.0 |
| Iron (mg)               | 11.5         | 11.8 | 3.6  | 1.7  | 66.1  | 11.3         | 11.7 | 3.5  | 1.8  | 65.7  | 1496            | 11.0 | 12         | 0.1 |
| Potassium (mg)          | 3781         | 3861 | 942  | 1150 | 16568 | 3769         | 3848 | 939  | 1147 | 16587 | 486             | 3.6  | 1          | 0.0 |
| Carotene (mcg)          | 3477         | 3719 | 1917 | 67   | 61971 | 3469         | 3712 | 1917 | 64   | 61983 | 122             | 0.9  | 0          | 0.0 |

|    |                 |      |      |      |      |       |  |      |      |      |      |       |      |      |     |     |
|----|-----------------|------|------|------|------|-------|--|------|------|------|------|-------|------|------|-----|-----|
| 1  |                 |      |      |      |      |       |  |      |      |      |      |       |      |      |     |     |
| 2  |                 |      |      |      |      |       |  |      |      |      |      |       |      |      |     |     |
| 3  |                 |      |      |      |      |       |  |      |      |      |      |       |      |      |     |     |
| 4  | Folate (mcg)    | 322  | 332  | 103  | 65   | 2039  |  | 317  | 328  | 101  | 65   | 2024  | 1025 | 7.5  | 5   | 0.0 |
| 5  | Vitamin C (mg)  | 123  | 133  | 64   | 4    | 1006  |  | 125  | 135  | 64   | 4    | 1006  | 746  | 5.5  | 35  | 0.3 |
| 6  |                 |      |      |      |      |       |  |      |      |      |      |       |      |      |     |     |
| 7  | Vitamin D (mcg) | 3.01 | 3.46 | 1.90 | 0.00 | 17.83 |  | 3.02 | 3.45 | 1.90 | 0.00 | 17.75 | 1119 | 8.2  | 90  | 0.7 |
| 8  |                 |      |      |      |      |       |  |      |      |      |      |       |      |      |     |     |
| 9  | Vitamin E (mg)  | 12.4 | 13.8 | 6.2  | 1.5  | 52.4  |  | 12.2 | 13.5 | 6.0  | 1.6  | 49.8  | 1863 | 13.7 | 123 | 0.9 |
| 10 |                 |      |      |      |      |       |  |      |      |      |      |       |      |      |     |     |
| 11 |                 |      |      |      |      |       |  |      |      |      |      |       |      |      |     |     |
| 12 |                 |      |      |      |      |       |  |      |      |      |      |       |      |      |     |     |
| 13 |                 |      |      |      |      |       |  |      |      |      |      |       |      |      |     |     |
| 14 |                 |      |      |      |      |       |  |      |      |      |      |       |      |      |     |     |
| 15 |                 |      |      |      |      |       |  |      |      |      |      |       |      |      |     |     |
| 16 |                 |      |      |      |      |       |  |      |      |      |      |       |      |      |     |     |
| 17 |                 |      |      |      |      |       |  |      |      |      |      |       |      |      |     |     |
| 18 |                 |      |      |      |      |       |  |      |      |      |      |       |      |      |     |     |
| 19 |                 |      |      |      |      |       |  |      |      |      |      |       |      |      |     |     |
| 20 |                 |      |      |      |      |       |  |      |      |      |      |       |      |      |     |     |
| 21 |                 |      |      |      |      |       |  |      |      |      |      |       |      |      |     |     |
| 22 |                 |      |      |      |      |       |  |      |      |      |      |       |      |      |     |     |
| 23 |                 |      |      |      |      |       |  |      |      |      |      |       |      |      |     |     |
| 24 |                 |      |      |      |      |       |  |      |      |      |      |       |      |      |     |     |
| 25 |                 |      |      |      |      |       |  |      |      |      |      |       |      |      |     |     |
| 26 |                 |      |      |      |      |       |  |      |      |      |      |       |      |      |     |     |
| 27 |                 |      |      |      |      |       |  |      |      |      |      |       |      |      |     |     |
| 28 |                 |      |      |      |      |       |  |      |      |      |      |       |      |      |     |     |
| 29 |                 |      |      |      |      |       |  |      |      |      |      |       |      |      |     |     |
| 30 |                 |      |      |      |      |       |  |      |      |      |      |       |      |      |     |     |
| 31 |                 |      |      |      |      |       |  |      |      |      |      |       |      |      |     |     |
| 32 |                 |      |      |      |      |       |  |      |      |      |      |       |      |      |     |     |
| 33 |                 |      |      |      |      |       |  |      |      |      |      |       |      |      |     |     |
| 34 |                 |      |      |      |      |       |  |      |      |      |      |       |      |      |     |     |
| 35 |                 |      |      |      |      |       |  |      |      |      |      |       |      |      |     |     |
| 36 |                 |      |      |      |      |       |  |      |      |      |      |       |      |      |     |     |
| 37 |                 |      |      |      |      |       |  |      |      |      |      |       |      |      |     |     |
| 38 |                 |      |      |      |      |       |  |      |      |      |      |       |      |      |     |     |
| 39 |                 |      |      |      |      |       |  |      |      |      |      |       |      |      |     |     |
| 40 |                 |      |      |      |      |       |  |      |      |      |      |       |      |      |     |     |
| 41 |                 |      |      |      |      |       |  |      |      |      |      |       |      |      |     |     |
| 42 |                 |      |      |      |      |       |  |      |      |      |      |       |      |      |     |     |
| 43 |                 |      |      |      |      |       |  |      |      |      |      |       |      |      |     |     |
| 44 |                 |      |      |      |      |       |  |      |      |      |      |       |      |      |     |     |
| 45 |                 |      |      |      |      |       |  |      |      |      |      |       |      |      |     |     |
| 46 |                 |      |      |      |      |       |  |      |      |      |      |       |      |      |     |     |
| 47 |                 |      |      |      |      |       |  |      |      |      |      |       |      |      |     |     |
| 48 |                 |      |      |      |      |       |  |      |      |      |      |       |      |      |     |     |
| 49 |                 |      |      |      |      |       |  |      |      |      |      |       |      |      |     |     |

1  
2 217 **Food group intake data from FETA**

3  
4 218 Average daily intakes for both men and women of the fourteen food groups readily available from  
5  
6 219 FETA are shown in Table 3. Mean daily intakes of six of the food groups were higher in men than  
7  
8 220 in women: alcohol, cereals, fats, meat, potatoes and sugars. However, women had higher intakes of  
9  
10 221 fruit (278g v 212g) and vegetables (284g v 25+5g). Mean daily intakes of eggs, fish, milk, non-  
11  
12 222 alcoholic beverages, nuts and seeds, and soups and sauces were similar in both men and women.

13  
14 223 **The effect of text matching in FETA**

15  
16  
17 224 Tables 4 and 5 illustrate the variation in nutrient and food group intake data obtained in a random  
18  
19 225 subset of 1 159 men and 1 340 women, respectively, depending on whether text matching of milks,  
20  
21 226 breakfast cereals and baking and frying fats was applied. In general, mean nutrient intakes were  
22  
23 227 higher when text matching was carried out. In men, (Table 4), quintile changes (>15%) were most  
24  
25 228 evident in the following nutrients: Englyst fibre, polyunsaturated fat, folate, vitamin D and vitamin  
26  
27 229 E. The food group “cereals and cereal products” was the only one of the fourteen groups where  
28  
29 230 there was a difference, with 31 men moving 1 quintile.  
30  
31  
32 231 In women, (Table 5), quintile changes (>15%) were also most evident in the same five nutrients.  
33  
34 232 However, almost 21% of women also changed quintile for iron. Once again, the “cereals and cereal  
35  
36 233 products” food group was the only food group where there was any difference, with 40 women  
37  
38  
39 234 moving 1 quintile.  
40  
41  
42  
43  
44  
45  
46  
47  
48  
49  
50  
51  
52  
53  
54  
55  
56  
57  
58  
59  
60

Table 3 Average daily food group intakes for men (N=11 250) and women (N=13 602) participating in the EPIC-Norfolk study, from the FETA program

| Food group                    | Men    |      |     |          |          | Women  |      |     |          |          |
|-------------------------------|--------|------|-----|----------|----------|--------|------|-----|----------|----------|
|                               | Median | Mean | SD  | Mini mum | Maxi mum | Median | Mean | SD  | Mini mum | Maxi mum |
| Alcoholic beverages (g)       | 101    | 204  | 315 | 0        | 2483     | 23     | 64   | 109 | 0        | 1728     |
| Cereals & cereal products (g) | 242    | 260  | 127 | 0        | 1456     | 215    | 231  | 110 | 0        | 1172     |
| Eggs & egg dishes (g)         | 18     | 17   | 15  | 0        | 225      | 14     | 16   | 14  | 0        | 236      |
| Fats & oils (g)               | 31     | 36   | 22  | 0        | 207      | 27     | 30   | 20  | 0        | 218      |
| Fish & fish products (g)      | 32     | 37   | 26  | 0        | 362      | 32     | 38   | 26  | 0        | 309      |
| Fruit (g)                     | 179    | 212  | 164 | 0        | 2654     | 238    | 278  | 201 | 0        | 3742     |
| Meat & meat products (g)      | 99     | 106  | 54  | 0        | 856      | 91     | 94   | 48  | 0        | 606      |
| Milk & milk products (g)      | 407    | 420  | 182 | 0        | 1303     | 386    | 410  | 175 | 0        | 1560     |
| Non-alcoholic beverages (g)   | 1157   | 1177 | 396 | 0        | 3707     | 1150   | 1165 | 403 | 0        | 4501     |
| Nuts & seeds (g)              | 0      | 3    | 9   | 0        | 228      | 0      | 3    | 9   | 0        | 188      |
| Potatoes (g)                  | 125    | 122  | 69  | 0        | 1007     | 116    | 112  | 64  | 0        | 1506     |
| Soups & sauces (g)            | 43     | 58   | 54  | 0        | 1004     | 43     | 57   | 53  | 0        | 1376     |
| Sugars (g)                    | 53     | 64   | 50  | 0        | 572      | 37     | 48   | 42  | 0        | 541      |
| Vegetables (g)                | 236    | 255  | 123 | 0        | 2398     | 262    | 284  | 143 | 0        | 3539     |

1  
2  
3  
4  
5  
6  
7  
8  
9  
10  
11  
12  
13  
14  
15  
16  
17  
18  
19  
20  
21  
22  
23  
24  
25  
26  
27  
28  
29  
30  
31  
32  
33  
34  
35  
36  
37  
38  
39  
40  
41  
42  
43  
44  
45  
46  
47  
48  
49

Table 4 Comparison of average daily nutrient and food group intakes for men (N=1 159) participating in the EPIC-Norfolk study, from the FETA program, with and without the application of text matching

| Nutrient/Food group     | FETA program,<br>with text matching |      |      |             |             | FETA program, without text<br>matching |      |      |             |             | Quintile<br>change |      | Quintile<br>change > 1 |     |
|-------------------------|-------------------------------------|------|------|-------------|-------------|----------------------------------------|------|------|-------------|-------------|--------------------|------|------------------------|-----|
|                         | Median                              | Mean | SD   | Mini<br>mum | Maxi<br>mum | Median                                 | Mean | SD   | Mini<br>mum | Maxi<br>mum | N                  | %    | N                      | %   |
|                         | Energy (kcal)                       | 2095 | 2176 | 678         | 658         | 7766                                   | 2091 | 2170 | 678         | 658         | 7787               | 28   | 2.4                    | 0   |
| Energy (kJ)             | 8822                                | 9161 | 2848 | 2780        | 32555       | 8804                                   | 9138 | 2850 | 2780        | 32647       | 26                 | 2.2  | 0                      | 0.0 |
| Protein (g)             | 82.8                                | 85.0 | 22.8 | 22.1        | 272.3       | 82.5                                   | 84.7 | 22.8 | 22.1        | 272.3       | 34                 | 2.9  | 0                      | 0.0 |
| Alcohol (g)             | 7.2                                 | 12.3 | 16.1 | 0.0         | 112.9       | 7.2                                    | 12.3 | 16.1 | 0.0         | 112.9       | 0                  | 0.0  | 0                      | 0.0 |
| Carbohydrate (g)        | 261                                 | 270  | 93   | 63          | 1006        | 259                                    | 269  | 93   | 63          | 1003        | 48                 | 4.1  | 0                      | 0.0 |
| Starch (g)              | 120                                 | 127  | 49   | 7           | 643         | 121                                    | 126  | 48   | 7           | 636         | 65                 | 5.6  | 0                      | 0.0 |
| Englyst fibre (g)       | 17.5                                | 18.3 | 6.6  | 3.6         | 71.8        | 17.3                                   | 17.9 | 6.3  | 3.6         | 64.5        | 198                | 17.1 | 10                     | 0.9 |
| Fat (g)                 | 77.8                                | 82.1 | 33.1 | 12.8        | 387.8       | 77.3                                   | 82.1 | 33.1 | 12.8        | 389.3       | 32                 | 2.8  | 0                      | 0.0 |
| Monounsaturated fat (g) | 26.5                                | 28.2 | 12.2 | 3.5         | 131.1       | 26.7                                   | 28.7 | 12.5 | 3.7         | 138.7       | 88                 | 7.6  | 0                      | 0.0 |
| Polyunsaturated fat (g) | 13.5                                | 14.9 | 7.3  | 3.0         | 67.0        | 12.7                                   | 14.1 | 6.8  | 3.0         | 60.7        | 179                | 15.4 | 17                     | 1.5 |
| Saturated fat (g)       | 30.1                                | 31.8 | 14.1 | 3.3         | 160.0       | 30.3                                   | 32.2 | 14.3 | 3.3         | 160.3       | 72                 | 6.2  | 1                      | 0.1 |
| Calcium (mg)            | 1015                                | 1044 | 312  | 242         | 2848        | 1012                                   | 1044 | 313  | 242         | 2861        | 42                 | 3.6  | 0                      | 0.0 |
| Iron (mg)               | 11.9                                | 12.5 | 3.8  | 2.6         | 37.9        | 11.7                                   | 12.0 | 3.5  | 2.6         | 38.1        | 173                | 14.9 | 16                     | 1.4 |
| Potassium (mg)          | 3824                                | 3889 | 957  | 1353        | 12675       | 3812                                   | 3873 | 951  | 1353        | 12551       | 52                 | 4.5  | 0                      | 0.0 |



|    |                               |      |      |      |      |       |      |      |      |      |       |     |      |    |     |
|----|-------------------------------|------|------|------|------|-------|------|------|------|------|-------|-----|------|----|-----|
| 1  |                               |      |      |      |      |       |      |      |      |      |       |     |      |    |     |
| 2  |                               |      |      |      |      |       |      |      |      |      |       |     |      |    |     |
| 3  |                               |      |      |      |      |       |      |      |      |      |       |     |      |    |     |
| 4  | Carotene (mcg)                | 3150 | 3348 | 1671 | 507  | 18295 | 3162 | 3353 | 1672 | 507  | 18338 | 6   | 0.5  | 0  | 0.0 |
| 5  | Folate (mcg)                  | 325  | 333  | 103  | 94   | 1222  | 316  | 326  | 101  | 94   | 1262  | 226 | 19.5 | 2  | 0.2 |
| 6  | Vitamin C (mg)                | 105  | 113  | 55   | 17   | 619   | 104  | 112  | 55   | 17   | 619   | 22  | 1.9  | 0  | 0.0 |
| 7  | Vitamin D (mcg)               | 3.08 | 3.64 | 2.17 | 0.03 | 16.40 | 3.06 | 3.64 | 2.19 | 0.03 | 20.52 | 227 | 19.6 | 8  | 0.7 |
| 8  | Vitamin E (mg)                | 13.3 | 15.0 | 7.6  | 2.7  | 74.7  | 13.0 | 14.5 | 7.1  | 2.7  | 71.2  | 238 | 20.5 | 30 | 2.6 |
| 9  | Alcoholic beverages (g)       | 104  | 201  | 301  | 0    | 1866  | 104  | 201  | 301  | 0    | 1866  | 0   | 0.0  | 0  | 0.0 |
| 10 | Cereals & cereal products (g) | 240  | 257  | 131  | 0    | 1378  | 238  | 255  | 130  | 0    | 1378  | 31  | 2.7  | 0  | 0.0 |
| 11 | Eggs & egg dishes (g)         | 18   | 17   | 17   | 0    | 225   | 18   | 17   | 17   | 0    | 225   | 0   | 0.0  | 0  | 0.0 |
| 12 | Fats & oils (g)               | 31   | 36   | 25   | 0    | 313   | 31   | 36   | 25   | 0    | 313   | 0   | 0.0  | 0  | 0.0 |
| 13 | Fish & fish products (g)      | 32   | 37   | 25   | 0    | 153   | 32   | 37   | 25   | 0    | 153   | 0   | 0.0  | 0  | 0.0 |
| 14 | Fruit (g)                     | 184  | 216  | 158  | 0    | 1037  | 184  | 216  | 158  | 0    | 1037  | 0   | 0.0  | 0  | 0.0 |
| 15 | Meat & meat products (g)      | 98   | 104  | 52   | 0    | 690   | 98   | 104  | 52   | 0    | 690   | 0   | 0.0  | 0  | 0.0 |
| 16 | Milk & milk products (g)      | 414  | 428  | 187  | 0    | 1302  | 414  | 428  | 187  | 0    | 1302  | 0   | 0.0  | 0  | 0.0 |
| 17 | Non-alcoholic beverages (g)   | 1159 | 1191 | 397  | 22   | 3677  | 1159 | 1191 | 397  | 22   | 3677  | 0   | 0.0  | 0  | 0.0 |
| 18 | Nuts & seeds (g)              | 0    | 3    | 8    | 0    | 135   | 0    | 3    | 8    | 0    | 135   | 0   | 0.0  | 0  | 0.0 |
| 19 | Potatoes (g)                  | 125  | 121  | 78   | 0    | 1518  | 125  | 121  | 78   | 0    | 1518  | 0   | 0.0  | 0  | 0.0 |
| 20 | Soups & sauces (g)            | 43   | 56   | 51   | 0    | 556   | 43   | 56   | 51   | 0    | 556   | 0   | 0.0  | 0  | 0.0 |
| 21 | Sugars (g)                    | 51   | 63   | 50   | 0    | 358   | 51   | 63   | 50   | 0    | 358   | 0   | 0.0  | 0  | 0.0 |
| 22 | Vegetables (g)                | 238  | 256  | 128  | 15   | 1047  | 238  | 256  | 128  | 15   | 1047  | 0   | 0.0  | 0  | 0.0 |
| 23 |                               |      |      |      |      |       |      |      |      |      |       |     |      |    |     |
| 24 |                               |      |      |      |      |       |      |      |      |      |       |     |      |    |     |
| 25 |                               |      |      |      |      |       |      |      |      |      |       |     |      |    |     |
| 26 |                               |      |      |      |      |       |      |      |      |      |       |     |      |    |     |
| 27 |                               |      |      |      |      |       |      |      |      |      |       |     |      |    |     |
| 28 |                               |      |      |      |      |       |      |      |      |      |       |     |      |    |     |
| 29 |                               |      |      |      |      |       |      |      |      |      |       |     |      |    |     |
| 30 |                               |      |      |      |      |       |      |      |      |      |       |     |      |    |     |
| 31 |                               |      |      |      |      |       |      |      |      |      |       |     |      |    |     |
| 32 |                               |      |      |      |      |       |      |      |      |      |       |     |      |    |     |
| 33 |                               |      |      |      |      |       |      |      |      |      |       |     |      |    |     |
| 34 |                               |      |      |      |      |       |      |      |      |      |       |     |      |    |     |
| 35 |                               |      |      |      |      |       |      |      |      |      |       |     |      |    |     |
| 36 |                               |      |      |      |      |       |      |      |      |      |       |     |      |    |     |
| 37 |                               |      |      |      |      |       |      |      |      |      |       |     |      |    |     |
| 38 |                               |      |      |      |      |       |      |      |      |      |       |     |      |    |     |
| 39 |                               |      |      |      |      |       |      |      |      |      |       |     |      |    |     |
| 40 |                               |      |      |      |      |       |      |      |      |      |       |     |      |    |     |
| 41 |                               |      |      |      |      |       |      |      |      |      |       |     |      |    |     |
| 42 |                               |      |      |      |      |       |      |      |      |      |       |     |      |    |     |
| 43 |                               |      |      |      |      |       |      |      |      |      |       |     |      |    |     |
| 44 |                               |      |      |      |      |       |      |      |      |      |       |     |      |    |     |
| 45 |                               |      |      |      |      |       |      |      |      |      |       |     |      |    |     |
| 46 |                               |      |      |      |      |       |      |      |      |      |       |     |      |    |     |
| 47 |                               |      |      |      |      |       |      |      |      |      |       |     |      |    |     |
| 48 |                               |      |      |      |      |       |      |      |      |      |       |     |      |    |     |
| 49 |                               |      |      |      |      |       |      |      |      |      |       |     |      |    |     |

1  
2  
3  
4  
5  
6  
7  
8  
9  
10  
11  
12  
13  
14  
15  
16  
17  
18  
19  
20  
21  
22  
23  
24  
25  
26  
27  
28  
29  
30  
31  
32  
33  
34  
35  
36  
37  
38  
39  
40  
41  
42  
43  
44  
45  
46  
47  
48  
49

Table 5 Comparison of average daily nutrient and food group intakes for women (N=1 340) participating in the EPIC-Norfolk study, from the FETA program, with and without the application of text matching

| Nutrient/Food group     | FETA program, with text matching |      |      |      |       | FETA program, without text matching |      |      |      |       |                 |      |                     |     |
|-------------------------|----------------------------------|------|------|------|-------|-------------------------------------|------|------|------|-------|-----------------|------|---------------------|-----|
|                         | Median                           | Mean | SD   | Mini | Maxi  | Median                              | Mean | SD   | Mini | Maxi  | Quintile change |      | Quintile change > 1 |     |
|                         |                                  |      |      | mum  | mum   |                                     |      |      | mum  | mum   | N               | %    | N                   | %   |
|                         |                                  |      |      |      |       |                                     |      |      |      |       |                 |      |                     |     |
| Energy (kcal)           | 1886                             | 1946 | 607  | 608  | 8103  | 1880                                | 1941 | 605  | 608  | 8134  | 50              | 3.7  | 0                   | 0.0 |
| Energy (kJ)             | 7938                             | 8202 | 2554 | 2552 | 34410 | 7909                                | 8177 | 2547 | 2552 | 34541 | 47              | 3.5  | 0                   | 0.0 |
| Protein (g)             | 80.3                             | 82.5 | 22.2 | 26.8 | 277.0 | 79.9                                | 82.1 | 22.1 | 26.8 | 276.6 | 43              | 3.2  | 0                   | 0.0 |
| Alcohol (g)             | 2.0                              | 5.4  | 8.1  | 0.0  | 65.3  | 2.0                                 | 5.4  | 8.1  | 0.0  | 65.3  | 0               | 0.0  | 0                   | 0.0 |
| Carbohydrate (g)        | 238                              | 250  | 90   | 67   | 1596  | 237                                 | 249  | 90   | 67   | 1603  | 58              | 4.3  | 0                   | 0.0 |
| Starch (g)              | 109                              | 114  | 52   | 25   | 1288  | 108                                 | 114  | 52   | 25   | 1301  | 99              | 7.4  | 0                   | 0.0 |
| Englyst fibre (g)       | 18.6                             | 19.3 | 7.4  | 4.1  | 103.7 | 17.8                                | 18.7 | 7.1  | 3.3  | 97.2  | 247             | 18.4 | 13                  | 1.0 |
| Fat (g)                 | 67.6                             | 71.4 | 28.5 | 17.2 | 259.4 | 67.5                                | 71.3 | 28.4 | 17.2 | 259.7 | 45              | 3.4  | 0                   | 0.0 |
| Monounsaturated fat (g) | 22.7                             | 24.4 | 10.6 | 4.8  | 104.2 | 23.1                                | 24.6 | 10.6 | 4.8  | 103.8 | 133             | 9.9  | 0                   | 0.0 |
| Polyunsaturated fat (g) | 12.2                             | 13.6 | 6.2  | 2.6  | 42.5  | 11.5                                | 12.9 | 5.9  | 2.5  | 39.4  | 224             | 16.7 | 11                  | 0.8 |
| Saturated fat (g)       | 25.2                             | 27.2 | 12.4 | 5.1  | 109.6 | 25.5                                | 27.5 | 12.4 | 5.1  | 109.6 | 74              | 5.5  | 2                   | 0.1 |
| Calcium (mg)            | 978                              | 995  | 298  | 242  | 2528  | 976                                 | 992  | 297  | 242  | 2534  | 46              | 3.4  | 1                   | 0.1 |
| Iron (mg)               | 11.7                             | 11.9 | 3.9  | 3.1  | 67.8  | 11.1                                | 11.4 | 3.5  | 3.1  | 55.3  | 280             | 20.9 | 44                  | 3.3 |
| Potassium (mg)          | 3788                             | 3874 | 994  | 1284 | 12702 | 3744                                | 3848 | 987  | 1280 | 12526 | 68              | 5.1  | 0                   | 0.0 |

|    |                               |      |      |      |      |       |  |      |      |      |      |       |     |      |    |     |
|----|-------------------------------|------|------|------|------|-------|--|------|------|------|------|-------|-----|------|----|-----|
| 1  |                               |      |      |      |      |       |  |      |      |      |      |       |     |      |    |     |
| 2  |                               |      |      |      |      |       |  |      |      |      |      |       |     |      |    |     |
| 3  |                               |      |      |      |      |       |  |      |      |      |      |       |     |      |    |     |
| 4  | Carotene (mcg)                | 3489 | 3731 | 1705 | 178  | 13796 |  | 3500 | 3736 | 1707 | 175  | 13796 | 11  | 0.8  | 0  | 0.0 |
| 5  | Folate (mcg)                  | 326  | 337  | 107  | 102  | 1311  |  | 318  | 329  | 105  | 97   | 1276  | 291 | 21.7 | 1  | 0.1 |
| 6  | Vitamin C (mg)                | 124  | 133  | 63   | 4    | 809   |  | 122  | 132  | 62   | 4    | 809   | 34  | 2.5  | 0  | 0.0 |
| 7  | Vitamin D (mcg)               | 3.07 | 3.49 | 1.89 | 0.22 | 12.06 |  | 3.02 | 3.46 | 1.89 | 0.29 | 12.46 | 248 | 18.5 | 9  | 0.7 |
| 8  | Vitamin E (mg)                | 12.5 | 13.8 | 6.3  | 2.7  | 52.4  |  | 12.1 | 13.3 | 5.9  | 3.3  | 43.6  | 270 | 20.2 | 21 | 1.6 |
| 9  |                               |      |      |      |      |       |  |      |      |      |      |       |     |      |    |     |
| 10 |                               |      |      |      |      |       |  |      |      |      |      |       |     |      |    |     |
| 11 | Alcoholic beverages (g)       | 21   | 61   | 104  | 0    | 1350  |  | 21   | 61   | 104  | 0    | 1350  | 0   | 0.0  | 0  | 0.0 |
| 12 | Cereals & cereal products (g) | 214  | 236  | 174  | 9    | 4948  |  | 212  | 234  | 174  | 9    | 4948  | 40  | 3.0  | 0  | 0.0 |
| 13 | Eggs & egg dishes (g)         | 14   | 16   | 14   | 0    | 136   |  | 14   | 16   | 14   | 0    | 136   | 0   | 0.0  | 0  | 0.0 |
| 14 | Fats & oils (g)               | 27   | 30   | 19   | 0    | 133   |  | 27   | 30   | 19   | 0    | 133   | 0   | 0.0  | 0  | 0.0 |
| 15 | Fish & fish products (g)      | 32   | 39   | 26   | 0    | 187   |  | 32   | 39   | 26   | 0    | 187   | 0   | 0.0  | 0  | 0.0 |
| 16 | Fruit (g)                     | 238  | 277  | 199  | 0    | 2830  |  | 238  | 277  | 199  | 0    | 2830  | 0   | 0.0  | 0  | 0.0 |
| 17 | Meat & meat products (g)      | 90   | 95   | 49   | 0    | 392   |  | 90   | 95   | 49   | 0    | 392   | 0   | 0.0  | 0  | 0.0 |
| 18 | Milk & milk products (g)      | 381  | 410  | 174  | 0    | 959   |  | 381  | 410  | 174  | 0    | 959   | 0   | 0.0  | 0  | 0.0 |
| 19 | Non-alcoholic beverages (g)   | 1148 | 1153 | 404  | 8    | 3215  |  | 1148 | 1153 | 404  | 8    | 3215  | 0   | 0.0  | 0  | 0.0 |
| 20 | Nuts & seeds (g)              | 0    | 3    | 11   | 0    | 180   |  | 0    | 3    | 11   | 0    | 180   | 0   | 0.0  | 0  | 0.0 |
| 21 | Potatoes (g)                  | 116  | 113  | 61   | 0    | 785   |  | 116  | 113  | 61   | 0    | 785   | 0   | 0.0  | 0  | 0.0 |
| 22 | Soups & sauces (g)            | 45   | 57   | 53   | 0    | 900   |  | 45   | 57   | 53   | 0    | 900   | 0   | 0.0  | 0  | 0.0 |
| 23 | Sugars (g)                    | 38   | 50   | 46   | 0    | 540   |  | 38   | 50   | 46   | 0    | 540   | 0   | 0.0  | 0  | 0.0 |
| 24 | Vegetables (g)                | 265  | 288  | 140  | 2    | 1387  |  | 265  | 288  | 140  | 2    | 1387  | 0   | 0.0  | 0  | 0.0 |
| 25 |                               |      |      |      |      |       |  |      |      |      |      |       |     |      |    |     |
| 26 |                               |      |      |      |      |       |  |      |      |      |      |       |     |      |    |     |
| 27 |                               |      |      |      |      |       |  |      |      |      |      |       |     |      |    |     |
| 28 |                               |      |      |      |      |       |  |      |      |      |      |       |     |      |    |     |
| 29 |                               |      |      |      |      |       |  |      |      |      |      |       |     |      |    |     |
| 30 |                               |      |      |      |      |       |  |      |      |      |      |       |     |      |    |     |
| 31 |                               |      |      |      |      |       |  |      |      |      |      |       |     |      |    |     |
| 32 |                               |      |      |      |      |       |  |      |      |      |      |       |     |      |    |     |
| 33 |                               |      |      |      |      |       |  |      |      |      |      |       |     |      |    |     |
| 34 |                               |      |      |      |      |       |  |      |      |      |      |       |     |      |    |     |
| 35 |                               |      |      |      |      |       |  |      |      |      |      |       |     |      |    |     |
| 36 |                               |      |      |      |      |       |  |      |      |      |      |       |     |      |    |     |
| 37 |                               |      |      |      |      |       |  |      |      |      |      |       |     |      |    |     |
| 38 |                               |      |      |      |      |       |  |      |      |      |      |       |     |      |    |     |
| 39 |                               |      |      |      |      |       |  |      |      |      |      |       |     |      |    |     |
| 40 |                               |      |      |      |      |       |  |      |      |      |      |       |     |      |    |     |
| 41 |                               |      |      |      |      |       |  |      |      |      |      |       |     |      |    |     |
| 42 |                               |      |      |      |      |       |  |      |      |      |      |       |     |      |    |     |
| 43 |                               |      |      |      |      |       |  |      |      |      |      |       |     |      |    |     |
| 44 |                               |      |      |      |      |       |  |      |      |      |      |       |     |      |    |     |
| 45 |                               |      |      |      |      |       |  |      |      |      |      |       |     |      |    |     |
| 46 |                               |      |      |      |      |       |  |      |      |      |      |       |     |      |    |     |
| 47 |                               |      |      |      |      |       |  |      |      |      |      |       |     |      |    |     |
| 48 |                               |      |      |      |      |       |  |      |      |      |      |       |     |      |    |     |
| 49 |                               |      |      |      |      |       |  |      |      |      |      |       |     |      |    |     |

1  
2 243 **DISCUSSION**

3 244 FETA provides a new, freely available, standalone tool that can produce nutrient and food group  
4  
5 245 intake values from data collected using the EPIC-Norfolk FFQ. It makes the EPIC-Norfolk FFQ  
6  
7 246 readily accessible to end-users and enables them to process and analyse nutritional data. The data  
8  
9 247 can either be entered into a spreadsheet, using the instructions provided, or by using the  
10  
11 248 specifically developed Microsoft Access form-based entry tool. The Access entry tool allows  
12  
13 249 easier entry without requiring knowledge of specific food codes. The software for FETA for  
14  
15 250 Windows and Linux can be downloaded from the website, as can the Microsoft Access data entry  
16  
17 251 utility (<http://www.srl.cam.ac.uk/epic/epicffq/>). Users are encouraged to register with EPIC-  
18  
19 252 Norfolk, as this enables them to request assistance and support. The various types of output (with  
20  
21 253 four levels of information) available should prove beneficial to researchers, especially those  
22  
23 254 requiring more detailed information. There is an on-going need for information on the intake of  
24  
25 255 food groups. While the data from either output 3 or 4 could be used to generate more detailed  
26  
27 256 food group data, we have treated food groups as another type of nutrient – a pseudo-nutrient. The  
28  
29 257 FETA input/look-up files can be easily modified to create new groups, greatly adding to the  
30  
31 258 flexibility of the system for analysing food group consumption, while requiring no spreadsheet or  
32  
33 259 programming skills on the part of the analyst. A helpful feature of FETA is the log file which  
34  
35 260 documents errors relating to FFQ data and/or default food codes assigned.  
36  
37 261 FETA was designed and based on the extensively validated EPIC-Norfolk FFQ, originally  
38  
39 262 developed in 1988, to assess the nutrient and food group intake of 40-79 year olds, who  
40  
41 263 completed the FFQ between 1993 and 1997. The food list and look-up lists of milks, breakfast  
42  
43 264 cereals and fats reflect this time period and the study population, as do the default milk, cereal,  
44  
45 265 baking fat and frying fat codes assigned. However, the program was created in such a way that it  
46  
47 266 can be customised for different study populations, easily enabled by the separation of the  
48  
49 267 processing algorithm in the FETA program implementation from the data model text files. It is  
50  
51 268 possible to delete/add foods and/or FFQ lines, and modify portion sizes as desired for a study.  
52  
53  
54  
55  
56  
57  
58  
59  
60

1  
2 269 Comparisons were carried out for a number of selected nutrients obtained from FETA and the  
3  
4 270 previously validated CAFÉ program. These showed that the nutrient output from both programs  
5  
6 271 were generally similar. All differences (>0.1%) found from the comparison of detailed  
7  
8 272 food/nutrient data at the individual level for 12 500 participants from FETA and the CAFÉ  
9  
10 273 program can be explained by one or more of the following reasons: up to four cereal foods  
11  
12 274 assigned by FETA, as compared to a maximum of two cereal foods assigned by CAFÉ;  
13  
14 275 differences in default baking and frying fat codes assigned; correction for muesli portion size in  
15  
16 276 cereal data; exclusion of porridge from cereal data (free text); default codes assigned for milk,  
17  
18 277 cereals or fats to participants using FETA (where no food codes were assigned by CAFÉ  
19  
20 278 program); rounding error (only where percentage absolute differences were between 0.1 to 1%)  
21  
22 279 and changes made to the nutrient data of six of the nine new foods as well as to the default code  
23  
24 280 for milk. Although nutrient intakes as calculated by FETA and CAFÉ were similar, some  
25  
26 281 relatively small differences existed, but these and the quintile shift of men and women can be  
27  
28 282 explained. In FETA, a number of changes were made to the processing of breakfast cereals,  
29  
30 283 affecting carbohydrate, starch, Englyst fibre, iron and folate estimates. The vitamin C content per  
31  
32 284 100g of low calorie/diet fizzy drinks was changed from 5 to 0 mg and the vitamin E content of  
33  
34 285 crunchy oat cereal and oil and fat non-specific was increased. Changes made to the processing of  
35  
36 286 fats in Questions 6 and 7 in Part 2 of the FFQ, in addition to changes made to the fatty acid  
37  
38 287 profile of the three new fats, could help explain the small differences observed in  
39  
40 288 monounsaturated, polyunsaturated and saturated fat intakes.  
41  
42 289 There was quite a large range in intake in the fourteen food groups, with a minimum intake of  
43  
44 290 zero for each of the food groups. It is difficult to compare food group intake data as the groupings  
45  
46 291 of foods often varies. However, the combined mean intake of fruit (excluding juices) and  
47  
48 292 vegetables for men and women was 467g and 562g respectively, achieving the Government's  
49  
50 293 'Five a day' recommendation(23), using a portion size of 80 g.  
51  
52  
53  
54  
55  
56  
57  
58  
59  
60

1  
2 294 Whilst text matching only affected one food group (cereals and cereal products), more than 15%  
3  
4 295 of men and women changed quintile for a number of nutrients: Englyst fibre, polyunsaturated fat,  
5  
6 296 folate, vitamin D and vitamin E, and iron (women only). Yet again, these nutrients related to the  
7  
8 297 text matching of breakfast cereals and baking and frying fats. The inclusion of these data  
9  
10 298 illustrates the effect of text matching on the ranking of individuals for certain nutrients and will  
11  
12 299 enable future researchers using FETA to make informed decisions on the benefit of text matching  
13  
14 300 for their study.

15  
16  
17 301 We have not addressed or discussed common FFQ issues, such as the number of items in a food  
18  
19 302 list or the use of a single average portion size, as these are not the focus of this paper and have  
20  
21 303 been reviewed previously (24,25).

22  
23 304 It is anticipated that future updates of FETA might contain a number of improvements and  
24  
25 305 overcome some of the limitations of FETA, currently released as version 2.53 for Windows and  
26  
27 306 Linux (last updated 15/03/2013 and 21/02/2013 respectively). The source code has been made  
28  
29 307 available online which enables users to make modifications and improvements to the program.  
30  
31 308 Currently, we have made available Windows and Linux versions and it is hoped that an OS X  
32  
33 309 version will follow soon. We are currently working on a Libreoffice version of the Microsoft  
34  
35 310 Access form-based entry tool.

36  
37  
38 311 In conclusion, we have created a new, open source, standalone, cross-platform FFQ processing  
39  
40 312 tool, FETA, to produce nutrient and food group data for researchers using the EPIC-Norfolk  
41  
42 313 FFQ. The tool produces similar nutrient and food group values to the previously validated CAFÉ  
43  
44 314 program, but is more accessible. Although FETA was designed and based on the EPIC-Norfolk  
45  
46 315 FFQ, the program was created in such a way that it can be customised for different study  
47  
48 316 populations. It is anticipated that the development and availability of FETA will be a useful  
49  
50 317 addition to the field of nutritional epidemiology and dietary public health.  
51  
52

53  
54  
55 318

56  
57 319 **Acknowledgments**  
58  
59  
60

1  
2 320 We thank Mr Adam Dickinson, senior data manager at the MRC Epidemiology Unit, and his  
3  
4 321 team members for their contribution to project management of FETA; Professor Nick Wareham,  
5  
6 322 as EPIC-Norfolk study PI; and Mr Jamal Natour, as FETA software developer. The authors  
7  
8 323 would also like to thank all the participants of the EPIC-Norfolk study and the EPIC-Norfolk  
9  
10 324 staff for their help with this work.

### 12 325 **Contributors**

13  
14 326 AAM contributed to the software development, assisted in statistical analyses and drafted the  
15  
16  
17 327 manuscript. AB and RL contributed to the software development, assisted in statistical analyses  
18  
19 328 and contributed to the manuscript. DJP-S wrote the step-based graphical wizard for running  
20  
21 329 FETA and contributed to the manuscript. NGF, LO'C and K-TK (Principal Investigator of EPIC-  
22  
23 330 Norfolk) contributed to the manuscript. APK created the Microsoft Access form-based entry tool  
24  
25 331 and contributed to the manuscript. All authors approved the final manuscript.

### 28 332 **Funding**

29  
30 333 This study was supported by programme grants from the MRC Population Health Sciences  
31  
32 334 Research Network (PHSRN), Cancer Research UK (C864/A8257) and the Medical Research  
33  
34 335 Council (G0401527 and G1000143); NGF was supported by the Medical Research Council  
35  
36 336 (MC\_UP\_A100\_1003); APK is funded by a Wellcome Trust Clinical Research Fellowship.

37  
38 337 **Competing interests** None.

39  
40 338 **Ethics approval** Norwich Local Research Ethics Committee.

41  
42 339

### 46 340 **References**

- 47  
48  
49 341 1. Subar AF. Developing dietary assessment tools. J Am Diet Assoc 2004 May;104(5):769–  
50  
51 342 70. [www.ncbi.nlm.nih.gov/pubmed/15127062](http://www.ncbi.nlm.nih.gov/pubmed/15127062) (accessed 5 Nov 2013).

- 1  
2 343 2. Welch AA, Luben R, Khaw KT, et al. The CAFE computer program for nutritional  
3  
4 344 analysis of the EPIC-Norfolk food frequency questionnaire and identification of extreme  
5  
6 345 nutrient values. *J Hum Nutr Diet* 2005;**18**(2):99–116.  
7  
8  
9 346 3. Bingham SA, Gill C, Welch A, et al. Validation of dietary assessment methods in the UK  
10  
11 347 arm of EPIC using weighed records, and 24-hour urinary nitrogen and potassium and  
12  
13 348 serum vitamin C and carotenoids as biomarkers. *Int J Epidemiol* 1997;**26**(1):S137–S151.  
14  
15  
16  
17 349 4. Bingham SA, Welch AA, McTaggart A, et al. Nutritional methods in the European  
18  
19 350 Prospective Investigation of Cancer in Norfolk. *Public Health Nutr* 2001;**4**(3):847–58.  
20  
21  
22  
23 351 5. McKeown NM, Day NE, Welch AA, et al. Use of biological markers to validate self-  
24  
25 352 reported dietary intake in a random sample of the European Prospective Investigation into  
26  
27 353 Cancer United Kingdom Norfolk cohort. *Am J Clin Nutr* 2001;**74**:188–96.  
28  
29  
30  
31 354 6. Rimm EB, Giovannucci EL, Stampfer MJ, et al. Reproducibility and validity of an  
32  
33 355 expanded self-administered semiquantitative food frequency questionnaire among male  
34  
35 356 health professionals. *Am J Epidemiol* 1992 May;**135**(10):1114–26.  
36  
37 357 [www.ncbi.nlm.nih.gov/pubmed/1632423](http://www.ncbi.nlm.nih.gov/pubmed/1632423) (accessed 5 Nov 2013).  
38  
39  
40  
41 358 7. Bingham SA, Gill C, Welch A, et al. Comparison of dietary assessment methods in  
42  
43 359 nutritional epidemiology: weighed records v. 24 h recalls, food-frequency questionnaires  
44  
45 360 and estimated-diet records. *Br J Nutr* 1994;**72**(4):619–43.  
46  
47  
48  
49 361 8. Day N, Oakes S, Luben R, et al. EPIC-Norfolk: study design and characteristics of the  
50  
51 362 cohort. *European Prospective Investigation of Cancer. Br J Cancer* 1999 Jul;**80**(Suppl  
52  
53 363 1):95–103. [www.ncbi.nlm.nih.gov/pubmed/10466767](http://www.ncbi.nlm.nih.gov/pubmed/10466767) (accessed 5 Nov 2013).  
54  
55  
56  
57 364 9. Gregory J, Foster K, Tyler H, Wiseman M. *The Dietary and Nutritional Survey of British*  
58  
59 365 *Adults*. London: Her Majesty's Stationary Office (HMSO) 1990.  
60



- 1  
2 366 10. MAFF. The Dietary and Nutritional Survey of British Adults - Further Analysis. London:  
3  
4 367 Her Majesty's Stationary Office (HMSO) 1994.  
5  
6  
7 368 11. MAFF. Food Portion Sizes. 2nd ed. London: Her Majesty's Stationary Office (HMSO)  
8  
9 369 1993.  
10  
11  
12 370 12. Holland B, Unwin I, Buss D. Cereals and cereal products. The third supplement to  
13 371 McCance & Widdowson's The Composition of Foods (4th Edition). Cambridge:  
14  
15 372 RSC/MAFF 1988.  
16  
17  
18  
19 373 13. Holland B, Unwin I, Buss D. Milk products and eggs. The fourth supplement to McCance  
20  
21 374 & Widdowson's The Composition of Foods (4th Edition). Cambridge: RSC/MAFF 1989.  
22  
23  
24  
25 375 14. Holland B, Welch AA, Unwin D, Buss DH, Paul AA, Southgate DAT. McCance and  
26 376 Widdowson's The Composition of Foods. Cambridge: Royal Society of Chemistry (RSC)  
27  
28 377 1991.  
29  
30  
31  
32  
33 378 15. Holland B, Unwin I, Buss D. Vegetables, herbs and spices. The fifth supplement to  
34 379 McCance & Widdowson's The Composition of Foods (4th Edition). Cambridge:  
35  
36 380 RSC/MAFF 1991.  
37  
38  
39  
40  
41 381 16. Holland B, Unwin I, Buss D. Fruit and nuts. The first supplement to McCance &  
42 382 Widdowson's The Composition of Foods (5th Edition). Cambridge: RSC/MAFF 1992.  
43  
44  
45  
46 383 17. Holland B, Welch A, Buss D. Vegetable dishes. The second supplement to McCance &  
47 384 Widdowson's The Composition of Foods (5th Edition). Cambridge: RSC/MAFF 1992.  
48  
49  
50  
51  
52 385 18. Holland B, Brown J, Buss D. Fish and fish products. The third supplement to McCance &  
53 386 Widdowson's The Composition of Foods (5th Edition). Cambridge: RSC/MAFF 1993.  
54  
55  
56  
57  
58  
59  
60

- 1  
2 387 19. Chan W, Brown J, Buss D. Miscellaneous foods. The fourth supplement to McCance &  
3  
4 388 Widdowson's The Composition of Foods (5th Edition). Cambridge: RSC/MAFF 1994.  
5  
6  
7 389 20. Chan W, Brown J, Lee S, Buss D. Meat, poultry and game. The fifth supplement to  
8  
9 390 McCance & Widdowson's The Composition of Foods (5th Edition). Cambridge:  
10  
11 391 RSC/MAFF 1995.  
12  
13  
14  
15 392 21. Chan W, Brown J, Church S, Buss D. Meat products and dishes. The sixth supplement to  
16  
17 393 McCance & Widdowson's The Composition of Foods (5th Edition). Cambridge:  
18  
19 394 RSC/MAFF 1996.  
20  
21  
22  
23 395 22. COMA. Dietary Reference Values for Food Energy and Nutrients for the United Kingdom.  
24  
25 396 London: Her Majesty's Stationary Office (HMSO) 1991.  
26  
27  
28 397 23. Department of Health. [www.nhs.uk/Livewell/5ADAY/Pages/5ADAYhome.aspx](http://www.nhs.uk/Livewell/5ADAY/Pages/5ADAYhome.aspx)  
29  
30 398 (accessed 5 Nov 2013).  
31  
32  
33  
34 399 24. Cade JE, Burley VJ, Warm DL, et al. Food-frequency questionnaires: a review of their  
35  
36 400 design, validation and utilisation. *Nutr Res Rev* 2004 Jun;**17**(1):5–22.  
37  
38 401 [www.ncbi.nlm.nih.gov/pubmed/19079912](http://www.ncbi.nlm.nih.gov/pubmed/19079912) (accessed 30 Oct 2013).  
39  
40  
41  
42 402 25. Molag ML, de Vries JHM, Ocké MC, et al. Design characteristics of food frequency  
43  
44 403 questionnaires in relation to their validity. *Am J Epidemiol* 2007 Dec;**166**(12):1468–78.  
45  
46 404 [www.ncbi.nlm.nih.gov/pubmed/17881382](http://www.ncbi.nlm.nih.gov/pubmed/17881382) (accessed 5 Nov 2013).  
47  
48  
49  
50  
51  
52  
53  
54  
55  
56  
57  
58  
59  
60

| FOODS AND AMOUNTS                                           | AVERAGE USE LAST YEAR         |               |             |              |              |            |             |             |            |
|-------------------------------------------------------------|-------------------------------|---------------|-------------|--------------|--------------|------------|-------------|-------------|------------|
|                                                             | Never or less than once/month | 1-3 per month | Once a week | 2-4 per week | 5-6 per week | Once a day | 2-3 per day | 4-5 per day | 6+ per day |
| <b>BREAD AND SAVOURY BISCUITS</b><br>(one slice or biscuit) |                               |               |             |              |              |            |             |             |            |
| White bread and rolls                                       |                               |               |             |              |              | √          |             |             |            |
| Brown bread and rolls                                       |                               |               |             | √            |              |            |             |             |            |
| Wholemeal bread and rolls                                   | √                             |               |             |              |              |            |             |             |            |
| Cream crackers, cheese biscuits                             |                               | √             |             |              |              |            |             |             |            |
| Crispbread, eg. Ryvita                                      |                               | √             |             |              |              |            |             |             |            |
| <b>CEREALS</b> (one bowl)                                   |                               |               |             |              |              |            |             |             |            |
| Porridge, Readybrek                                         |                               |               |             | √            |              |            |             |             |            |
| Breakfast cereal such as cornflakes, muesli etc.            |                               |               |             |              | √            |            |             |             |            |

**Figure 1. Part 1 (main part) of the EPIC-Norfolk FFQ, illustrating bread, savoury biscuits and breakfast cereals**

1  
2  
3  
4  
5  
6  
7  
8  
9  
10  
11  
12  
13  
14  
15  
16  
17  
18  
19  
20  
21  
22  
23  
24  
25  
26  
27  
28  
29  
30  
31  
32  
33  
34  
35  
36  
37  
38  
39  
40  
41  
42  
43  
44  
45  
46  
47  
48  
49  
50  
51  
52  
53  
54  
55  
56  
57  
58  
59  
60

3. What type of milk did you most often use?  
**Select one only** Full cream, silver  Semi-skimmed, red/white   
 Skimmed/blue  Channel Islands, gold   
 Dried milk  Soya   
 Other, specify  None

4. How much milk did you drink each day, including milk with tea, coffee, cereals etc?  
 None  Three quarters of a pint   
 Quarter of a pint  One pint   
 Half a pint  More than one pint

5. Did you usually eat breakfast cereal (excluding porridge and Ready Brek mentioned earlier)?  
 Yes  No

**If yes, which brand and type of breakfast cereal, including muesli, did you usually eat?**  
**List the one or two types most often used**  
 Brand *e.g. Kellogg's*  Type *e.g. cornflakes*

6. What kind of fat did you most often use for frying, roasting, grilling etc?  
**Select one only** Butter  Solid vegetable fat   
 Lard/dripping  Margarine   
 Vegetable oil  None   
**If you used vegetable oil**, please give type eg. corn, sunflower

7. What kind of fat did you most often use for baking cakes etc?  
**Select one only** Butter  Solid vegetable fat   
 Lard/dripping  Margarine   
 Vegetable oil  None   
**If you used margarine**, please give name or type eg. Flora, Stork

10. What did you do with the visible fat on your meat?  
 Ate most of the fat  Ate as little as possible   
 Ate some of the fat  Did not eat meat

Figure 2. Questions from part 2 of the EPIC-Norfolk FFQ, used by FETA

1  
2  
3  
4 1 Appendix 1 Extract from a sample log file produced during the processing of 10 ids, using output 1.  
5  
6 2 2013-01-29 11:54 am: Note : Starting database setup  
7  
8 3 2013-01-29 11:54 am: Note : Loading imports for 'foods' completed  
9  
10 4 2013-01-29 11:54 am: Note : Loading imports for 'meals' completed  
11  
12 5 2013-01-29 11:54 am: Note : Loading imports for 'nutrients' completed  
13  
14 6 2013-01-29 11:54 am: Note : Loading imports for 'food\_nutrients' completed  
15  
16 7 2013-01-29 11:54 am: Note : Loading imports for 'meal\_foods' completed  
17  
18 8 2013-01-29 11:54 am: Note : Loading imports for 'weights' completed  
19  
20 9 2013-01-29 11:54 am: Note : Loading imports for 'portions' completed  
21  
22 10 2013-01-29 11:54 am: Note : Loading imports for 'frequencies' completed  
23  
24 11 2013-01-29 11:54 am: Note : Loading imports for 'cereals' completed  
25  
26 12 2013-01-29 11:54 am: Note : Loading imports for 'milks' completed  
27  
28 13 2013-01-29 11:54 am: Note : Completed database setup  
29  
30 14  
31  
32  
33 15 2013-01-29 11:54 am: Error: Respondent: 001A supplied invalid frequency: -9 for meal: BURGER  
34  
35 16 2013-01-29 11:54 am: Error: Respondent: 001A supplied invalid frequency: -9 for meal: LIVER  
36  
37 17 2013-01-29 11:54 am: Error: Respondent: 003C supplied no baking fat food\_codes  
38  
39  
40  
41  
42  
43  
44  
45  
46  
47  
48  
49

1  
2  
3  
4 18 2013-01-29 11:54 am: Note : Respondent: 003C using default baking fat code: 17018  
5  
6 19 2013-01-29 11:54 am: Error: Respondent: 004D supplied invalid frequency: -9 for meal: FRUIT\_SQUASH  
7  
8 20 2013-01-29 11:54 am: Error: Respondent: 005E supplied invalid frequency: -9 for meal: CHICKEN  
9  
10 21 2013-01-29 11:54 am: Error: Respondent: 005E supplied no frying fat food\_codes  
11  
12 22 2013-01-29 11:54 am: Note : Respondent: 005E using default frying fat code: 17046  
13  
14 23 2013-01-29 11:54 am: Error: Respondent: 008H supplied invalid frequency: -9 for meal: INSTANT\_COFFEE  
15  
16 24 2013-01-29 11:54 am: Error: Respondent: 008H supplied no baking fat food\_codes  
17  
18 25 2013-01-29 11:54 am: Note : Respondent: 008H using default baking fat code: 17018  
19  
20 26 2013-01-29 11:54 am: Error: Respondent: 009J supplied invalid frequency: -9 for meal: DAIRY\_DESSERT  
21  
22 27 2013-01-29 11:54 am: Error: Respondent: 009J supplied invalid frequency: -4 for meal: EGGS  
23  
24 28 2013-01-29 11:54 am: Error: Respondent: 009J supplied invalid frequency: -9 for meal: LOWCAL\_SALAD\_CREAM  
25  
26 29 2013-01-29 11:54 am: Error: Respondent: 009J supplied invalid frequency: -9 for meal: PLAIN\_BISCUIT  
27  
28 30 2013-01-29 11:54 am: Error: Respondent: 009J supplied invalid frequency: -9 for meal: INSTANT\_COFFEE  
29  
30 31 2013-01-29 11:54 am: Error: Respondent: 009J supplied invalid frequency: -9 for meal: COFFEE\_WHITENER  
31  
32 32 2013-01-29 11:54 am: Error: Respondent: 009J supplied invalid frequency: -9 for meal: SPINACH  
33  
34 33 2013-01-29 11:54 am: Error: Respondent: 009J supplied no visible fat weighting  
35  
36 34 2013-01-29 11:54 am: Note : Respondent: 009J using default weighting: 1  
37  
38  
39  
40  
41  
42  
43  
44  
45  
46  
47  
48  
49

1  
2  
3  
4 35 2013-01-29 11:54 am: Error: Respondent: 010K supplied no visible fat weighting  
5  
6  
7 36 2013-01-29 11:54 am: Note : Respondent: 010K using default weighting: 1  
8  
9 37 2013-01-29 11:54 am: Note : Processing completed for Respondent: 001A  
10  
11 38 2013-01-29 11:54 am: Note : Processing completed for Respondent: 002B  
12  
13 39 2013-01-29 11:54 am: Note : Processing completed for Respondent: 003C  
14  
15 40 2013-01-29 11:54 am: Note : Processing completed for Respondent: 004D  
16  
17  
18 41 2013-01-29 11:54 am: Note : Processing completed for Respondent: 005E  
19  
20 42 2013-01-29 11:54 am: Note : Processing completed for Respondent: 006F  
21  
22 43 2013-01-29 11:54 am: Note : Processing completed for Respondent: 007G  
23  
24 44 2013-01-29 11:54 am: Note : Processing completed for Respondent: 008H  
25  
26 45 2013-01-29 11:54 am: Note : Processing completed for Respondent: 009J  
27  
28  
29 46 2013-01-29 11:54 am: Note : Processing completed for Respondent: 010K  
30  
31 47 2013-01-29 11:54 am: Note : Questionnaire: sample\_input\_290113.csv processing completed successfully, processed(10) respondents  
32  
33 48  
34  
35  
36  
37  
38  
39  
40  
41  
42  
43  
44  
45  
46  
47  
48  
49



**A new tool for converting food frequency questionnaire data into nutrient and food group values: FETA research methods and availability**

|                                 |                                                                                                                                                                                                                                                                                                                                                                                                                                                                                                                                                                                                    |
|---------------------------------|----------------------------------------------------------------------------------------------------------------------------------------------------------------------------------------------------------------------------------------------------------------------------------------------------------------------------------------------------------------------------------------------------------------------------------------------------------------------------------------------------------------------------------------------------------------------------------------------------|
| Journal:                        | <i>BMJ Open</i>                                                                                                                                                                                                                                                                                                                                                                                                                                                                                                                                                                                    |
| Manuscript ID:                  | bmjopen-2013-004503.R1                                                                                                                                                                                                                                                                                                                                                                                                                                                                                                                                                                             |
| Article Type:                   | Research                                                                                                                                                                                                                                                                                                                                                                                                                                                                                                                                                                                           |
| Date Submitted by the Author:   | 04-Mar-2014                                                                                                                                                                                                                                                                                                                                                                                                                                                                                                                                                                                        |
| Complete List of Authors:       | Mulligan, Angela; University of Cambridge, Public Health & Primary Care<br>Luben, Robert; University of Cambridge, Public Health & Primary Care<br>Bhaniani, Amit; University of Cambridge, Public Health & Primary Care<br>Parry-Smith, David; University of Cambridge, Public Health & Primary Care<br>O'Connor, Laura; University of Cambridge, Institute of Metabolic Science<br>Khawaja, Anthony; University of Cambridge, Public Health & Primary Care<br>Forouhi, Nita; University of Cambridge, Institute of Metabolic Science<br>Khaw, KayTee; University of Cambridge, Clinical Medicine |
| <b>Primary Subject Heading</b>: | Research methods                                                                                                                                                                                                                                                                                                                                                                                                                                                                                                                                                                                   |
| Secondary Subject Heading:      | Health informatics, Public health, Nutrition and metabolism, Epidemiology                                                                                                                                                                                                                                                                                                                                                                                                                                                                                                                          |
| Keywords:                       | PUBLIC HEALTH, EPIDEMIOLOGY, Nutrient intakes, food frequency questionnaire                                                                                                                                                                                                                                                                                                                                                                                                                                                                                                                        |
|                                 |                                                                                                                                                                                                                                                                                                                                                                                                                                                                                                                                                                                                    |

SCHOLARONE™  
Manuscripts

Only



1  
2  
3  
4  
5  
6  
7  
8  
9  
10  
11  
12  
13  
14  
15  
16  
17  
18  
19  
20  
21  
22  
23  
24  
25  
26  
27  
28  
29  
30  
31  
32  
33  
34  
35  
36  
37  
38  
39  
40  
41  
42  
43  
44  
45  
46  
47  
48  
49  
50  
51  
52  
53  
54  
55  
56  
57  
58  
59  
60

1  
2  
3 A new tool for converting food frequency questionnaire data into nutrient and food group values:  
4 FETA research methods and availability

5  
6  
7 Angela A Mulligan<sup>a1 c1</sup>, Robert N Luben<sup>a1</sup>, Amit Bhaniani<sup>a1</sup>, David J Parry-Smith<sup>a1</sup>, Laura  
8 O'Connor<sup>a2</sup>, Anthony P Khawaja<sup>a1</sup>, Nita G Forouhi<sup>\*a2</sup>, Kay-Tee Khaw<sup>\*a1, a3</sup>

9 \* indicates equal contribution as authors

10 <sup>a1</sup> European Prospective Investigation into Cancer and Nutrition, Department of Public Health and  
11 Primary Care, University of Cambridge, Strangeways Research Laboratory, Worts Causeway,  
12 Cambridge, UK

13 <sup>a2</sup> MRC Epidemiology Unit, Institute of Metabolic Science, Addenbrooke's Hospital, University of  
14 Cambridge, Cambridge, UK

15 <sup>a3</sup> EPIC, Department of Gerontology, Addenbrooke's Hospital, School of Clinical Medicine,  
16 University of Cambridge, Cambridge, UK

17  
18 Source of support: MRC Population Health Sciences Research Network (PHSRN), Cancer Research  
19 UK (C864/A8257) and the Medical Research Council (G0401527, G1000143)

20  
21 Running title: FETA: new processing tool for FFQs

22  
23 **Key words:** food frequency questionnaire, nutritional output, processing tool, EPIC-Norfolk

24  
25  
26 **Correspondence:**

27 <sup>c1</sup> Corresponding author: Ms A. Mulligan, telephone +44 1223 748683, fax +44 1223 748676, email  
28 [angela.mulligan@phpc.cam.ac.uk](mailto:angela.mulligan@phpc.cam.ac.uk)

29  
30 **Abbreviations:** FFQ, food frequency questionnaire; EPIC, European Prospective Investigation into  
31 Cancer and Nutrition; FETA, FFQ EPIC Tool for Analysis; CAFÉ, Compositional Analyses from  
32 Frequency Estimates

33  
34 Word count: 3 380

1  
2  
3  
4  
5  
6  
7  
8  
9  
10  
11  
12  
13  
14  
15  
16  
17  
18  
19  
20  
21  
22  
23  
24  
25  
26  
27  
28  
29  
30  
31  
32  
33  
34  
35  
36  
37  
38  
39  
40  
41  
42  
43  
44  
45  
46  
47  
48  
49  
50  
51  
52  
53  
54  
55  
56  
57  
58  
59  
60

## 35 ABSTRACT

### 36 Objectives

37 To describe the research methods for the development of a new open source, cross-platform tool  
38 which processes data from the European Prospective Investigation into Cancer and Nutrition  
39 Norfolk Food Frequency Questionnaire (EPIC-Norfolk FFQ). A further aim was to compare  
40 nutrient and food group values derived from the current tool (FETA; FFQ EPIC Tool for Analysis)  
41 with the previously validated but less accessible tool, CAFÉ (Compositional Analyses from  
42 Frequency Estimates). The effect of text matching on intake data was also investigated.

### 43 Design

44 Cross-sectional analysis of a prospective cohort study – EPIC-Norfolk.

### 45 Setting

46 East England population (city of Norwich and its surrounding small towns and rural areas).

### 47 Participants

48 Complete FFQ data from 11 250 men and 13 602 women (mean age 59 years; range 40 – 79 years).

### 49 Outcome measures

50 Nutrient and food group intakes derived from FETA and CAFÉ analyses of EPIC-Norfolk FFQ  
51 data.

### 52 Results

53 Nutrient outputs from FETA and CAFÉ were similar; mean (SD) energy intake from FETA was  
54 9222 kJ (2633) in men, 8113 kJ (2296) in women, compared to CAFÉ intakes of 9175 kJ (2630) in  
55 men, 8091 kJ (2298) in women. The majority of differences resulted in one or less quintile change  
56 (98.7%). Only mean daily fruit and vegetable food group intakes were higher in women than in men  
57 (278 v 212 g and 284 v 255 g respectively). Quintile changes were evident for all nutrients, with the  
58 exception of alcohol, when text matching was not executed; however, only the cereals food group  
59 was affected.

### 60 Conclusions

1  
2 61 FETA produces similar nutrient and food group values to the previously validated CAFÉ but has  
3  
4 62 the advantages of being open source, cross-platform and complete with a data-entry form directly  
5  
6 63 compatible with the software. The tool will facilitate research using the EPIC-Norfolk FFQ, and  
7  
8 64 can be customised for different study populations.  
9

#### 10 65 **Strengths and limitations of this study**

- 11  
12  
13 66 • FETA has been tested using a large study sample of food intake data.
- 14  
15 67 • No independent reference method used in the comparisons of FETA and CAFÉ nutrient
- 16  
17 68 intake data although the CAFÉ system has been previously validated.
- 18  
19  
20  
21 69

## 22 70 **INTRODUCTION**

23  
24  
25 71 Food Frequency Questionnaires (FFQs) are commonly used in epidemiological studies to assess the  
26  
27 72 dietary intake of large populations. Their popularity derives from ease of administration, ability to  
28  
29 73 assess dietary intake over a defined period of time, and low costs (1). The European Prospective  
30  
31 74 Investigation into Cancer and Nutrition (EPIC)-Norfolk FFQ is semi-quantitative and designed to  
32  
33 75 record the average intake of foods during the previous year. The principles involved in data  
34  
35 76 collection and processing of the EPIC-Norfolk FFQ and the development of the structure and  
36  
37 77 content of the CAFÉ program for calculating nutrient intakes have been published previously (2).  
38  
39 78 The EPIC-Norfolk FFQ has been extensively validated and has been widely used (3);(4);(5).  
40  
41 79 However, the programs used to process these FFQs, including CAFÉ, have not been easily  
42  
43 80 accessible to end-users.  
44  
45  
46

47 81 Our objectives were to develop a new, open source, cross-platform processing tool (FETA - FFQ  
48  
49 82 EPIC Tool for Analysis) based on and building upon the earlier system, CAFÉ (2). The aim of this  
50  
51 83 report was to describe the research methods of the development of FETA, and to compare nutrient  
52  
53 84 output from the FETA and CAFÉ programs. Food group intake data from FETA has also been  
54  
55 85 described as has the effect of free text matching on nutrient and food group intake data. Free text  
56  
57  
58  
59  
60

1  
2 86 matching refers to the assigning of an appropriate food code to hand-written text in the FFQ and  
3  
4 87 will be further described in the methods section.  
5  
6 88

## 89 **METHODS**

### 90 **EPIC-FFQ design**

91 The questionnaire consists of two parts. Part 1 consists of a food list of 130 lines; each line has a  
92 portion size attached to it: medium serving, standard unit or household measure. Study participants  
93 were requested to select an appropriate frequency of consumption for each line, from the nine  
94 frequency categories. As an example, Figure 1 illustrates the sections relating to bread, savoury  
95 biscuits and breakfast cereals. A pdf copy of the EPIC-Norfolk FFQ may be downloaded from  
96 <http://www.srl.cam.ac.uk/epic/epicffq/websitedocumentation.html>; information on how to complete  
97 and code the FFQ is also available here. The questionnaire lines are either individual foods,  
98 combinations of individual foods or food types. The FFQ food list is based on items from an FFQ  
99 widely used within the USA (6);(7), but modified to reflect differences in American versus UK  
100 brand names and some further food items were added.

101 Part 2 contains further questions, a number of which ask for more detailed information that link  
102 back to food lines in part one, as illustrated in Figure 2. Detailed information was requested for  
103 breakfast cereals and fats as these are nutritionally important foods in the UK diet.

### 104 **Data collection**

105 The EPIC-Norfolk FFQ was posted to 25 639 participants in the EPIC-Norfolk cohort study (8).  
106 The participants were aged 40-79 years and the questionnaire was completed between 1993 and  
107 1997. The study was approved by the Norfolk Local Research Ethics Committee, adhered to the  
108 Declaration of Helsinki and all participants gave written informed consent. The FFQ was returned  
109 at a health examination, where it was checked and completed, if required, by trained nursing staff.  
110 In total, 25 351 (99%) participants returned the completed questionnaire.

### 111 **Comparison of FETA and CAFÉ programs**

1  
2 112 FETA uses a csv (comma-separated values) input file. Part 1 is coded as numeric values and Part 2  
3  
4 113 is coded as numeric values and food codes, using the flow-charts and look-up lists provided  
5  
6 114 (<http://www.srl.cam.ac.uk/epic/epicffq/>). We have also created a Microsoft Access form-based  
7  
8 115 entry tool to facilitate FFQ data entry, based on the EPIC-Norfolk FFQ. The tool exports data in a  
9  
10 116 format directly compatible with FETA. The FETA software was written in C and C++ languages,  
11  
12 117 enabling faster processing times than SAS and the C/C++ software can also be used from the  
13  
14 118 command line. The step-based graphical wizard for running FETA was written in Perl. Whereas in  
15  
16 119 the CAFÉ program, an Oracle (Oracle Corporation, Redwood Shores, CA, USA) -based entry  
17  
18 120 system was created to enter Part 1 frequency data as numeric codes and Part 2 data as numeric  
19  
20 121 codes and free text. CAFÉ was written using SAS (SAS Software, Version 8 of the SAS System for  
21  
22 122 Unix, SAS Institute Inc., Cary, NC, USA) and links to tables in an Oracle relational database.

### 23 24 25 26 123 **Part 1- data entry**

27  
28 124 Data were manually entered into a spreadsheet as numeric codes, using '1' for 'never or less than  
29  
30 125 once a month', to '9' for '6+ times per day'. A code of '-9' was used to mark data where a  
31  
32 126 frequency was not recorded. Where two frequencies were provided for a line, this was coded as '-4'  
33  
34 127 and treated by both CAFÉ and FETA programs as missing data. However, in FETA, both  
35  
36 128 frequencies may now be entered, separated by a semi-colon, e.g. '2;3', and FETA will process the  
37  
38 129 first value.

### 39 40 41 42 130 **Part 2 – assigning of food codes to ticked boxes and free text**

43  
44 131 Part 2 contains hand-written text for milk, breakfast cereals and cooking fats (see Figure 2,  
45  
46 132 questions 3, 5, 6 and 7 respectively), which needs to be matched to the most appropriate food code  
47  
48 133 in order to obtain nutrient data; this process is known as free text matching. The data in part 2 were  
49  
50 134 coded using reference lists of food codes for varieties of milk, breakfast cereal and cooking fat.  
51  
52 135 Where there is no clear match, it is suggested that a researcher consults the ingredients and nutrient  
53  
54 136 information of the commercial item and compares this information with the nutrient profile of  
55  
56 137 similar items from the reference lists. These reference lists and figures relating to food codes that  
57  
58  
59  
60

1  
2 138 may be assigned to appropriate ticked boxes may be found at

3  
4 139 <http://www.srl.cam.ac.uk/epic/epicffq/websitedocumentation.html>

5  
6 140 Differences between FETA versus CAFÉ processing may also be found at

7  
8 141 <http://www.srl.cam.ac.uk/epic/epicffq/websitedocumentation.html>; these differences relate to

9  
10 142 breakfast cereals, frying and baking fats, the outcome of selecting the ‘None’ or ‘No’ box, and

11  
12 143 default milk, cereal, and fat codes.

#### 13 14 144 **Databases**

15  
16 145 Each line in Part 1 of the FFQ is mapped to up to six food codes. Decisions regarding which food

17  
18 146 codes to use were based on data from UK government surveys and other UK population data (7);

19  
20 147 (7,9,10). These decisions were based on data for individuals aged 40-74 years (7). Data for portion

21  
22 148 weights were sourced from UK population data and weighed records in 40-74 year old study

23  
24 149 participants (7,11).

25  
26 150 The EPIC-Norfolk FFQ uses 290 foods from the UK food composition database, McCance and

27  
28 151 Widdowson’s “The Composition of Foods” (5<sup>th</sup> edition) and its associated supplements (12–21). A

29  
30 152 number of new food items were added to the EPIC-Norfolk FFQ food list, which are used in both

31  
32 153 the FETA and CAFÉ programs. These include low calorie/diet fizzy drinks and crunchy oat cereal,

33  
34 154 as well as modified home-baked and fried foods (without their fat), to enable an individual’s fat

35  
36 155 type, as recorded in Part 2 of the FFQ, to be incorporated. However, the nutrient data of six of the

37  
38 156 nine new foods used in the CAFÉ program were modified in FETA. These foods include crunchy

39  
40 157 oat cereal, milk non-specific, low calorie/diet fizzy drinks, solid vegetable oil, Crisp ‘n Dry (solid

41  
42 158 fat), and oil and fat non-specific. Modifications to the nutrient data were made to ensure a more

43  
44 159 accurate nutrient profile and/or to better reflect the foods consumed, in the case of non-specific

45  
46 160 items, such as milk and oil/fat; these changes relate to nutrient/food data at the time of FFQ

47  
48 161 completion

#### 49 50 162 **Identification of outliers**

1  
2 163 Outliers were defined, as detailed previously (2). In brief, the ratio of energy intake (EI) to basal  
3  
4 164 metabolic rate (BMR) was calculated, where BMR was calculated using sex-specific Schofield  
5  
6 165 equations, which included age and body weight (22). Individuals in the top and bottom 0.5% of EI:  
7  
8 166 BMR ratio were identified and excluded, as were individuals with FFQs containing 10 or more  
9  
10 167 missing lines of data in Part 1 of the FFQ.

### 168 **Nutrient and food group outputs**

169 FETA produces four nutrient output formats and a sample of each of these can be viewed at  
170 <http://www.srl.cam.ac.uk/epic/epicffq/websitedocumentation.html>  
171 Output 1 contains average daily nutrient and food group intakes for an individual from all FFQ  
172 foods consumed, in wide format, suitable for import into a spreadsheet or statistical package. Intake  
173 data for 46 nutrients are provided as well as data for 14 basic food groups, however only a selection  
174 of these nutrients is shown in this report. Output 2 contains the same nutrient intake data as output  
175 1, but in long format, which is mostly suitable for programmers. Output 3 contains average daily  
176 nutrient and food group intakes (and amount of food consumed) for an individual for each FFQ line;  
177 this output file will be very large and is mostly suitable for programmers. The most detailed output  
178 (output 4) contains average daily nutrient and food group intakes, in addition to the amount of food  
179 consumed for an individual, for each food code, for each FFQ line (meal\_id). An online description  
180 of each meal\_id and nutrient code, including units of measurement, can be found in the data entry  
181 template. This output will also be very large and is mostly suitable for programmers.  
182 A log file is created along with each output file, which records the processing of the data and  
183 provides useful error information (see Appendix 1 for log file of output 1). In these files, both notes  
184 (general process information) and error messages are recorded, with a date and time stamp. The log  
185 files make it possible to calculate the number of missing frequencies based on Part 1 (main grid) of  
186 the FFQ in order to exclude individuals with 10 or more missing ticks. The log files also record  
187 situations where a food code does not have any nutrient data attached to it.

### 188 **Statistical analyses**

189 The data were analysed using STATA 10 (STATA Corp., Texas, USA). Intake data were described  
190 using mean, standard deviation (SD), median, minimum and maximum for both FETA and CAFÉ  
191 program outputs, stratified by sex. The nutrients selected for comparison are those described in the  
192 original CAFÉ paper. Where data on quintile changes are shown, cut-off points were calculated  
193 using CAFÉ nutrient data in order to compare quintile shift between FETA and CAFÉ output data.

194

## 195 **RESULTS**

196 We received FFQs from 25 351 participants (11 451 men and 13 900 women), with a mean age of  
197 59 years. From this set, 249 FFQs (90 men and 159 women) containing 10 or more missing lines of  
198 data in Part 1 of the FFQ were excluded, followed by a further exclusion of 250 FFQs (111 men and  
199 139 women) from the top and bottom 0.5% of EI:BMR. This resulted in the final analytical dataset  
200 of 24 852 participants (11 250 men and 13 602 women).

### 201 **Nutrient intake data from FETA and CAFÉ programs**

202 Table 1 shows the average daily intake data for a number of selected nutrients for 11 250 men. The  
203 data were similar for most nutrients across the two programs. The nutrients which had the highest  
204 percentage of quintile change ( $\geq 10\%$ ) were monounsaturated fat, saturated fat, iron, vitamin D &  
205 vitamin E. However, only 1.3% of the men changed more than one quintile, for two of these five  
206 nutrients. The nutrients which had the lowest percentage of quintile changes were alcohol, calcium  
207 and carotene, with less than 3% change (Table 1).

208 Table 2 shows average daily intake data for the selected nutrients for 13 602 women, from FETA  
209 and CAFÉ programs. There were similar quintile changes observed in women to those found in men  
210 for the selected nutrients; four of the nineteen nutrients had a quintile change of greater than 10%:  
211 polyunsaturated fat, saturated fat, iron and Vitamin E. However, the number of women who shifted  
212 more than one quintile was generally lower than the number observed in men. The nutrients which  
213 had the greatest percentage of women who changed more than one quintile were vitamins D and E,  
214 with 0.7 and 0.9% respectively.



1  
2 215 Detailed (output 4) nutrient intake data at the individual level obtained from the two programs were  
3  
4 216 compared for approximately half of the participants (n=12 500; data not shown). All differences (>  
5  
6 217 0.1%) found were investigated and explanations for these differences are considered in the  
7  
8 218 discussion.  
9  
10  
11  
12  
13  
14  
15  
16  
17  
18  
19  
20  
21  
22  
23  
24  
25  
26  
27  
28  
29  
30  
31  
32  
33  
34  
35  
36  
37  
38  
39  
40  
41  
42  
43  
44  
45  
46  
47  
48  
49  
50  
51  
52  
53  
54  
55  
56  
57  
58  
59  
60

For peer review only

Table 1 Average daily nutrient intakes for men (N=11 250) participating in the EPIC-Norfolk study, from the FETA and CAFÉ programs, after the exclusion of outliers, with numbers and percentages of men who moved quintile

| Nutrient                | FETA program |      |      |          |          | CAFÉ program |      |      |          |          | Quintile        |      |            |     |
|-------------------------|--------------|------|------|----------|----------|--------------|------|------|----------|----------|-----------------|------|------------|-----|
|                         | Median       | Mean | SD   | Mini mum | Maxi mum | Median       | Mean | SD   | Mini mum | Maxi mum | Quintile change |      | change > 1 |     |
|                         |              |      |      |          |          |              |      |      |          |          | N               | %    | N          | %   |
| Energy (kcal)           | 2126         | 2190 | 627  | 748      | 5085     | 2115         | 2179 | 626  | 748      | 5101     | 892             | 7.9  | 0          | 0.0 |
| Energy (kJ)             | 8947         | 9222 | 2633 | 3124     | 21394    | 8900         | 9175 | 2630 | 3124     | 21440    | 891             | 7.9  | 0          | 0.0 |
| Protein (g)             | 83.4         | 85.2 | 22.0 | 23.3     | 319.8    | 83.2         | 84.9 | 22.0 | 23.3     | 318.4    | 464             | 4.1  | 0          | 0.0 |
| Alcohol (g)             | 6.7          | 12.3 | 16.1 | 0.0      | 134.2    | 6.7          | 12.3 | 16.1 | 0.0      | 134.2    | 0               | 0.0  | 0          | 0.0 |
| Carbohydrate (g)        | 261          | 271  | 87   | 48       | 737      | 259          | 269  | 87   | 48       | 729      | 726             | 6.5  | 0          | 0.0 |
| Starch (g)              | 123          | 128  | 45   | 10       | 504      | 122          | 127  | 45   | 10       | 501      | 813             | 7.2  | 1          | 0.0 |
| Englyst fibre (g)       | 17.5         | 18.2 | 6.4  | 1.3      | 89.9     | 17.3         | 18.0 | 6.4  | 1.3      | 89.9     | 743             | 6.6  | 1          | 0.0 |
| Fat (g)                 | 78.9         | 83.2 | 31.3 | 13.4     | 260.6    | 78.7         | 83.0 | 31.3 | 13.4     | 260.6    | 1049            | 9.3  | 8          | 0.1 |
| Monounsaturated fat (g) | 27.0         | 28.8 | 11.6 | 4.8      | 101.2    | 26.8         | 28.5 | 11.5 | 4.8      | 105.1    | 1264            | 11.2 | 21         | 0.2 |
| Polyunsaturated fat (g) | 13.5         | 15.0 | 6.9  | 1.6      | 66.6     | 13.7         | 15.3 | 7.1  | 1.6      | 69.5     | 1074            | 9.5  | 24         | 0.2 |
| Saturated fat (g)       | 30.1         | 32.3 | 13.6 | 3.0      | 110.6    | 29.8         | 31.9 | 13.5 | 3.0      | 106.7    | 1288            | 11.5 | 20         | 0.2 |
| Calcium (mg)            | 1021         | 1039 | 301  | 189      | 2848     | 1018         | 1037 | 300  | 189      | 2849     | 296             | 2.6  | 1          | 0.0 |
| Iron (mg)               | 12.1         | 12.4 | 3.6  | 2.6      | 38.7     | 11.9         | 12.3 | 3.5  | 2.5      | 38.5     | 1149            | 10.2 | 7          | 0.1 |
| Potassium (mg)          | 3814         | 3881 | 911  | 1305     | 11718    | 3802         | 3869 | 909  | 1284     | 11718    | 411             | 3.7  | 0          | 0.0 |

1  
2  
3  
4  
5  
6  
7  
8  
9  
10  
11  
12  
13  
14  
15  
16  
17  
18  
19  
20  
21  
22  
23  
24  
25  
26  
27  
28  
29  
30  
31  
32  
33  
34  
35  
36  
37  
38  
39  
40  
41  
42  
43  
44  
45  
46  
47  
48  
49

|                 |      |      |      |      |       |      |      |      |      |       |      |      |     |     |
|-----------------|------|------|------|------|-------|------|------|------|------|-------|------|------|-----|-----|
| Carotene (mcg)  | 3188 | 3321 | 1573 | 147  | 25720 | 3178 | 3309 | 1571 | 147  | 25720 | 156  | 1.4  | 0   | 0.0 |
| Folate (mcg)    | 320  | 331  | 97   | 77   | 1547  | 316  | 327  | 96   | 77   | 1547  | 836  | 7.4  | 3   | 0.0 |
| Vitamin C (mg)  | 103  | 111  | 52   | 10   | 669   | 105  | 113  | 52   | 10   | 669   | 411  | 3.7  | 14  | 0.1 |
| Vitamin D (mcg) | 3.16 | 3.65 | 2.08 | 0.03 | 27.08 | 3.13 | 3.62 | 2.06 | 0.03 | 27.12 | 1161 | 10.3 | 145 | 1.3 |
| Vitamin E (mg)  | 13.2 | 14.9 | 7.2  | 2.1  | 62.3  | 12.9 | 14.4 | 6.8  | 2.1  | 62.0  | 1545 | 13.7 | 146 | 1.3 |

For peer review only

Table 2 Average daily nutrient intakes for women (N=13 602) participating in the EPIC-Norfolk study, from the FETA and CAFÉ programs, after the exclusion of outliers, with numbers and percentages of women who moved quintile

| Nutrient                | FETA program  |      |      |          |          | CAFÉ program |      |      |          |          | Quintile change |      | Quintile change > 1 |     |
|-------------------------|---------------|------|------|----------|----------|--------------|------|------|----------|----------|-----------------|------|---------------------|-----|
|                         | Median        | Mean | SD   | Mini mum | Maxi mum | Median       | Mean | SD   | Mini mum | Maxi mum | N               | %    | N                   | %   |
|                         | Energy (kcal) | 1859 | 1925 | 546      | 538      | 4733         | 1853 | 1920 | 547      | 518      | 4643            | 1030 | 7.6                 | 0   |
| Energy (kJ)             | 7833          | 8113 | 2296 | 2261     | 19910    | 7811         | 8091 | 2298 | 2179     | 19537    | 1018            | 7.5  | 0                   | 0.0 |
| Protein (g)             | 79.8          | 81.5 | 21.1 | 23.0     | 246.0    | 79.6         | 81.3 | 21.0 | 22.7     | 246.1    | 495             | 3.6  | 1                   | 0.0 |
| Alcohol (g)             | 2.0           | 5.6  | 8.4  | 0.0      | 99.5     | 2.0          | 5.6  | 8.4  | 0.0      | 99.5     | 0               | 0.0  | 0                   | 0.0 |
| Carbohydrate (g)        | 237           | 247  | 77   | 59       | 766      | 235          | 245  | 77   | 58       | 766      | 974             | 7.2  | 1                   | 0.0 |
| Starch (g)              | 107           | 112  | 39   | 13       | 405      | 106          | 111  | 39   | 13       | 406      | 1142            | 8.4  | 1                   | 0.0 |
| Englyst fibre (g)       | 18.2          | 19.0 | 6.8  | 2.3      | 118.5    | 18.0         | 18.8 | 6.7  | 2.4      | 118.6    | 850             | 6.2  | 1                   | 0.0 |
| Fat (g)                 | 67.0          | 70.8 | 27.1 | 11.7     | 221.0    | 67.2         | 71.2 | 27.3 | 11.6     | 217.2    | 1194            | 8.8  | 4                   | 0.0 |
| Monounsaturated fat (g) | 22.5          | 24.1 | 9.9  | 3.8      | 100.3    | 22.5         | 24.1 | 9.9  | 3.5      | 100.6    | 1338            | 9.8  | 7                   | 0.1 |
| Polyunsaturated fat (g) | 12.2          | 13.5 | 6.2  | 2.0      | 53.6     | 12.5         | 13.8 | 6.3  | 2.0      | 53.6     | 1434            | 10.5 | 23                  | 0.2 |
| Saturated fat (g)       | 25.0          | 27.0 | 11.7 | 3.6      | 102.3    | 25.0         | 26.9 | 11.7 | 3.7      | 99.3     | 1443            | 10.6 | 9                   | 0.1 |
| Calcium (mg)            | 971           | 992  | 290  | 128      | 3159     | 969          | 990  | 290  | 127      | 3159     | 390             | 2.9  | 4                   | 0.0 |
| Iron (mg)               | 11.5          | 11.8 | 3.6  | 1.7      | 66.1     | 11.3         | 11.7 | 3.5  | 1.8      | 65.7     | 1496            | 11.0 | 12                  | 0.1 |
| Potassium (mg)          | 3781          | 3861 | 942  | 1150     | 16568    | 3769         | 3848 | 939  | 1147     | 16587    | 486             | 3.6  | 1                   | 0.0 |
| Carotene (mcg)          | 3477          | 3719 | 1917 | 67       | 61971    | 3469         | 3712 | 1917 | 64       | 61983    | 122             | 0.9  | 0                   | 0.0 |

1  
2  
3  
4  
5  
6  
7  
8  
9  
10  
11  
12  
13  
14  
15  
16  
17  
18  
19  
20  
21  
22  
23  
24  
25  
26  
27  
28  
29  
30  
31  
32  
33  
34  
35  
36  
37  
38  
39  
40  
41  
42  
43  
44  
45  
46  
47  
48  
49

|                 |      |      |      |      |       |      |      |      |      |       |      |      |     |     |
|-----------------|------|------|------|------|-------|------|------|------|------|-------|------|------|-----|-----|
| Folate (mcg)    | 322  | 332  | 103  | 65   | 2039  | 317  | 328  | 101  | 65   | 2024  | 1025 | 7.5  | 5   | 0.0 |
| Vitamin C (mg)  | 123  | 133  | 64   | 4    | 1006  | 125  | 135  | 64   | 4    | 1006  | 746  | 5.5  | 35  | 0.3 |
| Vitamin D (mcg) | 3.01 | 3.46 | 1.90 | 0.00 | 17.83 | 3.02 | 3.45 | 1.90 | 0.00 | 17.75 | 1119 | 8.2  | 90  | 0.7 |
| Vitamin E (mg)  | 12.4 | 13.8 | 6.2  | 1.5  | 52.4  | 12.2 | 13.5 | 6.0  | 1.6  | 49.8  | 1863 | 13.7 | 123 | 0.9 |

For peer review only

1  
2 223 **Food group intake data from FETA**  
3

4 224 Average daily intakes for both men and women of the fourteen food groups readily available from  
5  
6 225 FETA are shown in Table 3. Mean daily intakes of six of the food groups were higher in men than  
7  
8 226 in women: alcohol, cereals, fats, meat, potatoes and sugars. However, women had higher intakes of  
9  
10 227 fruit (278g v 212g) and vegetables (284g v 255g). Mean daily intakes of eggs, fish, milk, non-  
11  
12 228 alcoholic beverages, nuts and seeds, and soups and sauces were similar in both men and women.

13  
14  
15 229 **The effect of text matching in FETA**  
16

17 230 Tables 4 and 5 illustrate the variation in nutrient and food group intake data obtained in a random  
18  
19 231 subset of 1 159 men and 1 340 women, respectively, depending on whether text matching of milks,  
20  
21 232 breakfast cereals and baking and frying fats was applied. In general, mean nutrient intakes were  
22  
23 233 higher when text matching was carried out. In men, (Table 4), quintile changes (>15%) were most  
24  
25 234 evident in the following nutrients: Englyst fibre, polyunsaturated fat, folate, vitamin D and vitamin  
26  
27 235 E. The food group “cereals and cereal products” was the only one of the fourteen groups where  
28  
29 236 there was a difference, with 31 men moving 1 quintile.  
30  
31  
32 237 In women, (Table 5), quintile changes (>15%) were also most evident in the same five nutrients.  
33  
34 238 However, almost 21% of women also changed quintile for iron. Once again, the “cereals and cereal  
35  
36 239 products” food group was the only food group where there was any difference, with 40 women  
37  
38  
39 240 moving 1 quintile.  
40  
41  
42  
43  
44  
45  
46  
47  
48  
49  
50  
51  
52  
53  
54  
55  
56  
57  
58  
59  
60

1  
2  
3  
4  
5  
6  
7  
8  
9  
10  
11  
12  
13  
14  
15  
16  
17  
18  
19  
20  
21  
22  
23  
24  
25  
26  
27  
28  
29  
30  
31  
32  
33  
34  
35  
36  
37  
38  
39  
40  
41  
42  
43  
44  
45  
46  
47  
48  
49

Table 3 Average daily food group intakes for men (N=11 250) and women (N=13 602) participating in the EPIC-Norfolk study, from the FETA program

| Food group                    | Men    |      |     |          |          | Women  |      |     |          |          |
|-------------------------------|--------|------|-----|----------|----------|--------|------|-----|----------|----------|
|                               | Median | Mean | SD  | Mini mum | Maxi mum | Median | Mean | SD  | Mini mum | Maxi mum |
| Alcoholic beverages (g)       | 101    | 204  | 315 | 0        | 2483     | 23     | 64   | 109 | 0        | 1728     |
| Cereals & cereal products (g) | 242    | 260  | 127 | 0        | 1456     | 215    | 231  | 110 | 0        | 1172     |
| Eggs & egg dishes (g)         | 18     | 17   | 15  | 0        | 225      | 14     | 16   | 14  | 0        | 236      |
| Fats & oils (g)               | 31     | 36   | 22  | 0        | 207      | 27     | 30   | 20  | 0        | 218      |
| Fish & fish products (g)      | 32     | 37   | 26  | 0        | 362      | 32     | 38   | 26  | 0        | 309      |
| Fruit (g)                     | 179    | 212  | 164 | 0        | 2654     | 238    | 278  | 201 | 0        | 3742     |
| Meat & meat products (g)      | 99     | 106  | 54  | 0        | 856      | 91     | 94   | 48  | 0        | 606      |
| Milk & milk products (g)      | 407    | 420  | 182 | 0        | 1303     | 386    | 410  | 175 | 0        | 1560     |
| Non-alcoholic beverages (g)   | 1157   | 1177 | 396 | 0        | 3707     | 1150   | 1165 | 403 | 0        | 4501     |
| Nuts & seeds (g)              | 0      | 3    | 9   | 0        | 228      | 0      | 3    | 9   | 0        | 188      |
| Potatoes (g)                  | 125    | 122  | 69  | 0        | 1007     | 116    | 112  | 64  | 0        | 1506     |
| Soups & sauces (g)            | 43     | 58   | 54  | 0        | 1004     | 43     | 57   | 53  | 0        | 1376     |
| Sugars (g)                    | 53     | 64   | 50  | 0        | 572      | 37     | 48   | 42  | 0        | 541      |
| Vegetables (g)                | 236    | 255  | 123 | 0        | 2398     | 262    | 284  | 143 | 0        | 3539     |

Table 4 Comparison of average daily nutrient and food group intakes for men (N=1 159) participating in the EPIC-Norfolk study, from the FETA program, with and without the application of text matching

| Nutrient/Food group     | FETA program,<br>with text matching |      |      |             |             | FETA program, without text<br>matching |      |      |             |             | Quintile        |      |            |     |
|-------------------------|-------------------------------------|------|------|-------------|-------------|----------------------------------------|------|------|-------------|-------------|-----------------|------|------------|-----|
|                         | Median                              | Mean | SD   | Mini<br>mum | Maxi<br>mum | Median                                 | Mean | SD   | Mini<br>mum | Maxi<br>mum | Quintile change |      | change > 1 |     |
|                         |                                     |      |      |             |             |                                        |      |      |             |             | N               | %    | N          | %   |
| Energy (kcal)           | 2095                                | 2176 | 678  | 658         | 7766        | 2091                                   | 2170 | 678  | 658         | 7787        | 28              | 2.4  | 0          | 0.0 |
| Energy (kJ)             | 8822                                | 9161 | 2848 | 2780        | 32555       | 8804                                   | 9138 | 2850 | 2780        | 32647       | 26              | 2.2  | 0          | 0.0 |
| Protein (g)             | 82.8                                | 85.0 | 22.8 | 22.1        | 272.3       | 82.5                                   | 84.7 | 22.8 | 22.1        | 272.3       | 34              | 2.9  | 0          | 0.0 |
| Alcohol (g)             | 7.2                                 | 12.3 | 16.1 | 0.0         | 112.9       | 7.2                                    | 12.3 | 16.1 | 0.0         | 112.9       | 0               | 0.0  | 0          | 0.0 |
| Carbohydrate (g)        | 261                                 | 270  | 93   | 63          | 1006        | 259                                    | 269  | 93   | 63          | 1003        | 48              | 4.1  | 0          | 0.0 |
| Starch (g)              | 120                                 | 127  | 49   | 7           | 643         | 121                                    | 126  | 48   | 7           | 636         | 65              | 5.6  | 0          | 0.0 |
| Englyst fibre (g)       | 17.5                                | 18.3 | 6.6  | 3.6         | 71.8        | 17.3                                   | 17.9 | 6.3  | 3.6         | 64.5        | 198             | 17.1 | 10         | 0.9 |
| Fat (g)                 | 77.8                                | 82.1 | 33.1 | 12.8        | 387.8       | 77.3                                   | 82.1 | 33.1 | 12.8        | 389.3       | 32              | 2.8  | 0          | 0.0 |
| Monounsaturated fat (g) | 26.5                                | 28.2 | 12.2 | 3.5         | 131.1       | 26.7                                   | 28.7 | 12.5 | 3.7         | 138.7       | 88              | 7.6  | 0          | 0.0 |
| Polyunsaturated fat (g) | 13.5                                | 14.9 | 7.3  | 3.0         | 67.0        | 12.7                                   | 14.1 | 6.8  | 3.0         | 60.7        | 179             | 15.4 | 17         | 1.5 |
| Saturated fat (g)       | 30.1                                | 31.8 | 14.1 | 3.3         | 160.0       | 30.3                                   | 32.2 | 14.3 | 3.3         | 160.3       | 72              | 6.2  | 1          | 0.1 |
| Calcium (mg)            | 1015                                | 1044 | 312  | 242         | 2848        | 1012                                   | 1044 | 313  | 242         | 2861        | 42              | 3.6  | 0          | 0.0 |
| Iron (mg)               | 11.9                                | 12.5 | 3.8  | 2.6         | 37.9        | 11.7                                   | 12.0 | 3.5  | 2.6         | 38.1        | 173             | 14.9 | 16         | 1.4 |
| Potassium (mg)          | 3824                                | 3889 | 957  | 1353        | 12675       | 3812                                   | 3873 | 951  | 1353        | 12551       | 52              | 4.5  | 0          | 0.0 |



1  
2  
3  
4  
5  
6  
7  
8  
9  
10  
11  
12  
13  
14  
15  
16  
17  
18  
19  
20  
21  
22  
23  
24  
25  
26  
27  
28  
29  
30  
31  
32  
33  
34  
35  
36  
37  
38  
39  
40  
41  
42  
43  
44  
45  
46  
47  
48  
49

|                               |      |      |      |      |       |      |      |      |      |       |     |      |    |     |
|-------------------------------|------|------|------|------|-------|------|------|------|------|-------|-----|------|----|-----|
| Carotene (mcg)                | 3150 | 3348 | 1671 | 507  | 18295 | 3162 | 3353 | 1672 | 507  | 18338 | 6   | 0.5  | 0  | 0.0 |
| Folate (mcg)                  | 325  | 333  | 103  | 94   | 1222  | 316  | 326  | 101  | 94   | 1262  | 226 | 19.5 | 2  | 0.2 |
| Vitamin C (mg)                | 105  | 113  | 55   | 17   | 619   | 104  | 112  | 55   | 17   | 619   | 22  | 1.9  | 0  | 0.0 |
| Vitamin D (mcg)               | 3.08 | 3.64 | 2.17 | 0.03 | 16.40 | 3.06 | 3.64 | 2.19 | 0.03 | 20.52 | 227 | 19.6 | 8  | 0.7 |
| Vitamin E (mg)                | 13.3 | 15.0 | 7.6  | 2.7  | 74.7  | 13.0 | 14.5 | 7.1  | 2.7  | 71.2  | 238 | 20.5 | 30 | 2.6 |
| Alcoholic beverages (g)       | 104  | 201  | 301  | 0    | 1866  | 104  | 201  | 301  | 0    | 1866  | 0   | 0.0  | 0  | 0.0 |
| Cereals & cereal products (g) | 240  | 257  | 131  | 0    | 1378  | 238  | 255  | 130  | 0    | 1378  | 31  | 2.7  | 0  | 0.0 |
| Eggs & egg dishes (g)         | 18   | 17   | 17   | 0    | 225   | 18   | 17   | 17   | 0    | 225   | 0   | 0.0  | 0  | 0.0 |
| Fats & oils (g)               | 31   | 36   | 25   | 0    | 313   | 31   | 36   | 25   | 0    | 313   | 0   | 0.0  | 0  | 0.0 |
| Fish & fish products (g)      | 32   | 37   | 25   | 0    | 153   | 32   | 37   | 25   | 0    | 153   | 0   | 0.0  | 0  | 0.0 |
| Fruit (g)                     | 184  | 216  | 158  | 0    | 1037  | 184  | 216  | 158  | 0    | 1037  | 0   | 0.0  | 0  | 0.0 |
| Meat & meat products (g)      | 98   | 104  | 52   | 0    | 690   | 98   | 104  | 52   | 0    | 690   | 0   | 0.0  | 0  | 0.0 |
| Milk & milk products (g)      | 414  | 428  | 187  | 0    | 1302  | 414  | 428  | 187  | 0    | 1302  | 0   | 0.0  | 0  | 0.0 |
| Non-alcoholic beverages (g)   | 1159 | 1191 | 397  | 22   | 3677  | 1159 | 1191 | 397  | 22   | 3677  | 0   | 0.0  | 0  | 0.0 |
| Nuts & seeds (g)              | 0    | 3    | 8    | 0    | 135   | 0    | 3    | 8    | 0    | 135   | 0   | 0.0  | 0  | 0.0 |
| Potatoes (g)                  | 125  | 121  | 78   | 0    | 1518  | 125  | 121  | 78   | 0    | 1518  | 0   | 0.0  | 0  | 0.0 |
| Soups & sauces (g)            | 43   | 56   | 51   | 0    | 556   | 43   | 56   | 51   | 0    | 556   | 0   | 0.0  | 0  | 0.0 |
| Sugars (g)                    | 51   | 63   | 50   | 0    | 358   | 51   | 63   | 50   | 0    | 358   | 0   | 0.0  | 0  | 0.0 |
| Vegetables (g)                | 238  | 256  | 128  | 15   | 1047  | 238  | 256  | 128  | 15   | 1047  | 0   | 0.0  | 0  | 0.0 |

Table 5 Comparison of average daily nutrient and food group intakes for women (N=1 340) participating in the EPIC-Norfolk study, from the FETA program, with and without the application of text matching

| Nutrient/Food group     | FETA program, with text matching |      |      |          |          | FETA program, without text matching |      |      |          |          | Quintile change > 1 |      |            |     |
|-------------------------|----------------------------------|------|------|----------|----------|-------------------------------------|------|------|----------|----------|---------------------|------|------------|-----|
|                         | Median                           | Mean | SD   | Mini mum | Maxi mum | Median                              | Mean | SD   | Mini mum | Maxi mum | Quintile change     |      | change > 1 |     |
|                         |                                  |      |      |          |          |                                     |      |      |          |          | N                   | %    | N          | %   |
| Energy (kcal)           | 1886                             | 1946 | 607  | 608      | 8103     | 1880                                | 1941 | 605  | 608      | 8134     | 50                  | 3.7  | 0          | 0.0 |
| Energy (kJ)             | 7938                             | 8202 | 2554 | 2552     | 34410    | 7909                                | 8177 | 2547 | 2552     | 34541    | 47                  | 3.5  | 0          | 0.0 |
| Protein (g)             | 80.3                             | 82.5 | 22.2 | 26.8     | 277.0    | 79.9                                | 82.1 | 22.1 | 26.8     | 276.6    | 43                  | 3.2  | 0          | 0.0 |
| Alcohol (g)             | 2.0                              | 5.4  | 8.1  | 0.0      | 65.3     | 2.0                                 | 5.4  | 8.1  | 0.0      | 65.3     | 0                   | 0.0  | 0          | 0.0 |
| Carbohydrate (g)        | 238                              | 250  | 90   | 67       | 1596     | 237                                 | 249  | 90   | 67       | 1603     | 58                  | 4.3  | 0          | 0.0 |
| Starch (g)              | 109                              | 114  | 52   | 25       | 1288     | 108                                 | 114  | 52   | 25       | 1301     | 99                  | 7.4  | 0          | 0.0 |
| Englyst fibre (g)       | 18.6                             | 19.3 | 7.4  | 4.1      | 103.7    | 17.8                                | 18.7 | 7.1  | 3.3      | 97.2     | 247                 | 18.4 | 13         | 1.0 |
| Fat (g)                 | 67.6                             | 71.4 | 28.5 | 17.2     | 259.4    | 67.5                                | 71.3 | 28.4 | 17.2     | 259.7    | 45                  | 3.4  | 0          | 0.0 |
| Monounsaturated fat (g) | 22.7                             | 24.4 | 10.6 | 4.8      | 104.2    | 23.1                                | 24.6 | 10.6 | 4.8      | 103.8    | 133                 | 9.9  | 0          | 0.0 |
| Polyunsaturated fat (g) | 12.2                             | 13.6 | 6.2  | 2.6      | 42.5     | 11.5                                | 12.9 | 5.9  | 2.5      | 39.4     | 224                 | 16.7 | 11         | 0.8 |
| Saturated fat (g)       | 25.2                             | 27.2 | 12.4 | 5.1      | 109.6    | 25.5                                | 27.5 | 12.4 | 5.1      | 109.6    | 74                  | 5.5  | 2          | 0.1 |
| Calcium (mg)            | 978                              | 995  | 298  | 242      | 2528     | 976                                 | 992  | 297  | 242      | 2534     | 46                  | 3.4  | 1          | 0.1 |
| Iron (mg)               | 11.7                             | 11.9 | 3.9  | 3.1      | 67.8     | 11.1                                | 11.4 | 3.5  | 3.1      | 55.3     | 280                 | 20.9 | 44         | 3.3 |
| Potassium (mg)          | 3788                             | 3874 | 994  | 1284     | 12702    | 3744                                | 3848 | 987  | 1280     | 12526    | 68                  | 5.1  | 0          | 0.0 |

1  
2  
3  
4  
5  
6  
7  
8  
9  
10  
11  
12  
13  
14  
15  
16  
17  
18  
19  
20  
21  
22  
23  
24  
25  
26  
27  
28  
29  
30  
31  
32  
33  
34  
35  
36  
37  
38  
39  
40  
41  
42  
43  
44  
45  
46  
47  
48  
49

|                               |      |      |      |      |       |      |      |      |      |       |     |      |    |     |
|-------------------------------|------|------|------|------|-------|------|------|------|------|-------|-----|------|----|-----|
| Carotene (mcg)                | 3489 | 3731 | 1705 | 178  | 13796 | 3500 | 3736 | 1707 | 175  | 13796 | 11  | 0.8  | 0  | 0.0 |
| Folate (mcg)                  | 326  | 337  | 107  | 102  | 1311  | 318  | 329  | 105  | 97   | 1276  | 291 | 21.7 | 1  | 0.1 |
| Vitamin C (mg)                | 124  | 133  | 63   | 4    | 809   | 122  | 132  | 62   | 4    | 809   | 34  | 2.5  | 0  | 0.0 |
| Vitamin D (mcg)               | 3.07 | 3.49 | 1.89 | 0.22 | 12.06 | 3.02 | 3.46 | 1.89 | 0.29 | 12.46 | 248 | 18.5 | 9  | 0.7 |
| Vitamin E (mg)                | 12.5 | 13.8 | 6.3  | 2.7  | 52.4  | 12.1 | 13.3 | 5.9  | 3.3  | 43.6  | 270 | 20.2 | 21 | 1.6 |
| Alcoholic beverages (g)       | 21   | 61   | 104  | 0    | 1350  | 21   | 61   | 104  | 0    | 1350  | 0   | 0.0  | 0  | 0.0 |
| Cereals & cereal products (g) | 214  | 236  | 174  | 9    | 4948  | 212  | 234  | 174  | 9    | 4948  | 40  | 3.0  | 0  | 0.0 |
| Eggs & egg dishes (g)         | 14   | 16   | 14   | 0    | 136   | 14   | 16   | 14   | 0    | 136   | 0   | 0.0  | 0  | 0.0 |
| Fats & oils (g)               | 27   | 30   | 19   | 0    | 133   | 27   | 30   | 19   | 0    | 133   | 0   | 0.0  | 0  | 0.0 |
| Fish & fish products (g)      | 32   | 39   | 26   | 0    | 187   | 32   | 39   | 26   | 0    | 187   | 0   | 0.0  | 0  | 0.0 |
| Fruit (g)                     | 238  | 277  | 199  | 0    | 2830  | 238  | 277  | 199  | 0    | 2830  | 0   | 0.0  | 0  | 0.0 |
| Meat & meat products (g)      | 90   | 95   | 49   | 0    | 392   | 90   | 95   | 49   | 0    | 392   | 0   | 0.0  | 0  | 0.0 |
| Milk & milk products (g)      | 381  | 410  | 174  | 0    | 959   | 381  | 410  | 174  | 0    | 959   | 0   | 0.0  | 0  | 0.0 |
| Non-alcoholic beverages (g)   | 1148 | 1153 | 404  | 8    | 3215  | 1148 | 1153 | 404  | 8    | 3215  | 0   | 0.0  | 0  | 0.0 |
| Nuts & seeds (g)              | 0    | 3    | 11   | 0    | 180   | 0    | 3    | 11   | 0    | 180   | 0   | 0.0  | 0  | 0.0 |
| Potatoes (g)                  | 116  | 113  | 61   | 0    | 785   | 116  | 113  | 61   | 0    | 785   | 0   | 0.0  | 0  | 0.0 |
| Soups & sauces (g)            | 45   | 57   | 53   | 0    | 900   | 45   | 57   | 53   | 0    | 900   | 0   | 0.0  | 0  | 0.0 |
| Sugars (g)                    | 38   | 50   | 46   | 0    | 540   | 38   | 50   | 46   | 0    | 540   | 0   | 0.0  | 0  | 0.0 |
| Vegetables (g)                | 265  | 288  | 140  | 2    | 1387  | 265  | 288  | 140  | 2    | 1387  | 0   | 0.0  | 0  | 0.0 |

1  
2  
3  
4  
5  
6  
7  
8  
9  
10  
11  
12  
13  
14  
15  
16  
17  
18  
19  
20  
21  
22  
23  
24  
25  
26  
27  
28  
29  
30  
31  
32  
33  
34  
35  
36  
37  
38  
39  
40  
41  
42  
43  
44  
45  
46  
47  
48  
49  
50  
51  
52  
53  
54  
55  
56  
57  
58  
60

249 **DISCUSSION**

250 FETA provides a new, freely available, standalone tool that can produce nutrient and food group  
251 intake values from data collected using the EPIC-Norfolk FFQ. It makes the EPIC-Norfolk FFQ  
252 readily accessible to end-users and enables them to process and analyse nutritional data. The data  
253 can either be entered into a spreadsheet, using the instructions provided, or by using the  
254 specifically developed Microsoft Access form-based entry tool. The Access entry tool allows  
255 easier entry without requiring knowledge of specific food codes. The software for FETA for  
256 Windows and Linux can be downloaded from the website, as can the Microsoft Access data entry  
257 utility (<http://www.srl.cam.ac.uk/epic/epicffq/>). Users are encouraged to register with EPIC-  
258 Norfolk, as this enables them to request assistance and support. The various types of output (with  
259 four levels of information) available should prove beneficial to researchers, especially those  
260 requiring more detailed information. There is an on-going need for information on the intake of  
261 food groups. While the data from either output 3 or 4 could be used to generate more detailed  
262 food group data, we have treated food groups as another type of nutrient – a pseudo-nutrient. The  
263 FETA input/look-up files can be easily modified to create new groups, greatly adding to the  
264 flexibility of the system for analysing food group consumption, while requiring no spreadsheet or  
265 programming skills on the part of the analyst. A helpful feature of FETA is the log file which  
266 documents errors relating to FFQ data and/or default food codes assigned.

267 FETA was designed and based on the extensively validated EPIC-Norfolk FFQ, originally  
268 developed in 1988, to assess the nutrient and food group intake of 40-79 year olds, who  
269 completed the FFQ between 1993 and 1997. The food list and look-up lists of milks, breakfast  
270 cereals and fats reflect this time period and the study population, as do the default milk, cereal,  
271 baking fat and frying fat codes assigned. However, the program was created in such a way that it  
272 can be customised for different study populations, easily enabled by the separation of the  
273 processing algorithm in the FETA program implementation from the data model text files. It is  
274 possible to delete/add foods and/or FFQ lines, and modify portion sizes as desired for a study.

1  
2 275 Nutrient data may also be easily modified or added. It is also possible for FETA to be used with  
3  
4 276 other questionnaires containing a different set of line items or different numbers of frequencies.  
5  
6 277 Comparisons were carried out for a number of selected nutrients obtained from FETA and the  
7  
8 278 previously validated CAFÉ program. These showed that the nutrient output from both programs  
9  
10 279 were generally similar. All differences (>0.1%) found from the comparison of detailed  
11  
12 280 food/nutrient data at the individual level for 12 500 participants from FETA and the CAFÉ  
13  
14 281 program can be explained by one or more of the following reasons: up to four cereal foods  
15  
16 282 assigned by FETA, as compared to a maximum of two cereal foods assigned by CAFÉ;  
17  
18 283 differences in default baking and frying fat codes assigned; correction for muesli portion size in  
19  
20 284 cereal data; exclusion of porridge from cereal data (free text); default codes assigned for milk,  
21  
22 285 cereals or fats to participants using FETA (where no food codes were assigned by CAFÉ  
23  
24 286 program); rounding error (only where percentage absolute differences were between 0.1 to 1%)  
25  
26 287 and changes made to the nutrient data of six of the nine new foods as well as to the default code  
27  
28 288 for milk. A section entitled 'What are the differences between FETA versus CAFÉ processing?'  
29  
30 289 found at <http://www.srl.cam.ac.uk/epic/epicffq/FAQs.html> further explains the aforementioned  
31  
32 290 differences.  
33  
34  
35  
36  
37 291 Although nutrient intakes as calculated by FETA and CAFÉ were similar, some relatively small  
38  
39 292 differences existed, but these and the quintile shift of men and women can be explained. In  
40  
41 293 FETA, a number of changes were made to the processing of breakfast cereals, affecting  
42  
43 294 carbohydrate, starch, Englyst fibre, iron and folate estimates. The vitamin C content per 100g of  
44  
45 295 low calorie/diet fizzy drinks was changed from 5 to 0 mg and the vitamin E content of crunchy  
46  
47 296 oat cereal and oil and fat non-specific was increased. Changes made to the processing of fats in  
48  
49 297 Questions 6 and 7 in Part 2 of the FFQ, in addition to changes made to the fatty acid profile of the  
50  
51 298 three new fats, could help explain the small differences observed in monounsaturated,  
52  
53 299 polyunsaturated and saturated fat intakes.  
54  
55  
56  
57  
58  
59  
60

1  
2 300 There was quite a large range in intake in the fourteen food groups, with a minimum intake of  
3  
4 301 zero for each of the food groups. It is difficult to compare food group intake data as the groupings  
5  
6 302 of foods often varies. However, the combined mean intake of fruit (excluding juices) and  
7  
8 303 vegetables for men and women was 467g and 562g respectively, achieving the Government's  
9  
10 304 'Five a day' recommendation(23), using a portion size of 80 g.

11  
12 305 Whilst text matching only affected one food group (cereals and cereal products), more than 15%  
13  
14 306 of men and women changed quintile for a number of nutrients: Englyst fibre, polyunsaturated fat,  
15  
16 307 folate, vitamin D and vitamin E, and iron (women only). Yet again, these nutrients related to the  
17  
18 308 text matching of breakfast cereals and baking and frying fats. The inclusion of these data  
19  
20 309 illustrates the effect of text matching on the ranking of individuals for certain nutrients and will  
21  
22 310 enable future researchers using FETA to make informed decisions on the benefit of text matching  
23  
24 311 for their study.

25  
26 312 We have not addressed or discussed common FFQ issues, such as the number of items in a food  
27  
28 313 list or the use of a single average portion size, as these are not the focus of this paper and have  
29  
30 314 been reviewed previously (24,25).

31  
32 315 It is anticipated that future updates of FETA might contain a number of improvements and  
33  
34 316 overcome some of the limitations of FETA, currently released as version 2.53 for Windows and  
35  
36 317 Linux (last updated 15/03/2013 and 21/02/2013 respectively). The source code has been made  
37  
38 318 available online which enables users to make modifications and improvements to the program.  
39  
40 319 Currently, we have made available Windows and Linux versions and it is hoped that an OS X  
41  
42 320 version will follow soon. We are currently working on a Libreoffice version of the Microsoft  
43  
44 321 Access form-based entry tool.

45  
46 322 In conclusion, we have created a new, open source, standalone, cross-platform FFQ processing  
47  
48 323 tool, FETA, to produce nutrient and food group data for researchers using the EPIC-Norfolk  
49  
50 324 FFQ. The tool produces similar nutrient and food group values to the previously validated CAFÉ  
51  
52 325 program, but is more accessible. Although FETA was designed and based on the EPIC-Norfolk  
53  
54  
55  
56  
57  
58  
59  
60

1 326 FFQ, the program was created in such a way that it can be customised for different study  
2  
3  
4 327 populations. It is anticipated that the development and availability of FETA will be a useful  
5  
6 328 addition to the field of nutritional epidemiology and dietary public health.  
7

8 329

9 330

10 331

11 332

12 333

13 334

14 335

15 336

16 337

17 338

18 339

19 340

20 341

21 342

22 343

23 344

24 345

25 346

26 347

27 348

28 349

29 350

30 351

31 352

32 353

33 354

34 355

35 356

36 357

37 358

38 359

39 60

1  
2 360  
3  
4 361  
5  
6 362  
7  
8 363  
9  
10 364  
11  
12 365  
13  
14 366  
15  
16 367  
17  
18 368  
19  
20 369  
21  
22 370  
23  
24 371  
25  
26 372  
27  
28 373  
29  
30 374  
31  
32  
33 375  
34  
35 376  
36  
37 377  
38  
39 378  
40  
41 379  
42  
43  
44 380  
45  
46 381  
47  
48 382  
49  
50 383  
51  
52 384  
53  
54 385  
55  
56 386  
57  
58  
59  
60

### **Acknowledgments**

We thank Mr Adam Dickinson, senior data manager at the MRC Epidemiology Unit, and his team members for their contribution to project management of FETA; Professor Nick Wareham, as EPIC-Norfolk study PI; and Mr Jamal Natour, as FETA software developer. The authors would also like to thank all the participants of the EPIC-Norfolk study and the EPIC-Norfolk staff for their help with this work.

### **Contributors**

AAM contributed to the software development, assisted in statistical analyses and drafted the manuscript. AB and RL contributed to the software development, assisted in statistical analyses and contributed to the manuscript. DJP-S wrote the step-based graphical wizard for running FETA and contributed to the manuscript. NGF, LO'C and K-TK (Principal Investigator of EPIC-Norfolk) contributed to the manuscript. APK created the Microsoft Access form-based entry tool and contributed to the manuscript. All authors approved the final manuscript.

### **Funding**

This study was supported by programme grants from the MRC Population Health Sciences Research Network (PHSRN), Cancer Research UK (C864/A8257) and the Medical Research Council (G0401527 and G1000143); NGF was supported by the Medical Research Council (MC\_UP\_A100\_1003); APK is funded by a Wellcome Trust Clinical Research Fellowship.

**Competing interests** None.

**Data Sharing Statement:** Epic-Norfolk has a wide range of collaborators. Contact details, publications and the process for collaborating and data requests can be found on the website ([www.epic-norfolk.org.uk](http://www.epic-norfolk.org.uk)).

**Ethics approval** Norwich Local Research Ethics Committee.



387 **References**

- 388 1. Subar AF. Developing dietary assessment tools. *J Am Diet Assoc* 2004 May;**104**(5):769–  
389 70. [www.ncbi.nlm.nih.gov/pubmed/15127062](http://www.ncbi.nlm.nih.gov/pubmed/15127062) (accessed 5 Nov 2013).
- 390 2. Welch AA, Luben R, Khaw KT, et al. The CAFE computer program for nutritional  
391 analysis of the EPIC-Norfolk food frequency questionnaire and identification of extreme  
392 nutrient values. *J Hum Nutr Diet* 2005;**18**(2):99–116.
- 393 3. Bingham SA, Gill C, Welch A, et al. Validation of dietary assessment methods in the UK  
394 arm of EPIC using weighed records, and 24-hour urinary nitrogen and potassium and  
395 serum vitamin C and carotenoids as biomarkers. *Int J Epidemiol* 1997;**26**(1):S137–S151.
- 396 4. Bingham SA, Welch AA, McTaggart A, et al. Nutritional methods in the European  
397 Prospective Investigation of Cancer in Norfolk. *Public Health Nutr* 2001;**4**(3):847–58.
- 398 5. McKeown NM, Day NE, Welch AA, et al. Use of biological markers to validate self-  
399 reported dietary intake in a random sample of the European Prospective Investigation into  
400 Cancer United Kingdom Norfolk cohort. *Am J Clin Nutr* 2001;**74**:188–96.
- 401 6. Rimm EB, Giovannucci EL, Stampfer MJ, et al. Reproducibility and validity of an  
402 expanded self-administered semiquantitative food frequency questionnaire among male  
403 health professionals. *Am J Epidemiol* 1992 May;**135**(10):1114–26.  
404 [www.ncbi.nlm.nih.gov/pubmed/1632423](http://www.ncbi.nlm.nih.gov/pubmed/1632423) (accessed 5 Nov 2013).
- 405 7. Bingham SA, Gill C, Welch A, et al. Comparison of dietary assessment methods in  
406 nutritional epidemiology: weighed records v. 24 h recalls, food-frequency questionnaires  
407 and estimated-diet records. *Br J Nutr* 1994;**72**(4):619–43.

- 1  
2 408 8. Day N, Oakes S, Luben R, et al. EPIC-Norfolk: study design and characteristics of the  
3  
4 409 cohort. European Prospective Investigation of Cancer. Br J Cancer 1999 Jul;**80**(Suppl  
5  
6 410 1):95–103. www.ncbi.nlm.nih.gov/pubmed/10466767 (accessed 5 Nov 2013).  
7  
8  
9  
10 411 9. Gregory J, Foster K, Tyler H, et al.. The Dietary and Nutritional Survey of British Adults.  
11  
12 412 London: Her Majesty's Stationary Office (HMSO) 1990.  
13  
14  
15 413 10. MAFF. The Dietary and Nutritional Survey of British Adults - Further Analysis. London:  
16  
17 414 Her Majesty's Stationary Office (HMSO) 1994.  
18  
19  
20 415 11. MAFF. Food Portion Sizes. 2nd ed. London: Her Majesty's Stationary Office (HMSO)  
21  
22 416 1993.  
23  
24  
25  
26 417 12. Holland B, Unwin I, Buss D. Cereals and cereal products. The third supplement to  
27  
28 418 McCance & Widdowson's The Composition of Foods (4th Edition). Cambridge:  
29  
30 419 RSC/MAFF 1988.  
31  
32  
33  
34 420 13. Holland B, Unwin I, Buss D. Milk products and eggs. The fourth supplement to McCance  
35  
36 421 & Widdowson's The Composition of Foods (4th Edition). Cambridge: RSC/MAFF 1989.  
37  
38  
39  
40 422 14. Holland B, Welch AA, Unwin D, et al.. McCance and Widdowson's The Composition of  
41  
42 423 Foods. Cambridge: Royal Society of Chemistry (RSC) 1991.  
43  
44  
45 424 15. Holland B, Unwin I, Buss D. Vegetables, herbs and spices. The fifth supplement to  
46  
47 425 McCance & Widdowson's The Composition of Foods (4th Edition). Cambridge:  
48  
49 426 RSC/MAFF 1991.  
50  
51  
52  
53 427 16. Holland B, Unwin I, Buss D. Fruit and nuts. The first supplement to McCance &  
54  
55 428 Widdowson's The Composition of Foods (5th Edition). Cambridge: RSC/MAFF 1992.  
56  
57  
58  
59  
60

- 1  
2 429 17. Holland B, Welch A, Buss D. Vegetable dishes. The second supplement to McCance &  
3  
4 430 Widdowson's The Composition of Foods (5th Edition). Cambridge: RSC/MAFF 1992.  
5  
6  
7 431 18. Holland B, Brown J, Buss D. Fish and fish products. The third supplement to McCance &  
8  
9 432 Widdowson's The Composition of Foods (5th Edition). Cambridge: RSC/MAFF 1993.  
10  
11  
12 433 19. Chan W, Brown J, Buss D. Miscellaneous foods. The fourth supplement to McCance &  
13  
14 434 Widdowson's The Composition of Foods (5th Edition). Cambridge: RSC/MAFF 1994.  
15  
16  
17  
18 435 20. Chan W, Brown J, Lee S, et al.. Meat, poultry and game. The fifth supplement to McCance  
19  
20 436 & Widdowson's The Composition of Foods (5th Edition). Cambridge: RSC/MAFF 1995.  
21  
22  
23  
24 437 21. Chan W, Brown J, Church S, et al. Meat products and dishes. The sixth supplement to  
25  
26 438 McCance & Widdowson's The Composition of Foods (5th Edition). Cambridge:  
27  
28 439 RSC/MAFF 1996.  
29  
30  
31  
32 440 22. COMA. Dietary Reference Values for Food Energy and Nutrients for the United Kingdom.  
33  
34 441 London: Her Majesty's Stationary Office (HMSO) 1991.  
35  
36  
37 442 23. Department of Health. [www.nhs.uk/Livewell/5ADAY/Pages/5ADAYhome.aspx](http://www.nhs.uk/Livewell/5ADAY/Pages/5ADAYhome.aspx)  
38  
39 443 (accessed 5 Nov 2013).  
40  
41  
42  
43 444 24. Cade JE, Burley VJ, Warm DL, et al. Food-frequency questionnaires: a review of their  
44  
45 445 design, validation and utilisation. *Nutr Res Rev* 2004 Jun;**17**(1):5–22.  
46  
47 446 [www.ncbi.nlm.nih.gov/pubmed/19079912](http://www.ncbi.nlm.nih.gov/pubmed/19079912) (accessed 30 Oct 2013).  
48  
49  
50  
51 447 25. Molag ML, de Vries JHM, Ocké MC, et al. Design characteristics of food frequency  
52  
53 448 questionnaires in relation to their validity. *Am J Epidemiol* 2007 Dec;**166**(12):1468–78.  
54  
55 449 [www.ncbi.nlm.nih.gov/pubmed/17881382](http://www.ncbi.nlm.nih.gov/pubmed/17881382) (accessed 5 Nov 2013).  
56  
57  
58 450  
59  
60

1  
2 451 **Figure Legends**  
3

4  
5 452 **Figure 1:** Part 1 (main part) of the EPIC-Norfolk FFQ, illustrating bread, savoury biscuits and  
6  
7 453 breakfast cereals  
8  
9

10 454 **Figure 2:** Questions from part 2 of the EPIC-Norfolk FFQ, used by FETA  
11  
12  
13  
14  
15  
16  
17  
18  
19  
20  
21  
22  
23  
24  
25  
26  
27  
28  
29  
30  
31  
32  
33  
34  
35  
36  
37  
38  
39  
40  
41  
42  
43  
44  
45  
46  
47  
48  
49  
50  
51  
52  
53  
54  
55  
56  
57  
58  
59  
60

For peer review only

1  
2  
3  
4  
5  
6  
7  
8  
9  
10  
11  
12  
13  
14  
15  
16  
17  
18  
19  
20  
21  
22  
23  
24  
25  
26  
27  
28  
29  
30  
31  
32  
33  
34  
35  
36  
37  
38  
39  
40  
41  
42  
43  
44  
45  
46  
47  
48  
49  
50  
51  
52  
53  
54  
55  
56  
57  
58  
59  
60

1 A new tool for converting food frequency questionnaire data into nutrient and food group values:  
2 FETA research methods and availability

3  
4 Angela A Mulligan<sup>a1 c1</sup>, Robert N Luben<sup>a1</sup>, Amit Bhaniani<sup>a1</sup>, David J Parry-Smith<sup>a1</sup>, Laura  
5 O'Connor<sup>a2</sup>, Anthony P Khawaja<sup>a1</sup>, Nita G Forouhi<sup>\*a2</sup>, Kay-Tee Khaw<sup>\*a1, a3</sup>

6  
7 \* indicates equal contribution as authors

8 <sup>a1</sup> European Prospective Investigation into Cancer and Nutrition, Department of Public Health and  
9 Primary Care, University of Cambridge, Strangeways Research Laboratory, Worts Causeway,  
10 Cambridge, UK

11 <sup>a2</sup> MRC Epidemiology Unit, Institute of Metabolic Science, Addenbrooke's Hospital, University of  
12 Cambridge, Cambridge, UK

13 <sup>a3</sup> EPIC, Department of Gerontology, Addenbrooke's Hospital, School of Clinical Medicine,  
14 University of Cambridge, Cambridge, UK

15  
16 Source of support: MRC Population Health Sciences Research Network (PHSRN), Cancer Research  
17 UK (C864/A8257) and the Medical Research Council (G0401527, G1000143)

18  
19 Running title: FETA: new processing tool for FFQs

20  
21 **Key words:** food frequency questionnaire, nutritional output, processing tool, EPIC-Norfolk

22  
23  
24 **Correspondence:**

25 <sup>c1</sup> Corresponding author: Ms A. Mulligan, telephone +44 1223 748683, fax +44 1223 748676, email  
26 [angela.mulligan@phpc.cam.ac.uk](mailto:angela.mulligan@phpc.cam.ac.uk)

27  
28 **Abbreviations:** FFQ, food frequency questionnaire; EPIC, European Prospective Investigation into  
29 Cancer and Nutrition; FETA, FFQ EPIC Tool for Analysis; CAFÉ, Compositional Analyses from  
30 Frequency Estimates

31  
32 | Word count: 3 ~~380254~~

## ABSTRACT

### Objectives

To describe the research methods for the development of a new [open source, cross-platform](#) tool which processes data from the European Prospective Investigation into Cancer and Nutrition Norfolk Food Frequency Questionnaire (EPIC-Norfolk FFQ). A further aim was to compare nutrient and food group values derived from the current tool (FETA; FFQ EPIC Tool for Analysis) with the previously validated but less accessible tool, CAFÉ (Compositional Analyses from Frequency Estimates). The effect of text matching on intake data was also investigated.

### Design

Cross-sectional analysis of a prospective cohort study – EPIC-Norfolk.

### Setting

East England population (city of Norwich and its surrounding small towns and rural areas).

### Participants

Complete FFQ data from 11 250 men and 13 602 women ~~with a~~ (mean age ~~of~~ 59 years; ~~(range~~ 40 – 79 years).

### Outcome measures

Nutrient and food group intakes derived from FETA and CAFÉ analyses of EPIC-Norfolk FFQ data.

### Results

Nutrient outputs from FETA and CAFÉ were similar; mean (SD) energy intake from FETA was 9222 kJ (2633) in men, 8113 kJ (2296) in women, compared to CAFÉ intakes of 9175 kJ (2630) in men, 8091 kJ (2298) in women. The majority of differences resulted in one or less quintile change (98.7%). Only mean daily fruit and vegetable food group intakes were higher in women than in men (278 v 212 g and 284 v 255 g respectively). Quintile changes were evident for all nutrients, with the exception of alcohol, when text matching was not executed; however, only the cereals food group was affected.

## Conclusions

FETA produces similar nutrient and food group values to the previously validated CAFÉ but has the advantages of being open source, cross-platform and complete with a data-entry form directly compatible with the software. The tool will facilitate research using the EPIC-Norfolk FFQ, and can be customised for different study populations.

## Strengths and limitations of this study

- FETA has been tested using a large study sample of food intake data.
- No independent reference method used in the comparisons of FETA and CAFÉ nutrient intake data although the CAFÉ system has been previously validated.

## INTRODUCTION

Food Frequency Questionnaires (FFQs) are commonly used in epidemiological studies to assess the dietary intake of large populations. Their popularity derives from ease of administration, ability to assess dietary intake over a defined period of time, and low costs (1). The European Prospective Investigation into Cancer and Nutrition (EPIC)-Norfolk FFQ is semi-quantitative and designed to record the average intake of foods during the previous year. The principles involved in data collection and processing of the EPIC-Norfolk FFQ and the development of the structure and content of the CAFÉ program for calculating nutrient intakes have been published previously (2). The EPIC-Norfolk FFQ has been extensively validated and has been widely used (3);(4);(5). However, the programs used to process these FFQs, including CAFÉ, have not been easily accessible to end-users.

Our objectives were to develop a new, open source, cross-platform processing tool (FETA - FFQ EPIC Tool for Analysis) based on and building upon the earlier system, CAFÉ (2). The aim of this report was to describe the research methods of the development of FETA, and to compare nutrient output from the FETA and CAFÉ programs. Food group intake data from FETA has also been described as has the effect of free text matching on nutrient and food group intake data. [Free text](#)

1  
2  
3  
4  
5  
6 85 matching refers to the assigning of an appropriate food code to hand-written text in the FFQ and  
7  
8 86 will be further described in the methods section.  
9  
10 87

## 11 12 88 **METHODS**

### 13 14 89 **EPIC-FFQ design**

15 90 The questionnaire consists of two parts. Part 1 consists of a food list of 130 lines; each line has a  
16 91 portion size attached to it: medium serving, standard unit or household measure. Study participants  
17 92 were requested to select an appropriate frequency of consumption for each line, from the nine  
18 93 frequency categories. As an example, Figure 1 illustrates the sections relating to bread, savoury  
19 94 biscuits and breakfast cereals. A pdf copy of the EPIC-Norfolk FFQ may be downloaded from  
20 95 <http://www.srl.cam.ac.uk/epic/epicffq/websitedocumentation.html>; information on how to complete  
21 96 and code the FFQ is also available here. The questionnaire lines are either individual foods,  
22 97 combinations of individual foods or food types. The FFQ food list is based on items from an FFQ  
23 98 widely used within the USA (6);(7), but modified to reflect differences in American versus UK  
24 99 brand names and some further food items were added.

25 100 Part 2 contains further questions, a number of which ask for more detailed information that link  
26 101 back to food lines in part one, as illustrated in Figure 2. Detailed information was requested for  
27 102 breakfast cereals and fats as these are nutritionally important foods in the UK diet.  
28 103

### 29 104 **Data collection**

30 105 The EPIC-Norfolk FFQ was posted to 25 639 participants in the EPIC-Norfolk cohort study (8).  
31 106 The participants were aged 40-79 years and the questionnaire was completed between 1993 and  
32 107 1997. The study was approved by the Norfolk Local Research Ethics Committee, adhered to the  
33 108 Declaration of Helsinki and all participants gave written informed consent. The FFQ was returned  
34 109 at a health examination, where it was checked and completed, if required, by trained nursing staff.  
35 110 In total, 25 351 (99%) participants returned the completed questionnaire.

### 36 111 **Comparison of FETA and CAFÉ programs**



1  
2  
3  
4  
5  
6 111 FETA uses a csv (comma-separated values) input file. Part 1 is coded as numeric values and Part 2  
7  
8 112 is coded as numeric values and food codes, using the flow-charts and look-up lists provided  
9  
10 113 (<http://www.srl.cam.ac.uk/epic/epicffq/>). We have also created a Microsoft Access form-based  
11  
12 114 entry tool to facilitate FFQ data entry, based on the EPIC-Norfolk FFQ. The tool exports data in a  
13  
14 115 format directly compatible with FETA. The FETA software was written in C and C++ languages,  
15  
16 116 enabling faster processing times than SAS and the C/C++ software can also be used from the  
17  
18 117 command line. The step-based graphical wizard for running FETA was written in Perl. Whereas in  
19  
20 118 the CAFÉ program, an Oracle (Oracle Corporation, Redwood Shores, CA, USA) -based entry  
21  
22 119 system was created to enter Part 1 frequency data as numeric codes and Part 2 data as numeric  
23  
24 120 codes and free text. CAFÉ was written using SAS (SAS Software, Version 8 of the SAS System for  
25  
26 121 Unix, SAS Institute Inc., Cary, NC, USA) and links to tables in an Oracle relational database.

#### 27 122 **Part 1- data entry**

28  
29 123 Data were manually entered into a spreadsheet as numeric codes, using '1' for 'never or less than  
30  
31 124 once a month', to '9' for '6+ times per day'. A code of '-9' was used to mark data where a  
32  
33 125 frequency was not recorded. Where two frequencies were provided for a line, ~~thisese wasere coded~~  
34  
35 126 as '-4' and treated by both CAFÉ and FETA programs as missing data. However, in FETA, both  
36  
37 127 frequencies may now be entered both-coded, separated by a semi-colon, e.g. '2;3', and FETA will  
38  
39 128 processed the first value. In the CAFÉ program, two entries per line were treated as missing data.

#### 40 129 **Part 2 – assigning of food codes to ticked boxes and free text**

41  
42 130 Part 2 contains hand-written text for milk, breakfast cereals and cooking fats (see Figure 2,  
43  
44 131 questions 3, 5, 6 and 7 respectively), which needs to be matched to the most appropriate food code  
45  
46 132 in order to obtain nutrient data; this process is known as free text matching. The data in part 2 were  
47  
48 133 coded using reference lists of food codes for varieties of milk, breakfast cereal and cooking fat.  
49  
50 134 Where there is no clear match, it is suggested that a researcher consults the ingredients and nutrient  
51  
52 135 information of the commercial item and compares this information with the nutrient profile of  
53  
54 136 similar items from the reference lists. These reference lists and figures relating to food codes that

1  
2  
3  
4  
5  
6 137 may be assigned to appropriate ticked boxes may be found at

7  
8 138 <http://www.srl.cam.ac.uk/epic/epicffq/websitedocumentation.html>

9  
10 139 Differences between FETA versus CAFÉ processing may also be found at

11  
12 140 <http://www.srl.cam.ac.uk/epic/epicffq/websitedocumentation.html>; these differences relate to

13  
14 141 breakfast cereals, frying and baking fats, the outcome of selecting the ‘None’ or ‘No’ box, and

15  
16 142 default milk, cereal, and fat codes.

### 17 143 **Databases**

18  
19 144 Each line in Part 1 of the FFQ is mapped to up to six food codes. Decisions regarding which food

20  
21 145 codes to use were based on data from UK government surveys and other UK population data (7);

22  
23 146 (7,9,10). These decisions were based on data for individuals aged 40-74 years (7). Data for portion

24  
25 147 weights were sourced from UK population data and weighed records in 40-74 year old study

26  
27 148 participants (7,11).

28  
29 149 The EPIC-Norfolk FFQ uses 290 foods from the UK food composition database, McCance and

30  
31 150 Widdowson’s “The Composition of Foods” (5<sup>th</sup> edition) and its associated supplements (12–21). A

32  
33 151 number of new food items were added to the EPIC-Norfolk FFQ food list, which are used in both

34  
35 152 ~~the~~ FETA and CAFÉ programs. These include low calorie/diet fizzy drinks and crunchy oat

36  
37 153 cereal, as well as modified home-baked and fried foods (without their fat), to enable an individual’s

38  
39 154 fat type, as recorded in Part 2 of the FFQ, to be incorporated. However, the nutrient data of six of

40  
41 155 the nine new foods used in the CAFÉ program were modified in FETA. These foods include

42  
43 156 crunchy oat cereal, milk non-specific, low calorie/diet fizzy drinks, solid vegetable oil, Crisp ‘n Dry

44  
45 157 (solid fat), and oil and fat non-specific. Modifications to the nutrient data were made to ensure a

46  
47 158 more accurate nutrient profile and/or to better reflect the foods consumed, ~~in~~ in the case of non-

48  
49 159 specific items, such as milk and oil/fat; these changes relate to nutrient/food data at the time of FFQ

50  
51 160 completion-

### 52 161 **Identification of outliers**

1  
2  
3  
4  
5  
6  
7  
8  
9  
10  
11  
12  
13  
14  
15  
16  
17  
18  
19  
20  
21  
22  
23  
24  
25  
26  
27  
28  
29  
30  
31  
32  
33  
34  
35  
36  
37  
38  
39  
40  
41  
42  
43  
44  
45  
46  
47  
48  
49  
50  
51  
52  
53  
54  
55  
56  
57  
58  
59  
60

Outliers were defined, as detailed previously (2). In brief, the ratio of energy intake (EI) to basal metabolic rate (BMR) was calculated, where BMR was calculated using sex-specific Schofield equations, which included age and body weight (22). Individuals in the top and bottom 0.5% of EI: BMR ratio were identified and excluded, as were individuals with FFQs containing 10 or more missing lines of data in Part 1 of the FFQ.

### **Nutrient and food group outputs**

FETA produces four nutrient output formats and a sample of each of these can be viewed at

<http://www.srl.cam.ac.uk/epic/epicffq/websitedocumentation.html>

Output 1 contains average daily nutrient and food group intakes for an individual from all FFQ foods consumed, in wide format, suitable for import into a spreadsheet or statistical package. Intake data for 46 nutrients are provided as well as data for 14 basic food groups, however only a selection of these nutrients is shown in this report. Output 2 contains the same nutrient intake data as output 1, but in long format, which is mostly suitable for programmers. Output 3 contains average daily nutrient and food group intakes (and amount of food consumed) for an individual for each FFQ line; this output file will be very large and is mostly suitable for programmers. The most detailed output (output 4) contains average daily nutrient and food group intakes, in addition to the amount of food consumed for an individual, for each food code, for each FFQ line (meal\_id). An online description of each meal\_id and nutrient code, including units of measurement, can be found in the data entry template. This output will also be very large and is mostly suitable for programmers.

A log file is created along with each output file, which records the processing of the data and provides useful error information (see Appendix 1 for log file of output 1). In these files, both notes (general process information) and error messages are recorded, with a date and time stamp. The log files make it possible to calculate the number of missing frequencies based on Part 1 (main grid) of the FFQ in order to exclude individuals with 10 or more missing ticks. The log files also record situations where a food code does not have any nutrient data attached to it.

### **Statistical analyses**

1  
2  
3  
4  
5  
6 188 The data were analysed using STATA 10 (STATA Corp., Texas, USA). Intake data were described  
7  
8 189 using mean, standard deviation (SD), median, minimum and maximum for both FETA and CAFÉ  
9  
10 190 program outputs, stratified by sex. The nutrients selected for comparison are those described in the  
11  
12 191 original CAFÉ paper. Where data on quintile changes are shown, cut-off points were calculated  
13  
14 192 using CAFÉ nutrient data in order to compare quintile shift between FETA and CAFÉ output data.  
15  
16 193

## 17 194 RESULTS

19 195 ~~We received~~ There were FFQs data available from 25 351 participants (11 451 men and 13 900  
20  
21 196 women), with a mean age of 59 years. From this set, 249 FFQs (90 men and 159 women)  
22  
23 197 containing 10 or more missing lines of data in Part 1 of the FFQ were excluded, followed by a  
24  
25 198 further exclusion of 250 FFQs (111 men and 139 women) from the top and bottom 0.5% of  
26  
27 199 EI:BMR. This resulted in the final analytical dataset of 24 852 participants Data from (11 250 men  
28  
29 200 and 13 602 women), are presented here, as individuals in the top and bottom 0.5% of EI: BMR ratio  
30  
31 201 have been excluded, as have individuals with FFQs containing 10 or more missing lines of data in  
32  
33 202 Part 1 of the FFQ.

### 34 203 Nutrient intake data from FETA and CAFÉ programs

36 204 Table 1 shows the average daily intake data for a number of selected nutrients for 11 250 men. The  
37  
38 205 data were similar for most nutrients across the two programs. The nutrients which had the highest  
39  
40 206 percentage of quintile change ( $\geq 10\%$ ) were monounsaturated fat, saturated fat, iron, vitamin D &  
41  
42 207 vitamin E. However, only 1.3% of the men changed more than one quintile, for two of these five  
43  
44 208 nutrients. The nutrients which had the lowest percentage of quintile changes were alcohol, calcium  
45  
46 209 and carotene, with less than 3% change (Table 1).

47  
48 210 Table 2 shows average daily intake data for the selected nutrients for 13 602 women, from FETA  
49  
50 211 and CAFÉ programs. There were similar quintile changes observed in women to those found in men  
51  
52 212 for the selected nutrients; four of the nineteen nutrients had a quintile change of greater than 10%:  
53  
54 213 polyunsaturated fat, saturated fat, iron and Vitamin E. However, the number of women who shifted  
55  
56  
57  
58  
59  
60

1  
2  
3  
4  
5  
6  
7  
8  
9  
10  
11  
12  
13  
14  
15  
16  
17  
18  
19  
20  
21  
22  
23  
24  
25  
26  
27  
28  
29  
30  
31  
32  
33  
34  
35  
36  
37  
38  
39  
40  
41  
42  
43  
44  
45  
46  
47  
48  
49  
50  
51  
52  
53  
54  
55  
56  
57  
58  
59  
60

more than one quintile was generally lower than the number observed in men. The nutrients which had the greatest percentage of women who changed more than one quintile were vitamins D and E, with 0.7 and 0.9% respectively.

Detailed (output 4) nutrient intake data at the individual level obtained from the two programs were compared for approximately half of the participants (n=12 500; data not shown). All differences (> 0.1%) found were investigated and explanations for these differences are considered in the discussion.

For peer review only

Table 1 Average daily nutrient intakes for men (N=11 250) participating in the EPIC-Norfolk study, from the FETA and CAFÉ programs, after the exclusion of outliers, with numbers and percentages of men who moved quintile

| Nutrient                | FETA program |      |      |          |          | CAFÉ program |      |      |          |          | Quintile        |      |            |     |
|-------------------------|--------------|------|------|----------|----------|--------------|------|------|----------|----------|-----------------|------|------------|-----|
|                         | Median       | Mean | SD   | Mini mum | Maxi mum | Median       | Mean | SD   | Mini mum | Maxi mum | Quintile change |      | change > 1 |     |
|                         |              |      |      |          |          |              |      |      |          |          | N               | %    | N          | %   |
| Energy (kcal)           | 2126         | 2190 | 627  | 748      | 5085     | 2115         | 2179 | 626  | 748      | 5101     | 892             | 7.9  | 0          | 0.0 |
| Energy (kJ)             | 8947         | 9222 | 2633 | 3124     | 21394    | 8900         | 9175 | 2630 | 3124     | 21440    | 891             | 7.9  | 0          | 0.0 |
| Protein (g)             | 83.4         | 85.2 | 22.0 | 23.3     | 319.8    | 83.2         | 84.9 | 22.0 | 23.3     | 318.4    | 464             | 4.1  | 0          | 0.0 |
| Alcohol (g)             | 6.7          | 12.3 | 16.1 | 0.0      | 134.2    | 6.7          | 12.3 | 16.1 | 0.0      | 134.2    | 0               | 0.0  | 0          | 0.0 |
| Carbohydrate (g)        | 261          | 271  | 87   | 48       | 737      | 259          | 269  | 87   | 48       | 729      | 726             | 6.5  | 0          | 0.0 |
| Starch (g)              | 123          | 128  | 45   | 10       | 504      | 122          | 127  | 45   | 10       | 501      | 813             | 7.2  | 1          | 0.0 |
| Englyst fibre (g)       | 17.5         | 18.2 | 6.4  | 1.3      | 89.9     | 17.3         | 18.0 | 6.4  | 1.3      | 89.9     | 743             | 6.6  | 1          | 0.0 |
| Fat (g)                 | 78.9         | 83.2 | 31.3 | 13.4     | 260.6    | 78.7         | 83.0 | 31.3 | 13.4     | 260.6    | 1049            | 9.3  | 8          | 0.1 |
| Monounsaturated fat (g) | 27.0         | 28.8 | 11.6 | 4.8      | 101.2    | 26.8         | 28.5 | 11.5 | 4.8      | 105.1    | 1264            | 11.2 | 21         | 0.2 |
| Polyunsaturated fat (g) | 13.5         | 15.0 | 6.9  | 1.6      | 66.6     | 13.7         | 15.3 | 7.1  | 1.6      | 69.5     | 1074            | 9.5  | 24         | 0.2 |
| Saturated fat (g)       | 30.1         | 32.3 | 13.6 | 3.0      | 110.6    | 29.8         | 31.9 | 13.5 | 3.0      | 106.7    | 1288            | 11.5 | 20         | 0.2 |
| Calcium (mg)            | 1021         | 1039 | 301  | 189      | 2848     | 1018         | 1037 | 300  | 189      | 2849     | 296             | 2.6  | 1          | 0.0 |
| Iron (mg)               | 12.1         | 12.4 | 3.6  | 2.6      | 38.7     | 11.9         | 12.3 | 3.5  | 2.5      | 38.5     | 1149            | 10.2 | 7          | 0.1 |
| Potassium (mg)          | 3814         | 3881 | 911  | 1305     | 11718    | 3802         | 3869 | 909  | 1284     | 11718    | 411             | 3.7  | 0          | 0.0 |

Formatted Table

Formatted: Right

Formatted: Right

1  
2  
3  
4  
5  
6  
7  
8  
9  
10  
11  
12  
13  
14  
15  
16  
17  
18  
19  
20  
21  
22  
23  
24  
25  
26  
27  
28  
29  
30  
31  
32  
33  
34  
35  
36  
37  
38  
39  
40  
41  
42  
43  
44  
45  
46  
47  
48  
49

|                 |      |      |      |      |       |      |      |      |      |       |      |      |     |     |
|-----------------|------|------|------|------|-------|------|------|------|------|-------|------|------|-----|-----|
| Carotene (mcg)  | 3188 | 3321 | 1573 | 147  | 25720 | 3178 | 3309 | 1571 | 147  | 25720 | 156  | 1.4  | 0   | 0.0 |
| Folate (mcg)    | 320  | 331  | 97   | 77   | 1547  | 316  | 327  | 96   | 77   | 1547  | 836  | 7.4  | 3   | 0.0 |
| Vitamin C (mg)  | 103  | 111  | 52   | 10   | 669   | 105  | 113  | 52   | 10   | 669   | 411  | 3.7  | 14  | 0.1 |
| Vitamin D (mcg) | 3.16 | 3.65 | 2.08 | 0.03 | 27.08 | 3.13 | 3.62 | 2.06 | 0.03 | 27.12 | 1161 | 10.3 | 145 | 1.3 |
| Vitamin E (mg)  | 13.2 | 14.9 | 7.2  | 2.1  | 62.3  | 12.9 | 14.4 | 6.8  | 2.1  | 62.0  | 1545 | 13.7 | 146 | 1.3 |

For peer review only

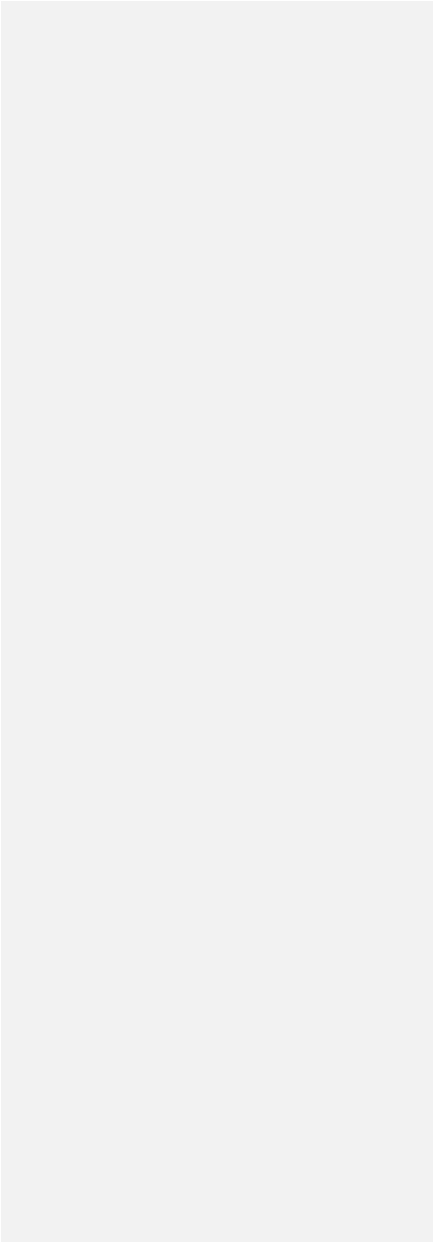

Table 2 Average daily nutrient intakes for women (N=13 602) participating in the EPIC-Norfolk study, from the FETA and CAFÉ programs, after the exclusion of outliers, with numbers and percentages of women who moved quintile

| Nutrient                | FETA program |      |      |          |          | CAFÉ program |      |      |          |          | Quintile change |      |                     |     |
|-------------------------|--------------|------|------|----------|----------|--------------|------|------|----------|----------|-----------------|------|---------------------|-----|
|                         | Median       | Mean | SD   | Mini mum | Maxi mum | Median       | Mean | SD   | Mini mum | Maxi mum | Quintile change |      | Quintile change > 1 |     |
|                         |              |      |      |          |          |              |      |      |          |          | N               | %    | N                   |     |
| Energy (kcal)           | 1859         | 1925 | 546  | 538      | 4733     | 1853         | 1920 | 547  | 518      | 4643     | 1030            | 7.6  | 0                   | 0.0 |
| Energy (kJ)             | 7833         | 8113 | 2296 | 2261     | 19910    | 7811         | 8091 | 2298 | 2179     | 19537    | 1018            | 7.5  | 0                   | 0.0 |
| Protein (g)             | 79.8         | 81.5 | 21.1 | 23.0     | 246.0    | 79.6         | 81.3 | 21.0 | 22.7     | 246.1    | 495             | 3.6  | 1                   | 0.0 |
| Alcohol (g)             | 2.0          | 5.6  | 8.4  | 0.0      | 99.5     | 2.0          | 5.6  | 8.4  | 0.0      | 99.5     | 0               | 0.0  | 0                   | 0.0 |
| Carbohydrate (g)        | 237          | 247  | 77   | 59       | 766      | 235          | 245  | 77   | 58       | 766      | 974             | 7.2  | 1                   | 0.0 |
| Starch (g)              | 107          | 112  | 39   | 13       | 405      | 106          | 111  | 39   | 13       | 406      | 1142            | 8.4  | 1                   | 0.0 |
| Englyst fibre (g)       | 18.2         | 19.0 | 6.8  | 2.3      | 118.5    | 18.0         | 18.8 | 6.7  | 2.4      | 118.6    | 850             | 6.2  | 1                   | 0.0 |
| Fat (g)                 | 67.0         | 70.8 | 27.1 | 11.7     | 221.0    | 67.2         | 71.2 | 27.3 | 11.6     | 217.2    | 1194            | 8.8  | 4                   | 0.0 |
| Monounsaturated fat (g) | 22.5         | 24.1 | 9.9  | 3.8      | 100.3    | 22.5         | 24.1 | 9.9  | 3.5      | 100.6    | 1338            | 9.8  | 7                   | 0.1 |
| Polyunsaturated fat (g) | 12.2         | 13.5 | 6.2  | 2.0      | 53.6     | 12.5         | 13.8 | 6.3  | 2.0      | 53.6     | 1434            | 10.5 | 23                  | 0.2 |
| Saturated fat (g)       | 25.0         | 27.0 | 11.7 | 3.6      | 102.3    | 25.0         | 26.9 | 11.7 | 3.7      | 99.3     | 1443            | 10.6 | 9                   | 0.1 |
| Calcium (mg)            | 971          | 992  | 290  | 128      | 3159     | 969          | 990  | 290  | 127      | 3159     | 390             | 2.9  | 4                   | 0.0 |
| Iron (mg)               | 11.5         | 11.8 | 3.6  | 1.7      | 66.1     | 11.3         | 11.7 | 3.5  | 1.8      | 65.7     | 1496            | 11.0 | 12                  | 0.1 |
| Potassium (mg)          | 3781         | 3861 | 942  | 1150     | 16568    | 3769         | 3848 | 939  | 1147     | 16587    | 486             | 3.6  | 1                   | 0.0 |
| Carotene (mcg)          | 3477         | 3719 | 1917 | 67       | 61971    | 3469         | 3712 | 1917 | 64       | 61983    | 122             | 0.9  | 0                   | 0.0 |

Formatted Table

Formatted: Right

Formatted: Right



1  
2  
3  
4  
5  
6  
7  
8  
9  
10  
11  
12  
13  
14  
15  
16  
17  
18  
19  
20  
21  
22  
23  
24  
25  
26  
27  
28  
29  
30  
31  
32  
33  
34  
35  
36  
37  
38  
39  
40  
41  
42  
43  
44  
45  
46  
47  
48  
49

|                 |      |      |      |      |       |      |      |      |      |       |      |      |     |     |
|-----------------|------|------|------|------|-------|------|------|------|------|-------|------|------|-----|-----|
| Folate (mcg)    | 322  | 332  | 103  | 65   | 2039  | 317  | 328  | 101  | 65   | 2024  | 1025 | 7.5  | 5   | 0.0 |
| Vitamin C (mg)  | 123  | 133  | 64   | 4    | 1006  | 125  | 135  | 64   | 4    | 1006  | 746  | 5.5  | 35  | 0.3 |
| Vitamin D (mcg) | 3.01 | 3.46 | 1.90 | 0.00 | 17.83 | 3.02 | 3.45 | 1.90 | 0.00 | 17.75 | 1119 | 8.2  | 90  | 0.7 |
| Vitamin E (mg)  | 12.4 | 13.8 | 6.2  | 1.5  | 52.4  | 12.2 | 13.5 | 6.0  | 1.6  | 49.8  | 1863 | 13.7 | 123 | 0.9 |

For peer review only

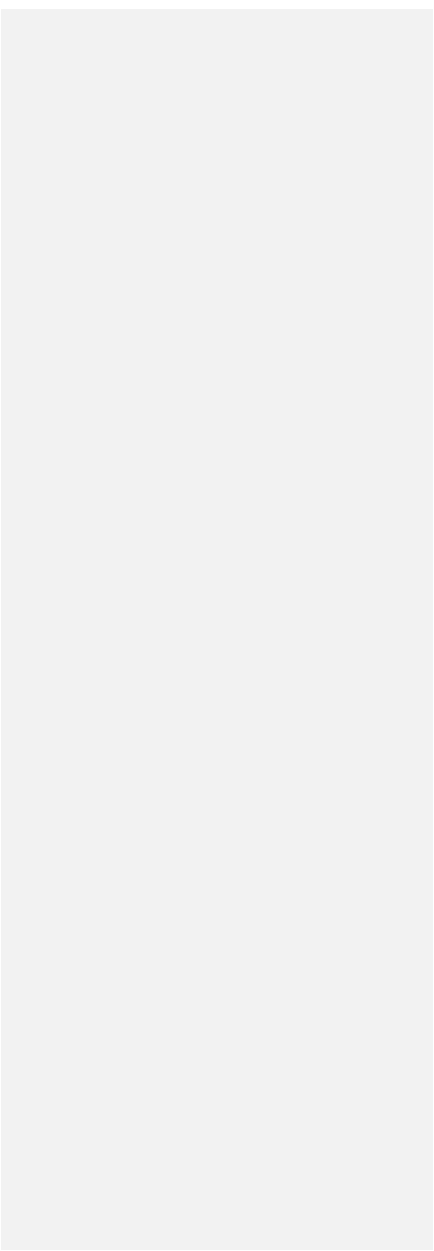

### Food group intake data from FETA

Average daily intakes for both men and women of the fourteen food groups readily available from FETA are shown in Table 3. Mean daily intakes of six of the food groups were higher in men than in women: alcohol, cereals, fats, meat, potatoes and sugars. However, women had higher intakes of fruit (278g v 212g) and vegetables (284g v 255g). Mean daily intakes of eggs, fish, milk, non-alcoholic beverages, nuts and seeds, and soups and sauces were similar in both men and women.

### The effect of text matching in FETA

Tables 4 and 5 illustrate the variation in nutrient and food group intake data obtained in a random subset of 1 159 men and 1 340 women, respectively, depending on whether text matching of milks, breakfast cereals and baking and frying fats was applied. In general, mean nutrient intakes were higher when text matching was carried out. In men, (Table 4), quintile changes (>15%) were most evident in the following nutrients: Englyst fibre, polyunsaturated fat, folate, vitamin D and vitamin E. The food group “cereals and cereal products” was the only one of the fourteen groups where there was a difference, with 31 men moving 1 quintile.

In women, (Table 5), quintile changes (>15%) were also most evident in the same five nutrients. However, almost 21% of women also changed quintile for iron. Once again, the “cereals and cereal products” food group was the only food group where there was any difference, with 40 women moving 1 quintile.

1  
2  
3  
4  
5  
6  
7  
8  
9  
10  
11  
12  
13  
14  
15  
16  
17  
18  
19  
20  
21  
22  
23  
24  
25  
26  
27  
28  
29  
30  
31  
32  
33  
34  
35  
36  
37  
38  
39  
40  
41  
42  
43  
44  
45  
46  
47  
48  
49

Table 3 Average daily food group intakes for men (N=11 250) and women (N=13 602) participating in the EPIC-Norfolk study, from the FETA program

| Food group                    | Men    |      |     |          |          | Women  |      |     |          |          |
|-------------------------------|--------|------|-----|----------|----------|--------|------|-----|----------|----------|
|                               | Median | Mean | SD  | Mini mum | Maxi mum | Median | Mean | SD  | Mini mum | Maxi mum |
| Alcoholic beverages (g)       | 101    | 204  | 315 | 0        | 2483     | 23     | 64   | 109 | 0        | 1728     |
| Cereals & cereal products (g) | 242    | 260  | 127 | 0        | 1456     | 215    | 231  | 110 | 0        | 1172     |
| Eggs & egg dishes (g)         | 18     | 17   | 15  | 0        | 225      | 14     | 16   | 14  | 0        | 236      |
| Fats & oils (g)               | 31     | 36   | 22  | 0        | 207      | 27     | 30   | 20  | 0        | 218      |
| Fish & fish products (g)      | 32     | 37   | 26  | 0        | 362      | 32     | 38   | 26  | 0        | 309      |
| Fruit (g)                     | 179    | 212  | 164 | 0        | 2654     | 238    | 278  | 201 | 0        | 3742     |
| Meat & meat products (g)      | 99     | 106  | 54  | 0        | 856      | 91     | 94   | 48  | 0        | 606      |
| Milk & milk products (g)      | 407    | 420  | 182 | 0        | 1303     | 386    | 410  | 175 | 0        | 1560     |
| Non-alcoholic beverages (g)   | 1157   | 1177 | 396 | 0        | 3707     | 1150   | 1165 | 403 | 0        | 4501     |
| Nuts & seeds (g)              | 0      | 3    | 9   | 0        | 228      | 0      | 3    | 9   | 0        | 188      |
| Potatoes (g)                  | 125    | 122  | 69  | 0        | 1007     | 116    | 112  | 64  | 0        | 1506     |
| Soups & sauces (g)            | 43     | 58   | 54  | 0        | 1004     | 43     | 57   | 53  | 0        | 1376     |
| Sugars (g)                    | 53     | 64   | 50  | 0        | 572      | 37     | 48   | 42  | 0        | 541      |
| Vegetables (g)                | 236    | 255  | 123 | 0        | 2398     | 262    | 284  | 143 | 0        | 3539     |

Table 4 Comparison of average daily nutrient and food group intakes for men (N=1 159) participating in the EPIC-Norfolk study, from the FETA program, with and without the application of text matching

| Nutrient/Food group     | FETA program,<br>with text matching |      |      |      |       | FETA program, without text<br>matching |      |      |      |       | Formatted Table |      |                     |     |
|-------------------------|-------------------------------------|------|------|------|-------|----------------------------------------|------|------|------|-------|-----------------|------|---------------------|-----|
|                         | Median                              | Mean | SD   | Mini | Maxi  | Median                                 | Mean | SD   | Mini | Maxi  | Quintile change |      | Quintile change > 1 |     |
|                         |                                     |      |      | mum  | mum   |                                        |      |      | mum  | mum   | N               | %    | N                   | %   |
| Energy (kcal)           | 2095                                | 2176 | 678  | 658  | 7766  | 2091                                   | 2170 | 678  | 658  | 7787  | 28              | 2.4  | 0                   | 0.0 |
| Energy (kJ)             | 8822                                | 9161 | 2848 | 2780 | 32555 | 8804                                   | 9138 | 2850 | 2780 | 32647 | 26              | 2.2  | 0                   | 0.0 |
| Protein (g)             | 82.8                                | 85.0 | 22.8 | 22.1 | 272.3 | 82.5                                   | 84.7 | 22.8 | 22.1 | 272.3 | 34              | 2.9  | 0                   | 0.0 |
| Alcohol (g)             | 7.2                                 | 12.3 | 16.1 | 0.0  | 112.9 | 7.2                                    | 12.3 | 16.1 | 0.0  | 112.9 | 0               | 0.0  | 0                   | 0.0 |
| Carbohydrate (g)        | 261                                 | 270  | 93   | 63   | 1006  | 259                                    | 269  | 93   | 63   | 1003  | 48              | 4.1  | 0                   | 0.0 |
| Starch (g)              | 120                                 | 127  | 49   | 7    | 643   | 121                                    | 126  | 48   | 7    | 636   | 65              | 5.6  | 0                   | 0.0 |
| Englyst fibre (g)       | 17.5                                | 18.3 | 6.6  | 3.6  | 71.8  | 17.3                                   | 17.9 | 6.3  | 3.6  | 64.5  | 198             | 17.1 | 10                  | 0.9 |
| Fat (g)                 | 77.8                                | 82.1 | 33.1 | 12.8 | 387.8 | 77.3                                   | 82.1 | 33.1 | 12.8 | 389.3 | 32              | 2.8  | 0                   | 0.0 |
| Monounsaturated fat (g) | 26.5                                | 28.2 | 12.2 | 3.5  | 131.1 | 26.7                                   | 28.7 | 12.5 | 3.7  | 138.7 | 88              | 7.6  | 0                   | 0.0 |
| Polyunsaturated fat (g) | 13.5                                | 14.9 | 7.3  | 3.0  | 67.0  | 12.7                                   | 14.1 | 6.8  | 3.0  | 60.7  | 179             | 15.4 | 17                  | 1.5 |
| Saturated fat (g)       | 30.1                                | 31.8 | 14.1 | 3.3  | 160.0 | 30.3                                   | 32.2 | 14.3 | 3.3  | 160.3 | 72              | 6.2  | 1                   | 0.1 |
| Calcium (mg)            | 1015                                | 1044 | 312  | 242  | 2848  | 1012                                   | 1044 | 313  | 242  | 2861  | 42              | 3.6  | 0                   | 0.0 |
| Iron (mg)               | 11.9                                | 12.5 | 3.8  | 2.6  | 37.9  | 11.7                                   | 12.0 | 3.5  | 2.6  | 38.1  | 173             | 14.9 | 16                  | 1.4 |
| Potassium (mg)          | 3824                                | 3889 | 957  | 1353 | 12675 | 3812                                   | 3873 | 951  | 1353 | 12551 | 52              | 4.5  | 0                   | 0.0 |

1  
2  
3  
4  
5  
6  
7  
8  
9  
10  
11  
12  
13  
14  
15  
16  
17  
18  
19  
20  
21  
22  
23  
24  
25  
26  
27  
28  
29  
30  
31  
32  
33  
34  
35  
36  
37  
38  
39  
40  
41  
42  
43  
44  
45  
46  
47  
48  
49

|                               |      |      |      |      |       |      |      |      |      |       |     |      |    |     |
|-------------------------------|------|------|------|------|-------|------|------|------|------|-------|-----|------|----|-----|
| Carotene (mcg)                | 3150 | 3348 | 1671 | 507  | 18295 | 3162 | 3353 | 1672 | 507  | 18338 | 6   | 0.5  | 0  | 0.0 |
| Folate (mcg)                  | 325  | 333  | 103  | 94   | 1222  | 316  | 326  | 101  | 94   | 1262  | 226 | 19.5 | 2  | 0.2 |
| Vitamin C (mg)                | 105  | 113  | 55   | 17   | 619   | 104  | 112  | 55   | 17   | 619   | 22  | 1.9  | 0  | 0.0 |
| Vitamin D (mcg)               | 3.08 | 3.64 | 2.17 | 0.03 | 16.40 | 3.06 | 3.64 | 2.19 | 0.03 | 20.52 | 227 | 19.6 | 8  | 0.7 |
| Vitamin E (mg)                | 13.3 | 15.0 | 7.6  | 2.7  | 74.7  | 13.0 | 14.5 | 7.1  | 2.7  | 71.2  | 238 | 20.5 | 30 | 2.6 |
| Alcoholic beverages (g)       | 104  | 201  | 301  | 0    | 1866  | 104  | 201  | 301  | 0    | 1866  | 0   | 0.0  | 0  | 0.0 |
| Cereals & cereal products (g) | 240  | 257  | 131  | 0    | 1378  | 238  | 255  | 130  | 0    | 1378  | 31  | 2.7  | 0  | 0.0 |
| Eggs & egg dishes (g)         | 18   | 17   | 17   | 0    | 225   | 18   | 17   | 17   | 0    | 225   | 0   | 0.0  | 0  | 0.0 |
| Fats & oils (g)               | 31   | 36   | 25   | 0    | 313   | 31   | 36   | 25   | 0    | 313   | 0   | 0.0  | 0  | 0.0 |
| Fish & fish products (g)      | 32   | 37   | 25   | 0    | 153   | 32   | 37   | 25   | 0    | 153   | 0   | 0.0  | 0  | 0.0 |
| Fruit (g)                     | 184  | 216  | 158  | 0    | 1037  | 184  | 216  | 158  | 0    | 1037  | 0   | 0.0  | 0  | 0.0 |
| Meat & meat products (g)      | 98   | 104  | 52   | 0    | 690   | 98   | 104  | 52   | 0    | 690   | 0   | 0.0  | 0  | 0.0 |
| Milk & milk products (g)      | 414  | 428  | 187  | 0    | 1302  | 414  | 428  | 187  | 0    | 1302  | 0   | 0.0  | 0  | 0.0 |
| Non-alcoholic beverages (g)   | 1159 | 1191 | 397  | 22   | 3677  | 1159 | 1191 | 397  | 22   | 3677  | 0   | 0.0  | 0  | 0.0 |
| Nuts & seeds (g)              | 0    | 3    | 8    | 0    | 135   | 0    | 3    | 8    | 0    | 135   | 0   | 0.0  | 0  | 0.0 |
| Potatoes (g)                  | 125  | 121  | 78   | 0    | 1518  | 125  | 121  | 78   | 0    | 1518  | 0   | 0.0  | 0  | 0.0 |
| Soups & sauces (g)            | 43   | 56   | 51   | 0    | 556   | 43   | 56   | 51   | 0    | 556   | 0   | 0.0  | 0  | 0.0 |
| Sugars (g)                    | 51   | 63   | 50   | 0    | 358   | 51   | 63   | 50   | 0    | 358   | 0   | 0.0  | 0  | 0.0 |
| Vegetables (g)                | 238  | 256  | 128  | 15   | 1047  | 238  | 256  | 128  | 15   | 1047  | 0   | 0.0  | 0  | 0.0 |

Table 5 Comparison of average daily nutrient and food group intakes for women (N=1 340) participating in the EPIC-Norfolk study, from the FETA program, with and without the application of text matching

| Nutrient/Food group     | FETA program, with text matching |      |      |          |          | FETA program, without text matching |      |      |          |          | Quintile change > 1 |      |    |     |
|-------------------------|----------------------------------|------|------|----------|----------|-------------------------------------|------|------|----------|----------|---------------------|------|----|-----|
|                         | Median                           | Mean | SD   | Mini mum | Maxi mum | Median                              | Mean | SD   | Mini mum | Maxi mum | N                   | %    | N  | %   |
| Energy (kcal)           | 1886                             | 1946 | 607  | 608      | 8103     | 1880                                | 1941 | 605  | 608      | 8134     | 50                  | 3.7  | 0  | 0.0 |
| Energy (kJ)             | 7938                             | 8202 | 2554 | 2552     | 34410    | 7909                                | 8177 | 2547 | 2552     | 34541    | 47                  | 3.5  | 0  | 0.0 |
| Protein (g)             | 80.3                             | 82.5 | 22.2 | 26.8     | 277.0    | 79.9                                | 82.1 | 22.1 | 26.8     | 276.6    | 43                  | 3.2  | 0  | 0.0 |
| Alcohol (g)             | 2.0                              | 5.4  | 8.1  | 0.0      | 65.3     | 2.0                                 | 5.4  | 8.1  | 0.0      | 65.3     | 0                   | 0.0  | 0  | 0.0 |
| Carbohydrate (g)        | 238                              | 250  | 90   | 67       | 1596     | 237                                 | 249  | 90   | 67       | 1603     | 58                  | 4.3  | 0  | 0.0 |
| Starch (g)              | 109                              | 114  | 52   | 25       | 1288     | 108                                 | 114  | 52   | 25       | 1301     | 99                  | 7.4  | 0  | 0.0 |
| Englyst fibre (g)       | 18.6                             | 19.3 | 7.4  | 4.1      | 103.7    | 17.8                                | 18.7 | 7.1  | 3.3      | 97.2     | 247                 | 18.4 | 13 | 1.0 |
| Fat (g)                 | 67.6                             | 71.4 | 28.5 | 17.2     | 259.4    | 67.5                                | 71.3 | 28.4 | 17.2     | 259.7    | 45                  | 3.4  | 0  | 0.0 |
| Monounsaturated fat (g) | 22.7                             | 24.4 | 10.6 | 4.8      | 104.2    | 23.1                                | 24.6 | 10.6 | 4.8      | 103.8    | 133                 | 9.9  | 0  | 0.0 |
| Polyunsaturated fat (g) | 12.2                             | 13.6 | 6.2  | 2.6      | 42.5     | 11.5                                | 12.9 | 5.9  | 2.5      | 39.4     | 224                 | 16.7 | 11 | 0.8 |
| Saturated fat (g)       | 25.2                             | 27.2 | 12.4 | 5.1      | 109.6    | 25.5                                | 27.5 | 12.4 | 5.1      | 109.6    | 74                  | 5.5  | 2  | 0.1 |
| Calcium (mg)            | 978                              | 995  | 298  | 242      | 2528     | 976                                 | 992  | 297  | 242      | 2534     | 46                  | 3.4  | 1  | 0.1 |
| Iron (mg)               | 11.7                             | 11.9 | 3.9  | 3.1      | 67.8     | 11.1                                | 11.4 | 3.5  | 3.1      | 55.3     | 280                 | 20.9 | 44 | 3.3 |
| Potassium (mg)          | 3788                             | 3874 | 994  | 1284     | 12702    | 3744                                | 3848 | 987  | 1280     | 12526    | 68                  | 5.1  | 0  | 0.0 |

Formatted Table

Formatted: Right

1  
2  
3  
4  
5  
6  
7  
8  
9  
10  
11  
12  
13  
14  
15  
16  
17  
18  
19  
20  
21  
22  
23  
24  
25  
26  
27  
28  
29  
30  
31  
32  
33  
34  
35  
36  
37  
38  
39  
40  
41  
42  
43  
44  
45  
46  
47  
48  
49

|                               |      |      |      |      |       |      |      |      |      |       |     |      |    |     |
|-------------------------------|------|------|------|------|-------|------|------|------|------|-------|-----|------|----|-----|
| Carotene (mcg)                | 3489 | 3731 | 1705 | 178  | 13796 | 3500 | 3736 | 1707 | 175  | 13796 | 11  | 0.8  | 0  | 0.0 |
| Folate (mcg)                  | 326  | 337  | 107  | 102  | 1311  | 318  | 329  | 105  | 97   | 1276  | 291 | 21.7 | 1  | 0.1 |
| Vitamin C (mg)                | 124  | 133  | 63   | 4    | 809   | 122  | 132  | 62   | 4    | 809   | 34  | 2.5  | 0  | 0.0 |
| Vitamin D (mcg)               | 3.07 | 3.49 | 1.89 | 0.22 | 12.06 | 3.02 | 3.46 | 1.89 | 0.29 | 12.46 | 248 | 18.5 | 9  | 0.7 |
| Vitamin E (mg)                | 12.5 | 13.8 | 6.3  | 2.7  | 52.4  | 12.1 | 13.3 | 5.9  | 3.3  | 43.6  | 270 | 20.2 | 21 | 1.6 |
| Alcoholic beverages (g)       | 21   | 61   | 104  | 0    | 1350  | 21   | 61   | 104  | 0    | 1350  | 0   | 0.0  | 0  | 0.0 |
| Cereals & cereal products (g) | 214  | 236  | 174  | 9    | 4948  | 212  | 234  | 174  | 9    | 4948  | 40  | 3.0  | 0  | 0.0 |
| Eggs & egg dishes (g)         | 14   | 16   | 14   | 0    | 136   | 14   | 16   | 14   | 0    | 136   | 0   | 0.0  | 0  | 0.0 |
| Fats & oils (g)               | 27   | 30   | 19   | 0    | 133   | 27   | 30   | 19   | 0    | 133   | 0   | 0.0  | 0  | 0.0 |
| Fish & fish products (g)      | 32   | 39   | 26   | 0    | 187   | 32   | 39   | 26   | 0    | 187   | 0   | 0.0  | 0  | 0.0 |
| Fruit (g)                     | 238  | 277  | 199  | 0    | 2830  | 238  | 277  | 199  | 0    | 2830  | 0   | 0.0  | 0  | 0.0 |
| Meat & meat products (g)      | 90   | 95   | 49   | 0    | 392   | 90   | 95   | 49   | 0    | 392   | 0   | 0.0  | 0  | 0.0 |
| Milk & milk products (g)      | 381  | 410  | 174  | 0    | 959   | 381  | 410  | 174  | 0    | 959   | 0   | 0.0  | 0  | 0.0 |
| Non-alcoholic beverages (g)   | 1148 | 1153 | 404  | 8    | 3215  | 1148 | 1153 | 404  | 8    | 3215  | 0   | 0.0  | 0  | 0.0 |
| Nuts & seeds (g)              | 0    | 3    | 11   | 0    | 180   | 0    | 3    | 11   | 0    | 180   | 0   | 0.0  | 0  | 0.0 |
| Potatoes (g)                  | 116  | 113  | 61   | 0    | 785   | 116  | 113  | 61   | 0    | 785   | 0   | 0.0  | 0  | 0.0 |
| Soups & sauces (g)            | 45   | 57   | 53   | 0    | 900   | 45   | 57   | 53   | 0    | 900   | 0   | 0.0  | 0  | 0.0 |
| Sugars (g)                    | 38   | 50   | 46   | 0    | 540   | 38   | 50   | 46   | 0    | 540   | 0   | 0.0  | 0  | 0.0 |
| Vegetables (g)                | 265  | 288  | 140  | 2    | 1387  | 265  | 288  | 140  | 2    | 1387  | 0   | 0.0  | 0  | 0.0 |

**DISCUSSION**

FETA provides a new, freely available, standalone tool that can produce nutrient and food group intake values from data collected using the EPIC-Norfolk FFQ. It makes the EPIC-Norfolk FFQ readily accessible to end-users and enables them to process and analyse nutritional data. The data can either be entered into a spreadsheet, using the instructions provided, or by using the specifically developed Microsoft Access form-based entry tool. The Access entry tool allows easier entry without requiring knowledge of specific food codes. The software for FETA for Windows and Linux can be downloaded from the website, as can the Microsoft Access data entry utility (<http://www.srl.cam.ac.uk/epic/epicffq/>). Users are encouraged to register with EPIC-Norfolk, as this enables them to request assistance and support. The various types of output (with four levels of information) available should prove beneficial to researchers, especially those requiring more detailed information. There is an on-going need for information on the intake of food groups. While the data from either output 3 or 4 could be used to generate more detailed food group data, we have treated food groups as another type of nutrient – a pseudo-nutrient. The FETA input/look-up files can be easily modified to create new groups, greatly adding to the flexibility of the system for analysing food group consumption, while requiring no spreadsheet or programming skills on the part of the analyst. A helpful feature of FETA is the log file which documents errors relating to FFQ data and/or default food codes assigned.

FETA was designed and based on the extensively validated EPIC-Norfolk FFQ, originally developed in 1988, to assess the nutrient and food group intake of 40-79 year olds, who completed the FFQ between 1993 and 1997. The food list and look-up lists of milks, breakfast cereals and fats reflect this time period and the study population, as do the default milk, cereal, baking fat and frying fat codes assigned. However, the program was created in such a way that it can be customised for different study populations, easily enabled by the separation of the processing algorithm in the FETA program implementation from the data model text files. It is possible to delete/add foods and/or FFQ lines, and modify portion sizes as desired for a study.



1  
2  
3  
4  
5  
6 277 Nutrient data may also be easily modified or added. It is also possible for FETA to be used with  
7  
8 278 other questionnaires containing a different set of line items or different numbers of frequencies.

9  
10 279 Comparisons were carried out for a number of selected nutrients obtained from FETA and the  
11  
12 280 previously validated CAFÉ program. These showed that the nutrient output from both programs  
13  
14 281 were generally similar. All differences (>0.1%) found from the comparison of detailed  
15  
16 282 food/nutrient data at the individual level for 12 500 participants from FETA and the CAFÉ  
17  
18 283 program can be explained by one or more of the following reasons: up to four cereal foods  
19  
20 284 assigned by FETA, as compared to a maximum of two cereal foods assigned by CAFÉ;  
21  
22 285 differences in default baking and frying fat codes assigned; correction for muesli portion size in  
23  
24 286 cereal data; exclusion of porridge from cereal data (free text); default codes assigned for milk,  
25  
26 287 cereals or fats to participants using FETA (where no food codes were assigned by CAFÉ  
27  
28 288 program); rounding error (only where percentage absolute differences were between 0.1 to 1%)  
29  
30 289 and changes made to the nutrient data of six of the nine new foods as well as to the default code  
31  
32 290 for milk. A section entitled ‘What are the differences between FETA versus CAFÉ processing?’  
33  
34 291 found at <http://www.srl.cam.ac.uk/epic/epicffq/FAQs.html> further explains the aforementioned  
35  
36 292 differences.

37 293 Although nutrient intakes as calculated by FETA and CAFÉ were similar, some relatively small  
38  
39 294 differences existed, but these and the quintile shift of men and women can be explained. In  
40  
41 295 FETA, a number of changes were made to the processing of breakfast cereals, affecting  
42  
43 296 carbohydrate, starch, Englyst fibre, iron and folate estimates. The vitamin C content per 100g of  
44  
45 297 low calorie/diet fizzy drinks was changed from 5 to 0 mg and the vitamin E content of crunchy  
46  
47 298 oat cereal and oil and fat non-specific was increased. Changes made to the processing of fats in  
48  
49 299 Questions 6 and 7 in Part 2 of the FFQ, in addition to changes made to the fatty acid profile of the  
50  
51 300 three new fats, could help explain the small differences observed in monounsaturated,  
52  
53 301 polyunsaturated and saturated fat intakes.  
54  
55  
56  
57  
58  
59  
60

1  
2  
3  
4  
5  
6 302 There was quite a large range in intake in the fourteen food groups, with a minimum intake of  
7  
8 303 zero for each of the food groups. It is difficult to compare food group intake data as the groupings  
9  
10 304 of foods often varies. However, the combined mean intake of fruit (excluding juices) and  
11  
12 305 vegetables for men and women was 467g and 562g respectively, achieving the Government's  
13  
14 306 'Five a day' recommendation(23), using a portion size of 80 g.

15 307 Whilst text matching only affected one food group (cereals and cereal products), more than 15%  
16  
17 308 of men and women changed quintile for a number of nutrients: Englyst fibre, polyunsaturated fat,  
18  
19 309 folate, vitamin D and vitamin E, and iron (women only). Yet again, these nutrients related to the  
20  
21 310 text matching of breakfast cereals and baking and frying fats. The inclusion of these data  
22  
23 311 illustrates the effect of text matching on the ranking of individuals for certain nutrients and will  
24  
25 312 enable future researchers using FETA to make informed decisions on the benefit of text matching  
26  
27 313 for their study.

28  
29 314 We have not addressed or discussed common FFQ issues, such as the number of items in a food  
30  
31 315 list or the use of a single average portion size, as these are not the focus of this paper and have  
32  
33 316 been reviewed previously (24,25).

34 317 It is anticipated that future updates of FETA might contain a number of improvements and  
35  
36 318 overcome some of the limitations of FETA, currently released as version 2.53 for Windows and  
37  
38 319 Linux (last updated 15/03/2013 and 21/02/2013 respectively). The source code has been made  
39  
40 320 available online which enables users to make modifications and improvements to the program.

41  
42 321 Currently, we have made available Windows and Linux versions and it is hoped that an OS X  
43  
44 322 version will follow soon. We are currently working on a Libreoffice version of the Microsoft  
45  
46 323 Access form-based entry tool.

47  
48 324 In conclusion, we have created a new, open source, standalone, cross-platform FFQ processing  
49  
50 325 tool, FETA, to produce nutrient and food group data for researchers using the EPIC-Norfolk  
51  
52 326 FFQ. The tool produces similar nutrient and food group values to the previously validated CAFÉ  
53  
54 327 program, but is more accessible. Although FETA was designed and based on the EPIC-Norfolk

1  
2  
3  
4  
5  
6  
7  
8  
9  
10  
11  
12  
13  
14  
15  
16  
17  
18  
19  
20  
21  
22  
23  
24  
25  
26  
27  
28  
29  
30  
31  
32  
33  
34  
35  
36  
37  
38  
39  
40  
41  
42  
43  
44  
45  
46  
47  
48  
49  
50  
51  
52  
53  
54  
55  
56  
57  
58  
59  
60

328 FFQ, the program was created in such a way that it can be customised for different study  
329 populations. It is anticipated that the development and availability of FETA will be a useful  
330 addition to the field of nutritional epidemiology and dietary public health.

### 332 **Acknowledgments**

333 We thank Mr Adam Dickinson, senior data manager at the MRC Epidemiology Unit, and his  
334 team members for their contribution to project management of FETA; Professor Nick Wareham,  
335 as EPIC-Norfolk study PI; and Mr Jamal Natour, as FETA software developer. The authors  
336 would also like to thank all the participants of the EPIC-Norfolk study and the EPIC-Norfolk  
337 staff for their help with this work.

### 338 **Contributors**

339 AAM contributed to the software development, assisted in statistical analyses and drafted the  
340 manuscript. AB and RL contributed to the software development, assisted in statistical analyses  
341 and contributed to the manuscript. DJP-S wrote the step-based graphical wizard for running  
342 FETA and contributed to the manuscript. NGF, LO'C and K-TK (Principal Investigator of EPIC-  
343 Norfolk) contributed to the manuscript. APK created the Microsoft Access form-based entry tool  
344 and contributed to the manuscript. All authors approved the final manuscript.

### 345 **Funding**

346 This study was supported by programme grants from the MRC Population Health Sciences  
347 Research Network (PHSRN), Cancer Research UK (C864/A8257) and the Medical Research  
348 Council (G0401527 and G1000143); NGF was supported by the Medical Research Council  
349 (MC\_UP\_A100\_1003); APK is funded by a Wellcome Trust Clinical Research Fellowship.

350 **Competing interests** None.

351 **Ethics approval** Norwich Local Research Ethics Committee.

### 353 **References**

- 1  
2  
3  
4  
5  
6 354 1. Subar AF. Developing dietary assessment tools. *J Am Diet Assoc* 2004 May;**104**(5):769–  
7  
8 355 70. [www.ncbi.nlm.nih.gov/pubmed/15127062](http://www.ncbi.nlm.nih.gov/pubmed/15127062) (accessed 5 Nov 2013).
- 9  
10  
11 356 2. Welch AA, Luben R, Khaw KT, et al. The CAFE computer program for nutritional  
12  
13 357 analysis of the EPIC-Norfolk food frequency questionnaire and identification of extreme  
14  
15 358 nutrient values. *J Hum Nutr Diet* 2005;**18**(2):99–116.
- 16  
17 359 3. Bingham SA, Gill C, Welch A, et al. Validation of dietary assessment methods in the UK  
18  
19 360 arm of EPIC using weighed records, and 24-hour urinary nitrogen and potassium and  
20  
21 361 serum vitamin C and carotenoids as biomarkers. *Int J Epidemiol* 1997;**26**(1):S137–S151.
- 22  
23  
24 362 4. Bingham SA, Welch AA, McTaggart A, et al. Nutritional methods in the European  
25  
26 363 Prospective Investigation of Cancer in Norfolk. *Public Health Nutr* 2001;**4**(3):847–58.
- 27  
28  
29 364 5. McKeown NM, Day NE, Welch AA, et al. Use of biological markers to validate self-  
30  
31 365 reported dietary intake in a random sample of the European Prospective Investigation into  
32  
33 366 Cancer United Kingdom Norfolk cohort. *Am J Clin Nutr* 2001;**74**:188–96.
- 34  
35  
36 367 6. Rimm EB, Giovannucci EL, Stampfer MJ, et al. Reproducibility and validity of an  
37  
38 368 expanded self-administered semiquantitative food frequency questionnaire among male  
39  
40 369 health professionals. *Am J Epidemiol* 1992 May;**135**(10):1114–26.  
41 370 [www.ncbi.nlm.nih.gov/pubmed/1632423](http://www.ncbi.nlm.nih.gov/pubmed/1632423) (accessed 5 Nov 2013).
- 42  
43  
44 371 7. Bingham SA, Gill C, Welch A, et al. Comparison of dietary assessment methods in  
45  
46 372 nutritional epidemiology: weighed records v. 24 h recalls, food-frequency questionnaires  
47  
48 373 and estimated-diet records. *Br J Nutr* 1994;**72**(4):619–43.
- 49  
50  
51 374 8. Day N, Oakes S, Luben R, et al. EPIC-Norfolk: study design and characteristics of the  
52  
53 375 cohort. *European Prospective Investigation of Cancer. Br J Cancer* 1999 Jul;**80**(Suppl  
54  
55 376 1):95–103. [www.ncbi.nlm.nih.gov/pubmed/10466767](http://www.ncbi.nlm.nih.gov/pubmed/10466767) (accessed 5 Nov 2013).
- 56  
57  
58  
59  
60

- 1  
2  
3  
4  
5  
6 377 9. Gregory J, Foster K, Tyler H, Wiseman M. The Dietary and Nutritional Survey of British  
7  
8 378 Adults. London: Her Majesty's Stationary Office (HMSO) 1990.  
9  
10  
11 379 10. MAFF. The Dietary and Nutritional Survey of British Adults - Further Analysis. London:  
12 380 Her Majesty's Stationary Office (HMSO) 1994.  
13  
14  
15 381 11. MAFF. Food Portion Sizes. 2nd ed. London: Her Majesty's Stationary Office (HMSO)  
16 382 1993.  
17  
18  
19  
20 383 12. Holland B, Unwin I, Buss D. Cereals and cereal products. The third supplement to  
21 384 McCance & Widdowson's The Composition of Foods (4th Edition). Cambridge:  
22 385 RSC/MAFF 1988.  
23  
24  
25  
26  
27 386 13. Holland B, Unwin I, Buss D. Milk products and eggs. The fourth supplement to McCance  
28 387 & Widdowson's The Composition of Foods (4th Edition). Cambridge: RSC/MAFF 1989.  
29  
30  
31  
32 388 14. Holland B, Welch AA, Unwin D, Buss DH, Paul AA, Southgate DAT. McCance and  
33 389 Widdowson's The Composition of Foods. Cambridge: Royal Society of Chemistry (RSC)  
34 390 1991.  
35  
36  
37  
38 391 15. Holland B, Unwin I, Buss D. Vegetables, herbs and spices. The fifth supplement to  
39 392 McCance & Widdowson's The Composition of Foods (4th Edition). Cambridge:  
40 393 RSC/MAFF 1991.  
41  
42  
43  
44  
45 394 16. Holland B, Unwin I, Buss D. Fruit and nuts. The first supplement to McCance &  
46 395 Widdowson's The Composition of Foods (5th Edition). Cambridge: RSC/MAFF 1992.  
47  
48  
49  
50 396 17. Holland B, Welch A, Buss D. Vegetable dishes. The second supplement to McCance &  
51 397 Widdowson's The Composition of Foods (5th Edition). Cambridge: RSC/MAFF 1992.  
52  
53  
54  
55  
56  
57  
58  
59  
60

1  
2  
3  
4  
5  
6  
7  
8  
9  
10  
11  
12  
13  
14  
15  
16  
17  
18  
19  
20  
21  
22  
23  
24  
25  
26  
27  
28  
29  
30  
31  
32  
33  
34  
35  
36  
37  
38  
39  
40  
41  
42  
43  
44  
45  
46  
47  
48  
49  
50  
51  
52  
53  
54  
55  
56  
57  
58  
59  
60

- 398 18. Holland B, Brown J, Buss D. Fish and fish products. The third supplement to McCance &  
399 Widdowson's The Composition of Foods (5th Edition). Cambridge: RSC/MAFF 1993.
- 400 19. Chan W, Brown J, Buss D. Miscellaneous foods. The fourth supplement to McCance &  
401 Widdowson's The Composition of Foods (5th Edition). Cambridge: RSC/MAFF 1994.
- 402 20. Chan W, Brown J, Lee S, Buss D. Meat, poultry and game. The fifth supplement to  
403 McCance & Widdowson's The Composition of Foods (5th Edition). Cambridge:  
404 RSC/MAFF 1995.
- 405 21. Chan W, Brown J, Church S, Buss D. Meat products and dishes. The sixth supplement to  
406 McCance & Widdowson's The Composition of Foods (5th Edition). Cambridge:  
407 RSC/MAFF 1996.
- 408 22. COMA. Dietary Reference Values for Food Energy and Nutrients for the United Kingdom.  
409 London: Her Majesty's Stationary Office (HMSO) 1991.
- 410 23. Department of Health. [www.nhs.uk/Livewell/5ADAY/Pages/5ADAYhome.aspx](http://www.nhs.uk/Livewell/5ADAY/Pages/5ADAYhome.aspx)  
411 (accessed 5 Nov 2013).
- 412 24. Cade JE, Burley VJ, Warm DL, et al. Food-frequency questionnaires: a review of their  
413 design, validation and utilisation. *Nutr Res Rev* 2004 Jun;**17**(1):5–22.  
414 [www.ncbi.nlm.nih.gov/pubmed/19079912](http://www.ncbi.nlm.nih.gov/pubmed/19079912) (accessed 30 Oct 2013).
- 415 25. Molag ML, de Vries JHM, Ocké MC, et al. Design characteristics of food frequency  
416 questionnaires in relation to their validity. *Am J Epidemiol* 2007 Dec;**166**(12):1468–78.  
417 [www.ncbi.nlm.nih.gov/pubmed/17881382](http://www.ncbi.nlm.nih.gov/pubmed/17881382) (accessed 5 Nov 2013).

1  
2  
3  
4  
5  
6  
7  
8  
9  
10  
11  
12  
13  
14  
15  
16  
17  
18  
19  
20  
21  
22  
23  
24  
25  
26  
27  
28  
29  
30  
31  
32  
33  
34  
35  
36  
37  
38  
39  
40  
41  
42  
43  
44  
45  
46  
47  
48  
49  
50  
51  
52  
53  
54  
55  
56  
57  
58  
59  
60

| FOODS AND AMOUNTS                                           | AVERAGE USE LAST YEAR         |               |             |              |              |            |             |             |            |
|-------------------------------------------------------------|-------------------------------|---------------|-------------|--------------|--------------|------------|-------------|-------------|------------|
|                                                             | Never or less than once/month | 1-3 per month | Once a week | 2-4 per week | 5-6 per week | Once a day | 2-3 per day | 4-5 per day | 6+ per day |
| <b>BREAD AND SAVOURY BISCUITS</b><br>(one slice or biscuit) |                               |               |             |              |              |            |             |             |            |
| White bread and rolls                                       |                               |               |             |              |              | ✓          |             |             |            |
| Brown bread and rolls                                       |                               |               |             | ✓            |              |            |             |             |            |
| Wholemeal bread and rolls                                   | ✓                             |               |             |              |              |            |             |             |            |
| Cream crackers, cheese biscuits                             |                               | ✓             |             |              |              |            |             |             |            |
| Crispbread, eg. Ryvita                                      |                               | ✓             |             |              |              |            |             |             |            |
| <b>CEREALS</b> (one bowl)                                   |                               |               |             |              |              |            |             |             |            |
| Porridge, Readybrek                                         |                               |               |             | ✓            |              |            |             |             |            |
| Breakfast cereal such as cornflakes, muesli etc.            |                               |               |             |              | ✓            |            |             |             |            |

Part 1 (main part) of the EPIC-Norfolk FFQ, illustrating bread, savoury biscuits and breakfast cereals  
191x81mm (300 x 300 DPI)

Peer review only

1  
2  
3  
4  
5  
6  
7  
8  
9  
10  
11  
12  
13  
14  
15  
16  
17  
18  
19  
20  
21  
22  
23  
24  
25  
26  
27  
28  
29  
30  
31  
32  
33  
34  
35  
36  
37  
38  
39  
40  
41  
42  
43  
44  
45  
46  
47  
48  
49  
50  
51  
52  
53  
54  
55  
56  
57  
58  
59  
60

3. What type of milk did you most often use?  
**Select one only** Full cream/whole  Semi-skimmed   
 Skimmed  Channel Islands, gold   
 Dried milk  Soya   
 Other, specify  None

4. How much milk did you drink each day, including milk with tea, coffee, cereals etc?  
 None  Three quarters of a pint   
 Quarter of a pint  One pint   
 Half a pint  More than one pint

5. Did you usually eat breakfast cereal (excluding porridge and Ready Brek mentioned earlier)?  
 Yes  No

If **YES**, which brand and type of breakfast cereal, including muesli, did you usually eat?  
**List the one or two types most often used**  
 Brand e.g. Kellogg's  Type e.g. cornflakes

6. What kind of fat did you most often use for frying, roasting, grilling etc?  
**Select one only** Butter  Solid vegetable fat   
 Lard/dripping  Margarine   
 Vegetable oil  None   
 If you used vegetable oil, please give type eg. corn, sunflower

7. What kind of fat did you most often use for baking cakes etc?  
**Select one only** Butter  Solid vegetable fat   
 Lard/dripping  Margarine   
 Vegetable oil  None   
 If you used margarine, please give name or type eg. Flora, Stork

10. What did you do with the visible fat on your meat?  
 Ate most of the fat  Ate as little as possible   
 Ate some of the fat  Did not eat meat

Questions from part 2 of the EPIC-Norfolk FFQ, used by FETA  
 207x208mm (300 x 300 DPI)

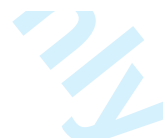



1  
2  
3  
4 1 Appendix 1 Extract from a sample log file produced during the processing of 10 ids, using output 1.  
5  
6  
7 2 2013-01-29 11:54 am: Note : Starting database setup  
8  
9 3 2013-01-29 11:54 am: Note : Loading imports for 'foods' completed  
10  
11 4 2013-01-29 11:54 am: Note : Loading imports for 'meals' completed  
12  
13 5 2013-01-29 11:54 am: Note : Loading imports for 'nutrients' completed  
14  
15 6 2013-01-29 11:54 am: Note : Loading imports for 'food\_nutrients' completed  
16  
17 7 2013-01-29 11:54 am: Note : Loading imports for 'meal\_foods' completed  
18  
19 8 2013-01-29 11:54 am: Note : Loading imports for 'weights' completed  
20  
21 9 2013-01-29 11:54 am: Note : Loading imports for 'portions' completed  
22  
23 10 2013-01-29 11:54 am: Note : Loading imports for 'frequencies' completed  
24  
25 11 2013-01-29 11:54 am: Note : Loading imports for 'cereals' completed  
26  
27 12 2013-01-29 11:54 am: Note : Loading imports for 'milks' completed  
28  
29 13 2013-01-29 11:54 am: Note : Completed database setup  
30  
31 14  
32  
33  
34  
35 15 2013-01-29 11:54 am: Error: Respondent: 001A supplied invalid frequency: -9 for meal: BURGER  
36  
37 16 2013-01-29 11:54 am: Error: Respondent: 001A supplied invalid frequency: -9 for meal: LIVER  
38  
39 17 2013-01-29 11:54 am: Error: Respondent: 003C supplied no baking fat food\_codes  
40  
41  
42  
43  
44  
45

- 1  
2  
3  
4 18 2013-01-29 11:54 am: Note : Respondent: 003C using default baking fat code: 17018  
5  
6 19 2013-01-29 11:54 am: Error: Respondent: 004D supplied invalid frequency: -9 for meal: FRUIT\_SQUASH  
7  
8 20 2013-01-29 11:54 am: Error: Respondent: 005E supplied invalid frequency: -9 for meal: CHICKEN  
9  
10 21 2013-01-29 11:54 am: Error: Respondent: 005E supplied no frying fat food\_codes  
11  
12 22 2013-01-29 11:54 am: Note : Respondent: 005E using default frying fat code: 17046  
13  
14 23 2013-01-29 11:54 am: Error: Respondent: 008H supplied invalid frequency: -9 for meal: INSTANT\_COFFEE  
15  
16 24 2013-01-29 11:54 am: Error: Respondent: 008H supplied no baking fat food\_codes  
17  
18 25 2013-01-29 11:54 am: Note : Respondent: 008H using default baking fat code: 17018  
19  
20 26 2013-01-29 11:54 am: Error: Respondent: 009J supplied invalid frequency: -9 for meal: DAIRY\_DESSERT  
21  
22 27 2013-01-29 11:54 am: Error: Respondent: 009J supplied invalid frequency: -4 for meal: EGGS  
23  
24 28 2013-01-29 11:54 am: Error: Respondent: 009J supplied invalid frequency: -9 for meal: LOWCAL\_SALAD\_CREAM  
25  
26 29 2013-01-29 11:54 am: Error: Respondent: 009J supplied invalid frequency: -9 for meal: PLAIN\_BISCUIT  
27  
28 30 2013-01-29 11:54 am: Error: Respondent: 009J supplied invalid frequency: -9 for meal: INSTANT\_COFFEE  
29  
30 31 2013-01-29 11:54 am: Error: Respondent: 009J supplied invalid frequency: -9 for meal: COFFEE\_WHITENER  
31  
32 32 2013-01-29 11:54 am: Error: Respondent: 009J supplied invalid frequency: -9 for meal: SPINACH  
33  
34 33 2013-01-29 11:54 am: Error: Respondent: 009J supplied no visible fat weighting  
35  
36 34 2013-01-29 11:54 am: Note : Respondent: 009J using default weighting: 1  
37  
38  
39  
40  
41  
42  
43  
44  
45  
46  
47  
48  
49

1  
2  
3  
4 35 2013-01-29 11:54 am: Error: Respondent: 010K supplied no visible fat weighting  
5  
6 36 2013-01-29 11:54 am: Note : Respondent: 010K using default weighting: 1  
7  
8 37 2013-01-29 11:54 am: Note : Processing completed for Respondent: 001A  
9  
10 38 2013-01-29 11:54 am: Note : Processing completed for Respondent: 002B  
11  
12 39 2013-01-29 11:54 am: Note : Processing completed for Respondent: 003C  
13  
14 40 2013-01-29 11:54 am: Note : Processing completed for Respondent: 004D  
15  
16 41 2013-01-29 11:54 am: Note : Processing completed for Respondent: 005E  
17  
18 42 2013-01-29 11:54 am: Note : Processing completed for Respondent: 006F  
19  
20 43 2013-01-29 11:54 am: Note : Processing completed for Respondent: 007G  
21  
22 44 2013-01-29 11:54 am: Note : Processing completed for Respondent: 008H  
23  
24 45 2013-01-29 11:54 am: Note : Processing completed for Respondent: 009J  
25  
26 46 2013-01-29 11:54 am: Note : Processing completed for Respondent: 010K  
27  
28 47 2013-01-29 11:54 am: Note : Questionnaire: sample\_input\_290113.csv processing completed successfully, processed(10) respondents  
29  
30  
31  
32  
33  
34  
35  
36  
37  
38  
39  
40  
41  
42  
43  
44  
45  
46  
47  
48  
49
